# Supplementary material
Source: Research Square preprint supplement (doi:10.21203/rs.3.rs-9482382/v1)
Supplement: Supplementary file 1 [file e48a340b820fdf6beba18e6b.xlsx]

## Sheet: Sheet1
Table S5. Annotation and expression levels of candidate genes
QTNs	Gene id	chr	Start Point	End Point	Symbol	Description	B73embryo_27DAP	Mo17embryo_27DAP	F1embryo_27DAP	B73endosperm_27DAP	Mo17endosperm_27DAP	F1endosperm_27DAP	B73ear_v14	Mo17ear_v14	F1ear_v14	B73endosperm_14DAP	Mo17endosperm_14DAP	F1endosperm_14DAP	B73silk_0DAP	Mo17silk_0DAP	F1silk_0DAP	B73spikelets_0DAP	Mo17spikelets_0DAP	F1spikelets_0DAP	B73floret_0DAP	Mo17floret_0DAP	F1floret_0DAP	d/a
																												embryo_27DAP	endosperm_27DAP	ear_v14	endosperm_14DAP	silk_0DAP	spikelets_0DAP	floret_0DAP
ySNP1	Zm00001d027875	1	16140364	16141359	SLC25A44	Mitochondrial substrate carrier family protein [Zea mays]	7.83342	6.77595	3.99752	3.69003	5.71786	5.42193	13.2559	6.95494	9.3314	31.2611	34.5669	12.9335	14.5652	7.18414	7.68971	16.3532	15.2625	15.1895	9.84018	8.79319	6.70769	-6.25487	0.70813	-0.245687	-12.0882	-0.863009	-1.13387	-4.98379
ySNP1	Zm00001d027877	1	16282718	16286668	bgh1	big grain1 homolog1	2.83346	1.25186	2.97763	0.02633	0.068042	0	15.6041	18.5582	21.0131	0.53396	0.144516	0.057486	21.0453	2.48343	10.2444	17.9922	20.2106	25.5821	5.25954	4.84948	2.88517	0.0933699	-0.319787	0.790487	-0.479931	0.118837	0.0455046	-1.34976
ySNP1	Zm00001d027878	1	16356238	16360518	AIL1	AP2-EREBP-type transcription factor [Zea mays]	22.0133	33.6876	32.3793	3.6483	3.54759	4.75982	0.0425243	0	0.0807297	2.51817	7.88043	3.68053	0	0	0	0	0	0	0.387913	0.322906	0.265718	0.775868	23.0736	2.79687	-0.566469	NA	NA	-2.75941
ySNP2	Zm00001d027893	1	16948608	16954940	Os03g0179900	lipoxyge0se9 [Zea mays]	10.8605	14.0922	14.716	0	0	0	17.7935	11.6503	15.4323	0.234268	0	0.170506	45.812	19.9596	19.7408	7.8739	6.20007	9.00373	4.17362	7.58218	20.0594	1.38599	NA	0.231258	0.455647	-1.01693	2.34999	8.32112
ySNP2	Zm00001d027894	1	16961016	16961405	-	Os03g0180100, partial [Oryza sativa Japonica Group]	0.375512	0.341333	0.254157	1.12987	0.402753	1.21352	7.36084	10.4642	8.75032	2.84568	2.91923	2.22095	17.1207	23.9131	26.9226	40.5686	44.026	33.2965	6.52541	9.67288	8.43823	-6.10124	1.23011	-0.104535	-17.9888	1.88616	-5.20668	0.215467
ySNP2	Zm00001d027895	1	16968886	16977019	CID7	CTC-interacting domain 7 [Zea mays]	40.9378	55.2664	49.5118	3.28138	3.75915	5.63862	49.0735	48.2671	44.9401	7.11817	8.30934	4.66835	72.9828	65.834	54.5945	49.3575	50.6619	39.0673	31.2144	28.8738	31.1213	0.196766	8.86769	-9.25215	-5.1133	-4.14446	-16.7772	0.92046
ySNP2	Zm00001d027896	1	16977162	16980228	PAA1	maize 20S proteasome alpha subunit [Zea mays]	119.133	155.478	143.342	28.3567	26.3762	25.1847	281.019	290.124	308.763	78.857	101.299	68.4809	231.086	325.274	295.063	222.108	268.477	272.373	111.411	120.124	100.06	0.332151	-2.20316	5.09381	-1.92472	0.358493	1.16803	-3.60555
ySNP3/ySNP4	Zm00001d027950	1	18185512	18190288	UROS	Uroporphyrinogen-III synthase chloroplastic [Zea mays]	8.90743	23.1653	17.3516	3.59671	5.8553	8.99018	37.0382	62.6571	43.836	6.53958	25.227	13.2696	20.985	81.3196	55.7856	32.4814	59.0374	49.8559	17.5631	13.1828	12.6359	0.184493	3.77594	-0.46931	-0.279724	0.153585	0.308517	-1.24971
ySNP3/ySNP4	Zm00001d027954	1	18274522	18280277	KIAA0922	transmembrane protein 131 [Aegilops tauschii subsp. tauschii] [Aegilops tauschii]	17.8197	17.1033	19.7623	4.5901	3.98471	4.84409	19.146	21.4103	18.0421	19.1683	20.1846	17.8739	43.9934	77.9478	51.6771	18.9228	23.9753	18.2334	3.60121	4.0181	3.12769	6.42242	1.83908	-1.97501	-3.54749	-0.547407	-1.2729	-3.27166
ySNP3/ySNP4	Zm00001d027957	1	18280824	18282397	MADS47	MADS-box transcription factor 47 [Zea mays]	3.12877	5.2007	2.58806	6.82365	0.479764	5.14967	2.1697	9.11622	5.24998	19.3912	4.61939	13.1415	1.64234	125.283	29.1166	2.61508	26.1545	10.2923	76.4231	82.5486	55.521	-1.52194	0.472254	-0.113146	0.153832	-0.555579	-0.347711	-7.82448
ySNP3/ySNP4/ySNP5	Zm00001d027962	1	18451773	18457720	VPS37-2	Vacuolar protein-sorting-associated protein 37 homolog 1 [Zea mays]	25.0319	38.8715	38.6834	9.5564	13.1262	12.8163	60.5368	68.2893	64.3391	20.4243	27.2068	18.2176	58.4808	83.1098	62.2306	48.0232	55.5316	57.4419	31.1615	36.2076	29.6343	0.972826	0.826392	-0.0190772	-1.6507	-0.695495	1.50885	-1.6053
ySNP4/ySNP5	Zm00001d027965	1	18511901	18513196	nep1	aspartic protei0se nepenthesin-1 precursor [Zea mays]	119.127	264.049	198.507	1.30626	1.1887	0.656922	113.981	116.648	157.004	0.957157	1.02848	4.19491	1.16246	61.2271	60.4729	212.027	361.312	447.531	0.0711683	1.57237	0.41229	0.0954881	-10.0473	31.2667	89.7879	0.974887	2.1551	-0.545535
ySNP4/ySNP5	Zm00001d027966	1	18514177	18522465	CUTA1	Protein CutA chloroplastic [Zea mays]	48.0679	41.6173	51.3931	13.3561	10.9185	11.7486	74.3883	63.1663	73.9181	47.0773	37.563	34.2428	61.6896	46.4091	49.2854	66.8917	49.9903	70.5159	36.8188	49.1196	34.1283	2.03098	-0.318911	0.916197	-1.69794	-0.623536	1.42886	-1.43745
ySNP4/ySNP5	Zm00001d027967	1	18522679	18525819	DCL	EMB514 [Zea mays]	26.1676	11.3203	20.5734	2.86886	2.21223	3.26172	22.7288	32.5328	24.4509	11.8938	6.62882	9.68088	13.4784	8.73335	10.8444	19.4966	13.2025	17.861	9.07454	8.10983	6.24072	0.24643	2.19659	-0.648685	0.159376	-0.110213	0.480254	-4.87497
ySNP5	Zm00001d027969	1	18597035	18617718	-	dentin sialophosphoprotein-related [Zea mays]	14.1132	20.3635	16.6153	5.14193	12.1361	7.71301	21.0214	20.5433	19.5559	21.1159	35.2453	21.8168	10.9831	11.8451	7.70832	15.4929	16.4678	14.3124	8.3669	5.67986	8.1913	-0.199356	-0.264798	-5.1308	-0.900789	-8.59877	-3.42187	0.869297
ySNP6	Zm00001d027976	1	19023016	19025659	FIP1	GLABRA2 expression modulator [Zea mays]	22.5621	29.5039	25.1089	25.576	22.8168	23.1209	49.1638	67.657	56.9418	37.5375	47.8285	27.0391	18.2438	22.2238	19.2624	31.2668	28.9947	34.4039	29.9989	27.3592	31.1008	-0.266238	-0.779594	-0.158822	-3.04033	-0.48813	3.76145	1.83479
ySNP7	Zm00001d028265	1	28609314	28614314	ARR2	Response regulator 8 [Zea mays]	10.6673	10.7794	9.25628	2.14389	4.23015	4.2282	22.4408	18.5664	20.8427	11.0131	15.6585	10.6742	16.9699	24.0512	17.6718	17.2304	17.0749	17.2491	7.82814	5.41815	8.34202	-26.1758	0.998131	0.17503	-1.14591	-0.801745	1.24015	1.42646
ySNP7	Zm00001d028267	1	28638711	28642886	TPS6	trehalose-6-phosphate synthase2 [Zea mays]	56.8255	76.8834	60.8862	5.74699	14.1517	12.1657	150.381	140.274	145.894	24.0965	31.2291	26.1138	42.3635	118.43	65.6465	206.009	243.692	193.927	15.998	24.565	13.9201	-0.595104	0.527397	0.112071	-0.434338	-0.387821	-1.64125	-1.48509
ySNP7	Zm00001d028269	1	28714876	28733871	HSFA9	hypothetical protein ZEAMMB73_Zm00001d028269 [Zea mays]	7.95726	11.7815	8.97882	4.17676	6.8244	5.61922	11.9738	10.6553	12.355	5.56394	9.78796	7.03402	11.5898	13.4235	10.8398	11.2076	11.9301	11.4634	12.2806	9.67536	11.2508	-0.465746	0.089616	1.57826	-0.303944	-1.81797	-0.291823	0.209456
ySNP7	Zm00001d028272	1	28789870	28800586	TATC	sec-independent protein translocase protein TATC, chloroplastic [Zea mays]	23.172	18.6326	16.2508	3.0453	4.0312	4.79994	35.8261	33.343	33.0672	11.333	17.9339	9.26608	32.9868	32.5693	34.1484	37.6944	40.7834	36.9466	33.5365	31.1833	30.6254	-2.04936	2.55947	-1.22214	-1.62626	6.56415	-1.48417	-1.47418
ySNP8	Zm00001d029044	1	55927640	55936044	ABCE2	PREDICTED: ABC transporter E family member 2 isoform X3 [Zea mays]	71.6083	75.3897	75.2343	27.5113	26.7488	29.264	107.283	123.417	114.162	72.7486	84.0053	71.1021	86.8982	92.5301	80.6975	76.7035	106.874	97.232	37.133	36.4616	34.994	0.917804	5.59703	-0.14731	-1.29254	-3.20199	0.360854	-5.37189
ySNP8	Zm00001d029046	1	56029931	56037966	bms1	PREDICTED: ribosome biogenesis protein BMS1 homolog isoform X1 [Zea mays]	51.74	62.1752	63.8003	9.72354	12.4016	13.5963	54.2902	56.9853	51.8318	30.9852	40.0962	26.8383	29.2704	31.5659	23.3307	30.2909	36.139	34.4878	8.41869	6.3577	6.43852	1.31147	1.89225	-2.82435	-1.91029	-6.17497	0.435306	-0.921573
ySNP8	Zm00001d029047	1	56040100	56042760	FER	PREDICTED: receptor-like protein ki0se FERONIA [Zea mays]	62.9095	43.4507	52.1621	17.3217	22.0095	21.0505	113.913	69.8828	84.3336	50.8447	42.1973	38.7517	88.186	59.8697	91.7873	148.43	91.7546	118.121	40.3936	27.9402	36.0661	-0.10463	0.590848	-0.343599	-1.7969	1.25436	-0.0695596	0.305006
ySNP8	Zm00001d029048	1	56094245	56104240	EMB1401	eukaryotic translation initiation factor 2 beta subunit [Zea mays]	66.5855	54.2046	64.7199	20.1549	20.6126	26.8515	122.788	115.251	118.678	83.485	96.0912	67.7745	103.009	105.156	108.281	77.6684	90.2515	94.7996	36.9737	31.7597	27.2568	0.698638	28.2623	-0.0906423	-3.4925	3.91024	1.7229	-2.72721
ySNP8	Zm00001d029049	1	56106212	56106724	PSB27-1	photosystem II 11 kD protein [Zea mays]	0.217211	0.234321	0.0927403	0.151707	0	0	2.92533	3.28855	3.82316	0	0	0	39.1318	42.8911	44.6387	25.1671	29.3347	18.6548	64.8504	101.788	73.6136	-15.5497	-1	3.94366	NA	1.92978	-4.12519	-0.52551
ySNP8	Zm00001d029050	1	56107554	56110129	ATPK2	Serine/threonine-protein ki0se AtPK1/AtPK6 [Zea mays]	15.5032	7.65577	10.4943	1.39158	1.75311	1.70824	47.4959	55.4579	49.8979	4.91643	4.52352	4.10622	38.5729	43.6222	46.7175	46.05	46.683	58.4658	27.13	30.0446	19.9686	-0.276579	0.751794	-0.396651	-3.12415	2.22604	38.228	-5.91403
ySNP8	Zm00001d029052	1	56147717	56148196	-	Os03g0334300 [Oryza sativa Japonica Group]	60.0285	25.5154	67.794	13.9674	28.7454	24.377	0	0	0.090104	14.5085	32.0181	11.8094	2.47436	1.2548	3.51816	0.483617	0.55577	0.304943	2.0661	1.58795	0.54435	1.45	0.408804	NA	-1.3083	2.71177	-5.95264	-5.36514
ySNP9	Zm00001d029066	1	56975151	56982711	-	PAP/OAS1 substrate-binding domain superfamily [Zea mays]	48.3024	41.0484	31.9196	1.60434	1.36632	1.75402	15.795	18.8251	17.0251	5.19243	4.69259	3.23454	35.1841	30.3916	34.7091	28.8676	37.0906	25.7762	28.097	12.3169	15.6247	-3.5169	2.25775	-0.188121	-6.83402	0.801771	-1.75188	-0.580766
ySNP9	Zm00001d029071	1	57045275	57045843	-	PREDICTED: uncharacterized protein LOC103634619 [Zea mays]	0	0	0	0	0	0	0	0	0	0	0	0	0	0	0	0	0	0	210.105	311.732	265.231	NA	NA	NA	NA	NA	NA	0.0848733
ySNP9	Zm00001d029072	1	57133770	57138680	HAK9	Potassium transporter 2 [Zea mays]	80.4615	77.5403	78.4419	0.423947	1.34781	0.951684	124.572	109.167	120.751	0.880935	1.77182	1.58189	50.8023	73.8744	67.6658	104.574	112.067	116.106	10.2445	11.9276	9.68595	-0.382699	0.142453	0.503905	0.573613	0.461807	2.07825	-1.66367
ySNP9	Zm00001d029074	1	57250815	57254236	Os03g0337600	Uroporphyrinogen decarboxylase 2 chloroplastic [Zea mays]	11.8975	14.8794	11.4478	3.63676	6.59431	5.94542	13.6086	13.5785	12.8299	12.9668	19.8667	11.9795	25.9989	34.4264	32.4856	31.4161	29.9155	25.3659	44.5934	30.4615	33.1031	-1.30158	0.561197	-50.7882	-1.28617	0.539429	-7.06384	-0.626152
ySNP9	Zm00001d029075	1	57258183	57259499	CIPK10	CIPK10 [Saccharum hybrid cultivar ROC22]	16.115	8.39814	13.2178	1.40463	1.1715	1.65964	18.1521	23.9351	20.1807	3.60389	4.04935	5.11371	77.4428	53.283	57.7208	41.1612	41.8606	31.8904	35.0531	28.3043	30.7224	0.249142	3.18767	-0.298429	5.7787	-0.632628	-27.5125	-0.283397
ySNP9	Zm00001d029077	1	57261612	57266206	PUS1	tR0 pseudouridine synthase family protein, expressed [Oryza sativa Japonica Group]	19.8199	14.5055	17.7489	3.03048	3.15583	3.59005	23.9039	31.6056	23.9806	10.045	12.8665	10.2621	7.44111	12.297	9.65433	18.1237	19.6259	18.749	7.71371	7.49403	4.21213	0.220593	7.92828	-0.9801	-0.846106	-0.0884401	-0.167505	-30.8794
ySNP9	Zm00001d029078	1	57267805	57269655	BHLH61	D0 binding protein [Zea mays]	48.9612	25.5962	45.4978	0.050974	0	0	149.099	137.845	157.421	0.0551633	0	0.568256	0	2.99915	2.45414	24.0787	35.0956	69.1035	1.54057	1.77484	2.38395	0.703544	-1	2.47882	19.6027	0.636558	7.1738	6.19999
ySNP10	Zm00001d029121	1	58944824	58953954	CLPR3	ATP-dependent Clp protease proteolytic subunit [Zea mays]	24.044	45.248	36.6126	16.2684	18.9253	17.7413	31.9082	34.5197	33.2973	31.041	35.9477	26.1021	16.1423	19.9736	15.7479	24.876	25.1107	27.7562	25.1178	17.8261	16.3701	0.185488	0.108763	0.0638176	-3.01311	-1.20587	23.5428	-1.39936
ySNP10	Zm00001d029123	1	59023014	59027798	Rad9a	cell cycle checkpoint control protein family [Zea mays]	13.2343	20.1542	21.0188	2.96124	6.22573	3.78429	31.3501	27.3248	25.7847	5.28004	10.872	5.53586	1.68081	4.80406	2.01212	11.9587	11.4145	16.6279	1.64507	1.61797	2.28268	1.24987	-0.495757	-1.76522	-0.908503	-0.787848	18.1602	48.05
ySNP10	Zm00001d029124	1	59028004	59030626	RPS21	40S ribosomal protein S21 [Zea mays]	72.5056	38.8791	56.2933	10.0575	5.87177	7.12438	127.12	143.134	131.764	97.0887	116.345	73.2382	65.0039	79.8289	127.942	95.0822	118.775	141.174	57.8699	65.8079	38.0248	0.0357428	-0.40149	-0.420044	-3.47721	7.49083	2.89077	-6.00002
ySNP10	Zm00001d029125	1	59070431	59071868	-	PREDICTED: desiccation-related protein PCC13-62-like [Setaria italica]	0.133506	0.306882	0.699758	0	0	0	0	0	0.103385	4.28585	0	0	0	0	0	1.21272	0.469297	0.286406	4.39404	2.11016	2.22079	5.53209	NA	NA	-1	NA	-1.49203	-0.903119
ySNP10	Zm00001d029126	1	59132630	59134681	CCH	PREDICTED: neurofilament heavy polypeptide-like isoform X1 [Zea mays]	0.329168	0.883345	1.42893	0	0.147696	0	29.7579	7.58191	19.6387	0.0646063	1.06214	0	8.70758	10.3456	11.3139	64.2924	35.2082	32.3006	58.554	68.2607	69.7841	2.96899	-1	0.0873751	-1.12953	2.1823	-1.19995	1.31388
ySNP11	Zm00001d029257	1	63916533	63917166	-	unknown [Zea mays]	11.0016	29.0986	23.2496	6.57635	7.19676	8.49281	9.24085	13.0396	11.5182	8.69683	10.4966	7.98289	29.1636	19.6004	16.2556	9.7029	20.1271	13.3804	9.87474	16.2679	11.7836	0.353593	5.17803	0.199006	-1.79337	-1.69954	-0.294434	-0.402851
ySNP11	Zm00001d029260	1	63980030	63987392	SCAB1	Stomatal closure-related actin-binding protein 1 [Zea mays]	27.6727	25.4755	27.5211	0	0.539349	0.744229	34.2053	25.5718	28.4435	0.34983	3.63677	0.188418	7.8543	18.1019	17.6465	16.8353	20.7884	21.305	6.66219	4.51434	6.52663	0.862019	1.75973	-0.334774	-1.09821	0.911121	1.26135	0.873768
ySNP11	Zm00001d029263	1	64042656	64045687	CPN10	PREDICTED: 10 kDa chaperonin-like [Setaria italica]	22.6906	28.0913	33.2163	1.81326	1.66035	1.42454	98.7356	108.363	100.006	4.50628	7.00873	5.12202	21.2382	37.826	45.0158	43.1009	71.3231	86.1654	10.2614	18.4995	4.41416	2.89791	-4.08436	-0.736186	-0.507891	1.86687	2.05182	-2.41954
ySNP11	Zm00001d029264	1	64207240	64216522	CAMK1	CDPK-related ki0se 1 [Zea mays]	9.68348	7.53395	8.34759	1.33226	1.8128	0.564776	31.8286	31.95	30.0474	10.4879	12.9009	8.32454	19.764	18.311	20.7565	21.5184	25.0493	22.0313	13.7018	17.1393	14.4105	-0.242956	-4.19428	-30.3485	-2.79298	2.3661	-0.709483	-0.587685
ySNP12	Zm00001d029281	1	64728727	64735149	NPSN13	PREDICTED: novel plant S0RE 13-like [Setaria italica]	19.8084	20.8532	18.0478	9.99579	9.57849	10.4656	48.2637	65.2259	59.5793	21.0239	23.4103	18.6069	50.4182	135.872	93.5867	47.9568	75.2276	53.8152	28.4881	36.36	33.587	-4.37006	3.25177	0.334212	-3.02568	0.0103295	-0.570354	0.295446
ySNP12	Zm00001d029285	1	64841582	64846942	PDK	pyruvate dehydroge0se (lipoamide) ki0se1 [Zea mays]	9.1594	4.81652	6.24481	2.50797	1.61703	3.54314	25.1141	22.5283	22.2447	8.61756	9.18368	6.60989	21.5923	28.565	30.0222	18.5439	24.0287	21.2181	76.605	74.0807	110.825	-0.342238	3.3238	-1.21929	-8.09284	1.41796	-0.024885	28.1124
ySNP12	Zm00001d029287	1	64853687	64854838	At4g25210	probable transcription factor At3g04930 [Aegilops tauschii subsp. tauschii] [Aegilops tauschii]	7.80191	29.6027	24.513	7.0965	8.76892	6.74907	13.2824	22.8031	20.6139	10.467	14.7938	9.32479	10.7077	16.3791	13.0614	18.1933	26.6838	20.7848	10.5125	28.8815	11.8001	0.533071	-1.41549	0.540119	-1.52795	-0.169982	-0.389545	-0.859805
ySNP12	Zm00001d029290	1	64986056	64988212	CYP734A6	PREDICTED: cytochrome P450 734A6-like [Zea mays]	0	0	0	0	0	0	0	0.298259	0.67448	0.402408	0	0	67.7704	2.54797	16.6644	72.2048	275.49	20.8196	55.9003	60.4249	42.5027	NA	NA	3.52278	-1	-0.56713	-1.50555	-6.92215
ySNP13	Zm00001d029473	1	72294486	72300404	TAF9	transcription initiation factor TFIID subunit 9B [Zea mays]	14.2064	18.0741	21.4145	4.01879	3.307	3.57358	30.1658	37.2331	31.6004	7.42133	7.97599	6.692	13.5126	13.808	12.7259	23.888	20.7829	25.6822	14.8433	10.0298	8.17284	2.7274	-0.250951	-0.594007	-3.62987	-6.32646	2.15559	-1.77159
ySNP13	Zm00001d029475	1	72345031	72345957	LONRF1	LON peptidase N-termi0l domain and RING finger protein 1 [Triticum urartu]	4.40962	2.89027	3.53797	10.1383	1.64996	7.41778	5.43703	3.01124	4.35123	5.63808	4.13189	1.6391	30.0495	8.30721	6.23676	13.0372	3.03352	4.49103	7.81573	7.68815	5.61201	-0.1474	0.359006	0.104791	-4.31009	-1.19045	-0.708605	-33.5466
ySNP13	Zm00001d029478	1	72423918	72427230	MOB1-A	PREDICTED: MOB ki0se activator-like 1A [Setaria italica]	2.94572	2.88879	2.26643	11.4629	9.29596	14.3825	0	0	0	31.9781	34.6272	23.3547	10.8596	13.7117	14.2956	1.12026	0.731126	0.392062	0.536731	2.1134	1.71118	-22.8659	3.69461	NA	-7.51044	1.40948	-2.74268	0.489787
ySNP14	Zm00001d003333	2	40554878	40561505	-	hapless 8 [Zea mays]	6.25557	8.06465	6.52454	3.08521	8.50946	3.79728	14.6301	12.5814	13.1452	15.737	27.6723	14.5185	19.2937	13.3849	12.5032	14.6424	12.0186	11.8134	10.4013	7.39946	10.3498	-0.702651	-0.737453	-0.449583	-1.20418	-1.29844	-1.15643	0.965677
ySNP14	Zm00001d003334	2	40564810	40567943	-	WPP domain-interacting protein 2 [Zea mays]	4.91413	3.74517	4.98207	4.01516	10.0315	8.52449	11.7618	12.474	9.66531	6.7679	13.4188	10.2488	9.57697	10.441	6.77262	9.9954	9.89806	11.9139	7.92232	6.88119	5.02859	1.11625	0.499019	-6.8868	0.0467415	-7.49112	40.4196	-4.55881
ySNP15	Zm00001d003683	2	54203763	54206701	RPL3	60S ribosomal protein L3-1 [Zea mays]	144.439	69.3612	91.6181	12.8017	5.26303	14.3117	171.661	169.925	171.19	93.9849	68.8194	70.2514	77.3174	87.5197	87.6113	117.987	119.77	148.334	38.441	40.5177	27.3612	-0.407096	1.4006	0.456719	-0.88619	1.01796	33.0446	-11.6706
ySNP15	Zm00001d003684	2	54268746	54272649	RPP25	Alba D0/R0-binding protein [Zea mays]	7.17372	6.63933	5.62517	3.49618	4.92601	4.25419	20.9216	23.5525	23.8053	18.4505	17.4478	13.4686	9.1039	8.52746	6.69747	11.1014	12.7741	16.6809	10.8353	10.4712	7.95326	-4.79557	0.0602748	1.19217	-8.93664	-7.34922	5.67113	-14.8295
ySNP15	Zm00001d003685	2	54347998	54351273	CSN8	COP9 sig0losome complex subunit 8 [Dichanthelium oligosanthes]	36.8082	53.4722	57.5605	20.8696	26.2493	21.1689	88.1049	75.1688	81.4836	57.7617	69.2156	42.1932	47.3632	63.8798	59.1874	47.978	59.7916	56.2454	21.5164	32.0494	19.4647	1.49068	-0.888725	-0.0237029	-3.71846	0.431792	0.399649	-1.38958
ySNP17	Zm00001d040408	3	41714129	41721654	Rep	PREDICTED: rab proteins geranylgeranyltransferase component A 2-like [Zea mays]	10.919	17.3254	15.646	2.4517	7.51562	3.53713	20.1031	19.9426	20.3072	14.4485	26.2378	13.884	11.7901	13.4324	10.2731	10.9501	13.6915	14.4189	5.50803	5.53836	5.98034	0.475712	-0.57131	3.54339	-1.09577	-2.84727	1.53069	30.1407
ySNP18	Zm00001d040411	3	42015187	42023609	RBL20	Rhomboid-like protein 20 [Zea mays]	29.6232	29.1089	31.9235	15.4117	19.1323	18.3537	34.0215	34.9579	36.4586	34.6118	42.114	31.4817	26.4107	32.6616	31.6579	42.8189	39.2974	33.7094	39.0613	36.9848	32.9627	9.94453	0.581463	4.20512	-1.83445	0.678848	-4.17361	-4.87395
ySNP19	Zm00001d040416	3	42358259	42375810	GYRB	D0 gyrase subunit B mitochondrial [Zea mays]	20.6318	22.8806	25.4904	1.77893	1.91232	2.33663	55.1175	53.1338	52.1788	8.30755	7.84268	6.12491	18.3772	13.8693	15.5785	20.6639	21.1215	32.5425	9.55921	4.29151	4.95284	3.3211	7.36187	-1.9628	-8.39023	-0.241675	50.9153	-0.74891
ySNP20	Zm00001d040475	3	45714344	45718276	At1g80270	PREDICTED: pentatricopeptide repeat-containing protein At1g80270, mitochondrial-like [Zea mays]	23.527	20.1133	23.6151	3.71792	3.41478	4.73654	46.4164	44.4358	46.3106	15.3435	14.4635	13.6477	20.1088	22.0743	20.2661	23.1368	26.1651	30.2894	15.7573	12.9642	5.98642	1.05162	7.72024	0.893182	-2.85425	-0.840014	3.7238	-5.99652
ySNP20	Zm00001d040477	3	45760766	45764334	At2g32560	Cyclin-like F-box [Zea mays]	13.1631	21.6334	13.8641	0.025492	0	0.162094	28.6553	16.9944	23.4751	0.251608	0	0.149946	64.3674	25.035	29.49	32.2208	14.0021	21.8338	464.912	178.152	1055.92	-0.834481	11.7173	0.111539	0.191903	-0.773468	-0.140262	5.12199
ySNP21	Zm00001d040508	3	47519975	47520226	TUBB5	Tubulin beta-2 chain [Zea mays]	154.823	106.126	105.224	5.56652	1.75367	4.3029	633.186	726.103	755.969	72.878	30.4607	31.3326	62.3854	145.708	177.072	559.323	883.013	782.802	114.218	49.1727	97.1918	-1.03703	0.337176	1.64285	-0.958889	1.75283	0.380818	0.476471
ySNP21	Zm00001d040509	3	47520802	47522705	TUBB5	beta tubulin5 [Zea mays]	0	0	0	0	0	0	0	0	0	0	0	0	0	0	0	0	0	0	0	0	0	NA	NA	NA	NA	NA	NA	NA
ySNP21	Zm00001d040515	3	47731374	47737817	GAMMACA1	transcription factor APFI [Zea mays]	144.807	144.974	165.83	49.1336	65.109	49.3241	252.761	210.599	249.863	151.14	194.726	148.385	155.13	202.548	211.535	230.584	233.56	260.493	129.427	127.168	88.2958	250.866	-0.976153	0.862526	-1.12642	1.37906	19.0986	-35.4183
ySNP22	Zm00001d040535	3	48587357	48602676	chmp7	SNF7 family protein [Zea mays]	10.2132	9.13213	12.1922	0.105303	0.307152	0.236691	11.8747	13.4052	11.9717	0.522537	1.45318	1.18663	29.0273	22.6005	17.5058	17.9272	12.5958	11.0861	8.74232	9.56624	6.06238	4.66112	0.301847	-0.873303	0.427163	-2.58543	-1.56633	-7.50527
ySNP24	Zm00001d042746	3	178829494	178833021	URIII	Uricase [Zea mays]	66.3751	61.2473	51.4205	15.4395	17.1571	21.8241	102.605	159.198	118.513	57.7522	61.1003	36.9885	101.553	157.006	131.168	101.514	117.536	131.578	37.945	46.4694	32.2243	-4.83276	6.43416	-0.437814	-13.4035	0.0680928	2.75286	-2.34218
ySNP24	Zm00001d042747	3	178858372	178864428	NEK5	Serine/threonine-protein ki0se Nek5 [Zea mays]	8.23886	12.0026	8.52425	0.201851	0.160518	0.144827	18.6893	17.3427	17.7841	0.96457	0.689926	0.532476	19.6218	15.2528	26.6775	29.108	27.9636	25.0055	14.0625	11.9274	10.9217	-0.848344	-1.75925	-0.344499	-2.14658	4.22994	-6.16984	-1.94215
ySNP24	Zm00001d042760	3	179083547	179084182	-	PREDICTED: proline-rich receptor-like protein ki0se PERK9 isoform X1 [Setaria italica]	40.9916	32.1158	32.0258	17.5349	36.4002	23.4191	39.3109	40.3726	40.0979	70.4041	92.4656	75.8279	64.6345	62.6291	56.1911	51.8359	56.437	46.1062	44.965	46.5948	40.5213	-1.02028	-0.376184	0.482598	-0.508306	-7.42057	-3.49055	-6.45271
ySNP24	Zm00001d042761	3	179084549	179088481	SNX1	Sorting nexin 1 [Zea mays]	3.31281	10.0816	9.56848	2.65933	5.38362	5.40175	8.58649	10.359	10.5509	1.86997	2.48268	1.66621	5.3368	4.10114	4.79721	6.67842	6.58325	7.30752	11.3497	12.9581	9.3451	0.848391	1.01331	1.2166	-1.6651	0.126637	14.2199	-3.49262
ySNP25	Zm00001d043012	3	186441816	186450000	At2g40280	PREDICTED: probable methyltransferase PMT23 isoform X2 [Zea mays]	48.7829	62.8414	54.4273	2.7206	3.31642	2.58052	58.5806	51.5814	55.3085	10.5618	20.8173	12.8918	10.9794	25.9137	10.7505	50.5376	58.466	47.5937	14.7756	10.9511	9.73256	-0.197006	-1.47022	0.0649962	-0.545604	-1.03065	-1.74263	-1.63726
ySNP25	Zm00001d043014	3	186516911	186517552	PYL5	uncharacterized LOC100383409 [Zea mays]	11.2906	15.0095	15.6462	81.1595	86.6955	91.113	0	0	0	43.6092	59.1872	43.1944	0	0	0	0	0	0	53.539	117.521	25.7197	1.34239	2.5959	NA	-1.05326	NA	NA	-1.86959
ySNP25	Zm00001d043018	3	186599557	186600219	PRA1B4	prenylated Rab receptor 2 [Zea mays]	1.99286	5.157	4.96653	1.65075	8.56395	3.20935	12.9643	18.2718	15.8804	14.4703	27.3693	10.2074	2.34686	14.8316	14.4443	24.9556	34.3047	21.7071	2.13192	5.15165	3.81132	0.879609	-0.549094	0.0988436	-1.66097	0.937965	-1.69494	0.11229
ySNP26	Zm00001d043022	3	186795510	186813623	SNX2B	PX domain containing protein [Zea mays]	6.73019	4.38369	6.71576	6.26817	4.87966	5.55796	8.21962	8.40745	8.92128	15.6322	11.3846	14.5322	17.6153	13.8589	15.5857	19.1729	17.0982	11.505	9.0219	8.55414	9.17196	0.9877	-0.022986	6.47141	0.482047	-0.0806023	-6.39203	1.64157
ySNP26	Zm00001d043023	3	186815795	186820932	RER5	Protein RETICULATA-RELATED 6 chloroplastic [Zea mays]	4.65321	5.17817	5.08502	1.14936	0.820257	1.27382	6.3571	8.65107	6.74931	0.920431	1.51431	1.73712	11.663	10.1565	12.9491	7.39536	9.5596	6.89618	20.2961	32.3572	44.4595	0.645108	1.75632	-0.658049	1.75034	2.70748	-1.4613	3.00684
ySNP26	Zm00001d043029	3	187041036	187047680	Tom1l2	PREDICTED: target of Myb protein 1-like [Zea mays]	17.1829	28.1573	23.0036	55.3668	39.4178	53.1431	43.0659	33.4302	38.2365	53.1861	42.1212	44.573	62.274	48.1956	45.4742	35.6253	33.0016	30.8334	21.4129	15.0822	20.5528	0.060788	0.721147	NA	-0.556832	-1.38661	-2.6528	0.728287
ySNP27	Zm00001d044266	3	223370008	223382649	FTSH5	ATP-dependent zinc metalloprotease FTSH 4 mitochondrial [Zea mays]	20.4499	21.8785	24.9989	7.17412	8.76754	8.47119	24.3262	24.5265	23.91	17.178	27.8397	16.8781	16.9503	22.3137	15.2608	17.8636	20.9882	19.03	14.6167	12.2085	10.2655	5.36852	0.628033	-5.15651	-1.05626	-1.63001	-0.253394	-2.61372
ySNP27	Zm00001d044267	3	223383091	223386161	GLYR2	Glyoxylate/succinic semialdehyde reductase 2 chloroplastic [Zea mays]	5.86388	8.26586	7.0873	2.45735	4.3713	4.03177	8.91962	8.79467	9.61387	6.7736	12.8373	11.3021	14.0548	13.8465	10.7869	21.9829	17.4988	19.2862	21.5329	23.6661	20.0263	0.0186758	0.645208	12.1129	0.493641	-30.3855	-0.202796	-2.41256
ySNP27	Zm00001d044270	3	223430526	223431488	YLS9	harpin-induced protein [Zea mays]	1.08583	1.74369	2.03218	0.900348	0.653827	1.01915	3.05971	3.36021	4.21185	1.49662	1.09688	0.812508	6.89923	5.91993	6.7289	8.22871	6.77563	7.68495	2.92693	2.98827	2.27753	1.87708	1.96386	6.66817	-2.42278	0.65213	0.251567	-22.1741
ySNP27	Zm00001d044271	3	223462674	223469002	RHD3	Protein ROOT HAIR DEFECTIVE 3 [Zea mays]	106.486	104.334	102.126	40.0861	42.0217	42.3128	119.051	144.742	129.73	103.506	140.047	93.5163	103.002	128.755	120.549	183.158	220.733	184.032	80.2265	99.6889	81.6209	-3.05185	1.30081	-0.168681	-1.54676	0.362702	-0.953487	-0.856702
ySNP27	Zm00001d044273	3	223526343	223543751	SCD1	DENN domain and WD repeat-containing protein SCD1 [Zea mays]	36.5296	42.4356	34.2875	2.13825	6.47311	3.51347	36.9694	22.1286	27.9618	18.4673	30.5863	17.8564	26.7198	26.6154	21.0329	29.2438	32.935	22.6313	11.5551	2.65591	7.70372	-1.75926	-0.365505	-0.213896	-1.10082	-107.996	-4.58282	0.134447
ySNP27	Zm00001d044274	3	223576567	223591635	SCD1	DENN domain and WD repeat-containing protein SCD1, partial [Zea mays]	50.2455	47.2364	43.5697	5.83211	10.6587	7.35862	55.4956	66.3558	58.0991	25.9001	36.371	24.7243	33.3538	51.8715	43.015	52.951	67.0979	59.2778	31.8447	31.3691	26.2748	-3.43701	-0.367458	-0.520542	-1.22458	0.0434546	-0.105552	-22.423
ySNP28	Zm00001d044573	3	232092463	232120781	PRP40A	Pre-mR0-processing protein 40A [Zea mays]	25.0269	31.2207	28.6772	1.28679	4.38144	2.77565	51.8017	25.4075	39.1688	12.0135	20.1664	11.1877	23.7203	24.3362	17.9203	23.2617	23.9033	22.9922	8.19614	2.48249	7.38349	0.178684	-0.0377852	0.0427522	-1.20258	-19.8341	-1.8398	0.715541
ySNP28	Zm00001d044575	3	232166257	232185750	usf	alpha/beta-Hydrolases superfamily protein [Zea mays]	332.692	97.2477	189.417	28.8991	33.2572	30.3833	164.825	143.396	165.433	281.505	286.224	201.531	161.04	323.352	258.581	193.489	189.421	225.833	88.181	85.3824	62.5818	-0.217061	-0.318867	1.05682	-34.8951	0.201892	16.9023	-17.294
ySNP28	Zm00001d044578	3	232292247	232295663	-	Os01g0531000, partial [Oryza sativa Japonica Group]	11.192	6.01518	9.61327	1.28376	1.14526	1.13229	12.8726	11.9279	12.6911	4.66461	5.44823	4.92893	5.97284	6.77492	7.41225	8.29399	7.33944	9.42171	3.59461	3.22428	3.31028	0.390081	-1.18731	0.615659	-0.325383	2.58921	3.36282	-0.535532
ySNP28	Zm00001d044579	3	232296730	232298214	KCS5	3-ketoacyl-CoA synthase 6 [Dichanthelium oligosanthes]	0.385327	0.468467	0.453819	0	0	0	3.3107	6.5615	7.67651	0	0	0	21.9517	71.2375	91.8722	78.0799	48.7207	50.5772	0.509395	1.56354	1.57536	0.647631	NA	1.686	NA	1.83735	-0.873534	1.02243
ySNP29	Zm00001d013175	5	5935831	5936304	-	PREDICTED: uncharacterized protein LOC103625848 [Zea mays]	0	1.33125	0.426574	0.178566	2.55699	0.346653	0.521269	0.17411	0.475828	0.137235	3.86784	0.910723	0.348541	0.369981	0.756226	1.49127	0.532237	0.769713	0.50803	0.146042	0.194131	-0.359138	-0.858656	0.738212	-0.585328	37.0298	-0.504762	-0.73431
ySNP29	Zm00001d013176	5	5958684	5962414	-	EMB2756 [Zea mays]	16.4901	11.8533	13.5046	6.70955	13.1506	8.6917	37.8299	27.5886	30.8513	35.1453	33.0849	33.0235	9.16089	6.66624	6.85659	17.3794	13.4993	22.0635	9.36327	3.94559	1.94156	-0.287758	-0.384523	-0.362845	-1.05956	-0.847391	3.41441	-1.73981
ySNP29	Zm00001d013179	5	5987437	5990898	COR413PM2	cold acclimation protein COR413-PM1 [Zea mays]	20.0366	10.4984	14.4242	0.999234	1.20446	1.13264	26.8522	10.101	15.9073	3.04732	4.14294	2.58848	46.1932	27.0129	36.2288	37.4376	18.2614	30.1194	18.6698	7.12889	11.0555	-0.17683	0.300087	-0.306756	-1.8376	-0.0390235	0.236738	-0.319525
ySNP29	Zm00001d013182	5	6080874	6083740	At5g66560	BTB/POZ domain-containing protein [Zea mays]	6.51295	9.83327	8.22052	0.472839	1.2106	0.33646	18.42	20.1469	19.5439	1.64925	5.80518	2.55301	7.35682	10.1327	11.1658	10.1433	16.3074	19.5245	4.26475	3.66225	3.64256	0.028556	-1.36971	0.30169	-0.565072	1.74437	2.04382	-1.06534
ySNP29	Zm00001d013184	5	6091904	6094570	Os03g0767500	Thiol disulfide interchange protein txlA [Zea mays]	12.9643	10.5906	13.7811	0.401797	0.0912727	0.748194	7.78328	13.5335	10.1084	1.89792	1.16565	2.32901	21.8598	28.5763	23.411	10.2343	13.1556	11.5809	38.7979	35.6971	50.9686	1.68827	3.23104	-0.191307	2.17742	-0.538074	-0.0780778	8.8501
ySNP29	Zm00001d013185	5	6100495	6102030	CYP74A1	PREDICTED: allene oxide synthase 1, chloroplastic [Zea mays]	5.93174	2.97238	6.54819	0.313053	0.179293	0.073554	2.36582	4.48714	3.43643	2.7998	0.724178	0.618362	16.5555	15.746	17.2845	3.30051	3.89118	4.58075	2.9696	7.04684	8.21621	1.41661	-2.58102	0.00938316	-1.10196	2.80104	3.3349	1.57361
ySNP29	Zm00001d013195	5	6186788	6189857	TPP2	Thylakoidal processing peptidase 1 chloroplastic [Zea mays]	10.485	7.13128	13.2781	1.69931	1.29869	2.3557	25.7496	16.7725	22.1976	7.22129	2.48402	2.6599	27.3816	13.2065	20.8693	24.5541	14.9318	21.9324	42.1956	24.3806	32.2161	2.66569	4.27688	0.20865	-0.925745	0.0811704	0.455075	-0.120349
ySNP29	Zm00001d013196	5	6191202	6194942	-	Os03g0765100, partial [Oryza sativa Japonica Group]	10.3624	10.3881	10.2697	10.3885	13.1131	11.9367	8.18289	11.118	9.65797	24.7875	32.9892	20.4326	15.7169	14.8947	17.1909	20.1657	19.048	13.828	22.9447	24.8414	23.9273	-8.22357	0.136437	0.00511869	-2.06195	4.58523	-10.3404	0.0360988
ySNP30	Zm00001d018488	5	221696671	221701929	CYP97A3	cytochrome P450 13 [Zea mays]	9.2038	15.2745	12.152	1.64202	6.37948	3.37521	22.2503	24.3903	21.6872	5.37601	22.2171	9.66941	11.297	8.86872	11.6609	14.0167	18.1995	19.878	30.0661	23.2907	36.713	-0.0287041	-0.268304	-1.5262	-0.490128	1.29975	1.8026	2.96208
ySNP30	Zm00001d018489	5	221702963	221706657	mettl21a	Tumor-related protein [Zea mays]	29.0627	14.7134	15.0936	4.27214	2.05442	3.7868	45.8647	40.2692	41.8862	18.2787	10.9241	14.4253	27.7265	25.008	26.8091	38.6365	34.4942	39.8107	13.9549	12.6749	13.1321	-0.947007	0.562305	-0.422053	-0.0478767	0.325068	1.56692	-0.285612
ySNP30	Zm00001d018494	5	221797234	221800106	PAT15	uncharacterized LOC100217160 [Zea mays]	30.4815	36.0097	39.1703	11.7619	11.8903	12.2331	75.4631	85.1309	69.4217	22.4928	23.1739	16.0717	33.0398	37.2195	30.4844	61.3094	65.6631	74.3082	83.3606	105.783	101.155	2.14344	6.33931	-2.2498	-19.8552	-2.22272	4.97146	0.587208
ySNP30	Zm00001d018495	5	221800393	221803136	WCRKC2	Thioredoxin-like 3-2 chloroplastic [Zea mays]	27.1409	14.2071	13.5427	1.15247	1.09999	1.02741	21.0829	29.534	25.3092	3.60312	6.37314	3.88737	22.7521	30.2229	21.7479	27.9767	35.5353	34.2697	19.4392	27.6553	12.5689	-1.10275	-3.76574	NA	-0.79477	-1.26884	0.665116	-2.67238
ySNP30	Zm00001d018496	5	221803945	221816545	APUM4	Pumilio homolog 4 [Zea mays]	0	0	0	0	0	0	0	0	0	0	0	0	0	0	0	0	0	0	0	0	0	NA	NA	NA	NA	NA	NA	NA
ySNP30	Zm00001d018497	5	221816955	221821994	LPA1	P-loop NTPase domain-containing protein LPA1 homolog 1 [Zea mays]	236.021	228.307	207.258	1.2217	1.91876	1.2163	82.3894	78.6608	77.558	6.82633	9.32958	7.40929	75.3822	82.5575	55.8681	76.2048	101.212	92.1796	96.7628	73.9408	164.824	-6.45691	-1.01551	-1.59154	-0.534238	-6.43923	0.277602	6.96456
ySNP30	Zm00001d018498	5	221848796	221852951	DDB_G0284757	Cysteine protei0ses superfamily protein [Zea mays]	34.6346	31.6646	41.9813	3.17444	7.69966	5.5309	65.2524	60.7323	54.6802	10.0934	20.1609	13.6788	31.3291	22.434	21.6501	50.1981	48.4111	39.2322	53.2597	49.6239	63.9334	5.94711	0.0414777	-3.67794	-0.287735	-1.17625	-11.273	6.87136
ySNP30	Zm00001d018499	5	221859882	221866959	At5g47070	Protein ki0se superfamily protein [Zea mays]	15.0391	31.293	22.0098	2.95388	3.83298	2.73342	18.277	20.5895	19.5917	11.6738	7.67355	11.735	20.3805	13.3619	16.0344	20.8685	24.6215	20.662	9.65531	13.309	12.9227	-0.142279	-1.50156	0.137055	1.03062	-0.23844	-1.11003	0.788543
ySNP30	Zm00001d018501	5	221876374	221878395	dnlz	PREDICTED: DNL-type zinc finger protein [Oryza brachyantha]	17.4628	21.7791	23.0329	7.97702	13.5896	8.13185	30.2361	37.8089	30.9553	29.1119	40.2613	23.9955	25.1512	22.7845	20.0082	26.476	30.377	26.3914	17.2305	15.3561	11.7096	1.58096	-0.944828	-0.810054	-1.91778	-3.34607	-1.04337	-4.89084
ySNP30	Zm00001d018503	5	221970822	221973170	PP1	Serine/threonine-protein phosphatase [Zea mays]	29.8676	47.8414	41.8182	1.58562	4.63781	2.83524	52.9413	58.0377	52.4542	5.96586	14.4444	7.00586	82.3819	59.3649	74.3802	58.32	57.9799	58.7513	31.5764	31.0108	42.9814	0.32978	-0.181163	-1.19117	-0.754672	0.304715	3.5363	41.3348
ySNP30	Zm00001d018504	5	221977188	221990364	-	PREDICTED: uncharacterized protein LOC100279809 isoform X1 [Zea mays]	51.5481	55.6257	59.0488	9.11037	10.1717	9.98307	76.4118	87.2845	89.5706	33.8204	30.6899	32.1621	61.8768	58.5187	48.6422	49.9797	53.035	59.5406	20.8647	26.9863	18.5149	2.67901	0.644502	1.42053	-0.059417	-6.88217	5.25849	-1.76771
ySNP30	Zm00001d018506	5	222064532	222067761	Os12g0163300	Deoxyhypusine hydroxylase [Zea mays]	20.6039	17.6023	17.5445	5.08415	7.5623	4.41037	24.1717	22.178	24.9238	29.386	41.9142	19.2675	31.4255	38.7018	28.8231	26.436	32.5974	21.4404	14.3126	13.4082	12.8329	-1.0385	-1.54378	1.75452	-2.61532	-1.71531	-2.62157	-2.27214
ySNP30	Zm00001d018507	5	222067940	222071136	BET11	Bet1-like S0RE 1-1 [Zea mays]	34.8849	34.426	33.7942	13.2498	16.0899	16.7145	36.1186	53.373	47.916	29.5458	56.5009	30.83	92.8359	93.5961	68.215	53.4951	64.1421	54.9362	29.0745	29.2884	28.1974	-3.75312	1.43978	0.367469	-0.904721	-65.7707	-0.729295	-9.20305
ySNP31	Zm00001d035698	6	41672018	41676772	truB	Pseudouridine synthase family protein [Zea mays]	25.4541	36.5939	39.1615	7.00478	9.52475	7.34474	53.1659	65.6041	54.6294	39.6409	50.478	35.2051	35.2627	36.5507	35.9363	43.5191	48.1273	50.9738	20.8789	19.6231	16.0115	1.46097	-0.730186	-0.764684	-1.81862	0.0459074	2.2354	-6.75186
ySNP31	Zm00001d035700	6	41696515	41698394	GLUB5	legumin 1 precursor [Zea mays]	666.932	394.897	228.654	1076.79	1658.28	1061.89	0	0.0417383	0	10699.2	8663.81	10740.4	0.12016	0	0.135931	1.76973	1.03605	1.98832	2.7172	3.78475	1.45505	-2.22222	-1.05127	-1	1.04045	1.26249	1.59589	-3.36457
ySNP31	Zm00001d035701	6	41698476	41703037	At4g06634	PREDICTED: uncharacterized zinc finger protein At4g06634-like [Setaria italica]	18.8478	23.5495	24.52	7.6035	11.884	9.52052	53.1298	51.2053	49.9786	17.8732	21.0533	13.9757	18.3114	21.141	16.2861	26.8601	26.9706	32.2163	9.61735	9.2666	7.72569	1.41285	-0.104306	-2.2749	-3.45111	-2.43152	95.9084	-9.78621
ySNP31	Zm00001d035702	6	41777881	41783123	VATP-P1	V-type proton ATPase subunit c4 [Zea mays]	187.512	277.747	252.791	53.1342	69.4076	53.2053	220.658	303.953	250.742	176.578	263.526	136.606	160.149	255.176	229.534	273.811	361.22	348.035	139.448	212.328	114.54	0.446879	-0.99126	-0.277644	-1.91943	0.460318	0.698324	-1.68352
ySNP32	Zm00001d033012	1	246988429	246989769	SKIP11	PREDICTED: F-box/kelch-repeat protein At1g74510 [Oryza sativa Japonica Group]	0	0	0	0	0	0	0	0	0	0	0	0	0	0	0	0	0	0	0	0	0	NA	NA	NA	NA	NA	NA	NA
ySNP32	Zm00001d037215	6	116217081	116229459	grx	electron carrier [Zea mays]	12.3815	4.90198	10.3973	3.37516	1.5003	3.00261	20.8435	16.4303	16.4214	5.15576	3.15697	3.65951	7.29118	11.0558	7.97758	6.01902	4.74825	6.89729	3.15218	2.51237	2.17852	0.469443	0.602579	-1.00404	-0.497158	-0.635344	2.38226	-2.04359
ySNP32	Zm00001d037220	6	116364676	116369518	HVA22A	PREDICTED: HVA22-like protein a [Oryza sativa Japonica Group]	31.689	38.2133	30.9848	11.5099	17.241	11.5838	61.0972	81.2719	72.174	21.8024	41.6331	25.0998	25.7592	44.9637	36.0461	44.2606	62.6051	64.0714	20.772	26.6466	18.1462	-1.21587	-0.974206	0.0980889	-0.667443	0.0713033	1.15987	-1.89398
ySNP33	Zm00001d037245	6	117726138	117727409	ATL46	RING-H2 finger protein ATL5I [Zea mays]	11.1073	12.819	13.4421	1.52658	1.54364	1.43099	38.8381	38.7328	34.9762	5.6975	8.28198	3.55326	4.94709	5.82008	6.49017	23.4045	24.677	24.7539	3.21171	3.42629	1.66689	1.72799	-12.21	-72.3915	-2.65931	2.53517	1.12078	-15.3982
ySNP33	Zm00001d037246	6	117736699	117745908	Dcun1d2	Defective in cullin neddylation protein [Zea mays]	196.838	208.913	174.098	174.742	298.733	218.227	210.937	242.168	236.007	414.812	510.179	500.342	213.846	251.737	173.111	214.415	206.955	200.214	104.564	154.768	128.7	-4.76659	-0.298573	0.605472	0.793699	-3.15005	-2.8071	-0.0384774
ySNP33	Zm00001d037247	6	117815623	117824147	DEGP9	Protease Do-like 9 [Zea mays]	60.0622	44.582	67.8105	22.2709	23.6138	25.0678	102.695	53.3474	72.5673	53.5435	54.6139	56.1531	66.9716	24.6791	35.2823	81.536	30.8825	49.2088	24.5749	12.9042	14.6975	2.00105	3.16538	-0.221045	3.87591	-0.498581	-0.276404	-0.692682
ySNP34	Zm00001d038374	6	155771541	155773420	RPL36A	60S ribosomal protein L36 [Zea mays]	394.995	561.952	513.201	137.973	177.415	153.911	725.467	955.523	789.263	480.705	925.126	444.083	296.063	432.211	516.873	481.215	758.245	768.279	230.416	274.017	163.332	0.416004	-0.191811	-0.445387	-1.1648	2.24368	1.07244	-4.0771
ySNP34	Zm00001d038375	6	155834276	155842881	SYCO	Cysteine--tR0 ligase 1 cytoplasmic [Zea mays]	7.83873	19.5649	14.5503	0.325229	1.00616	0.74552	11.2074	6.23863	10.3434	3.42124	5.19882	2.08345	21.9588	10.6855	12.1041	14.7068	11.6284	7.37502	5.39987	0.700367	2.80283	0.144725	0.23446	0.652222	-2.50518	-0.748321	-3.7634	-0.105239
ySNP34	Zm00001d038376	6	155902916	155911076	UBC7	ubiquitin-conjugating enzyme protein E2 [Zea mays]	217.987	219.223	217.818	135.756	170.01	177.136	240.24	209.771	230.752	331.998	368.133	306.56	280.319	275.795	288.545	274.876	238.385	236.397	267.855	255.411	241.021	-1.27228	1.4161	0.377213	-2.40797	4.63616	-1.10894	-3.31282
ySNP34	Zm00001d038377	6	155916652	155920142	-	uncharacterized LOC100194168 [Zea mays]	7.62985	4.29551	5.02275	1.27531	1.95825	1.47321	6.79439	10.6374	11.1014	17.5347	29.9677	18.0228	4.06878	6.02904	6.01746	10.9858	12.1317	11.3472	7.47124	5.59106	4.74123	-0.563791	-0.420453	1.24147	-0.921494	0.988181	-0.369226	-1.904
ySNP34	Zm00001d038378	6	155920028	155922496	COPZ1	coatomer subunit zeta-1 [Zea mays]	42.4674	46.3852	41.2652	28.4562	21.2634	33.9196	53.2149	74.4075	56.6636	88.6301	97.5827	88.1192	40.505	73.2181	64.1161	64.8489	79.8929	68.4959	29.273	37.5274	33.2942	-1.61373	2.51915	-0.674534	-1.11413	0.443521	-0.515147	-0.0256816
ySNP34	Zm00001d038380	6	155926731	155930492	RABE1C	PREDICTED: ras-related protein RABE1c [Oryza brachyantha]	116.163	87.1006	130.07	127.836	161.582	177.717	222.368	129.12	193.537	269.963	256.492	263.522	260.701	148.321	245.641	329.412	213.947	249.592	155.184	87.1067	136.613	1.95702	1.95622	0.381627	0.0437452	0.731982	-0.382591	0.454423
ySNP34	Zm00001d038381	6	155954300	155955375	Os05g0461400	histone H2A [Zea mays]	235.32	238.825	231	18.0138	15.1052	22.1137	675.357	757.891	780.235	55.553	75.9468	32.2705	60.2387	71.3181	56.9271	239.271	324.174	472.904	65.011	75.537	66.6572	-3.46426	3.81906	1.54148	-3.28329	-1.5978	4.50351	-0.687207
ySNP35	Zm00001d020530	7	121046188	121056362	HST	hydroxycin0moyltransferase11 [Zea mays]	17.9648	23.6478	19.7472	4.67385	5.18589	6.66554	13.7399	6.81972	10.1216	18.725	11.5839	13.8353	87.2279	59.5448	45.3497	20.9886	12.6154	22.6785	28.3541	27.6468	16.8835	-0.372724	6.77949	-0.0457371	-0.369456	-2.02555	1.40364	-31.4315
ySNP36	Zm00001d008282	8	3986429	3989894	CNR5	PREDICTED: cell number regulator 5 isoform X1 [Zea mays]	15.2304	7.34301	10.3129	1.06	0.422199	0.991392	27.7177	20.9943	23.3764	2.81009	2.19634	0.924152	10.6594	9.79072	10.6323	27.4561	17.4527	20.7753	30.7001	12.0496	38.7264	-0.246923	0.784866	-0.291413	-5.14558	0.937533	-0.335716	1.86072
ySNP36	Zm00001d008283	8	3990366	3991796	PAZ7	Os01g0267300 [Oryza sativa Japonica Group]	23.5682	0.150335	10.2925	0.300779	0	0.05137	7.67151	8.51411	8.19066	6.04641	0.343206	1.25185	33.7448	18.0385	41.7956	29.7289	54.4291	23.3533	7.70104	9.29889	7.08987	-0.13381	-0.65842	0.232267	-0.681358	2.02517	-1.51624	-1.76499
ySNP36	Zm00001d008284	8	3994584	3997971	RPN11	26S proteasome non-ATPase regulatory subunit 14-like protein [Zea mays]	81.489	44.435	73.1259	16.9636	13.4553	14.5601	161.083	85.7771	137.448	67.768	65.3018	48.971	68.4616	54.7169	63.2377	99.5824	68.6232	99.651	61.2011	33.052	41.6479	0.5486	-0.370154	0.372296	-14.2439	0.23987	1.00443	-0.389258
ySNP36	Zm00001d008287	8	4114922	4117752	BH0283	PREDICTED: uncharacterized isomerase BH0283-like [Setaria italica]	50.7078	44.7836	43.2649	2.69303	6.27378	3.08863	70.095	60.6215	67.0882	30.6529	29.0063	12.7475	18.2483	14.5106	20.5127	37.8264	44.117	61.329	10.5062	62.5721	9.54471	-1.51271	-0.779042	0.365225	-20.7487	2.21164	6.47229	-1.03693
ySNP36	Zm00001d008288	8	4122111	4122386	-	uncharacterized protein LOC100274623 precursor [Zea mays]	4.14869	9.47799	1.54138	36.0985	33.0486	13.1569	0.86942	0.700237	1.51127	89.4957	155.255	18.0941	0.16305	0.561915	0.416025	0.181072	0.889228	0.299889	0.150022	1.01932	0.685795	-1.97848	-14.0439	8.58766	-3.17159	0.268474	-0.664433	0.232656
ySNP36	Zm00001d008289	8	4168577	4174761	LARP1A	La-related protein 1A [Zea mays]	92.905	87.9485	92.809	36.236	41.4917	40.9512	126.547	142.478	127.778	114.206	131.571	102.111	61.3434	80.7284	69.7862	78.4683	89.1452	98.3644	22.381	24.6514	17.7428	0.96127	0.794348	-0.845416	-2.39304	-0.128936	2.72694	-5.0857
ySNP36	Zm00001d021995	7	167680342	167681551	LBD37	LOB domain-containing protein 38 [Zea mays]	0	0	0	0	0	0	0	0	0	0	0	0	0	0	0	0	0	0	0	0	0	NA	NA	NA	NA	NA	NA	NA
ySNP37	Zm00001d008389	8	7021742	7027545	SPL	Sphingosine-1-phosphate lyase [Zea mays]	19.9381	16.3086	15.6286	12.5786	20.4014	18.7156	10.8045	11.2943	10.7831	28.9054	43.8098	23.1573	78.6728	41.7938	41.3905	29.5533	36.0117	17.3981	34.8723	36.4291	38.1201	-1.37474	0.569012	-1.08725	-1.77133	-1.02187	-4.76418	3.17238
ySNP37	Zm00001d008390	8	7120513	7129204	abpC	R0 recognition motif (RRM)-containing protein [Zea mays]	26.4345	32.2582	28.7455	9.27716	20.6523	15.2913	44.0296	37.2636	37.9466	23.1202	30.1739	27.3575	66.4958	48.1435	37.9745	43.3104	33.8356	28.5696	19.7655	16.8222	22.2531	-0.206341	0.0574141	-0.798133	0.201416	-2.10819	-2.11158	2.69038
ySNP37	Zm00001d008395	8	7173973	7176804	Os01g0103600	3-beta-hydroxysteroid-delta-isomerase [Zea mays]	49.1447	27.482	32.0097	20.2443	32.0849	32.1009	77.045	64.5289	72.0812	55.878	90.0462	52.1402	33.3123	54.9615	44.6128	84.1436	75.7518	86.0723	18.1077	89.5714	22.3146	-0.581982	1.00271	0.206818	-1.21879	0.0439686	1.45966	-0.882264
ySNP37	Zm00001d008396	8	7205299	7207898	-	Os05g0102500, partial [Oryza sativa Japonica Group]	21.055	74.721	33.4111	60.5214	125.027	63.0836	38.8612	32.4364	37.4495	56.0241	107.157	56.9582	34.8613	21.2897	23.5321	38.7718	36.1112	38.5732	119.359	107.69	110.401	-0.539519	-0.92056	0.56056	-0.963463	-0.669551	0.850721	-0.535359
ySNP37	Zm00001d008397	8	7232820	7233317	-	PREDICTED: brain acid soluble protein 1 [Setaria italica]	0.384791	1.08155	0.6183	0.83876	0.365944	2.83427	0.096785	0.436023	0.34009	0	0	0.104039	599.847	473.767	385.964	5.5336	13.77	4.03316	189.141	142.942	129.627	-0.329726	9.44095	0.434419	NA	-2.39282	-1.36434	-1.57646
ySNP38	Zm00001d012074	8	167679457	167682478	TBL18	PREDICTED: protein YLS7-like [Setaria italica]	9.17983	5.67398	7.11658	1.42538	2.35421	1.62113	16.1663	14.0309	16.1956	4.28256	10.0986	4.51464	17.0318	15.9726	15.6627	22.4347	17.479	18.764	18.9603	18.1948	16.6114	-0.17703	-0.57851	1.02751	-0.920193	-1.58519	-0.481385	-5.13733
ySNP38	Zm00001d012081	8	167766216	167766518	-	protease inhibitor/seed storage/LTP family protein precursor [Zea mays]	154.909	141.501	169.854	0.825029	0.869198	0.55773	185.717	150.006	310.533	16.2463	8.4	7.09289	0.117514	1.90382	0.044052	330.299	331.249	728.164	9.02379	1.04414	4.62225	3.22942	-13.1036	7.9903	-1.33318	-1.08225	836.931	-0.103192
ySNP38	Zm00001d012083	8	167838073	167839724	-	Thioredoxin F-type chloroplastic [Zea mays]	17.0953	30.5187	24.7581	4.9757	11.2605	7.6485	42.3603	51.9845	43.8886	17.4071	30.0664	15.444	15.4332	31.617	17.2624	21.4176	31.3591	27.5328	9.76801	21.612	15.9588	0.141711	-0.149439	-0.682396	-1.31015	-0.77394	0.230237	0.0453887
ySNP38	Zm00001d012084	8	167840472	167845646	SRD2	snR0-activating protein complex subunit [Zea mays]	0.704957	0.656837	0.558196	0.337598	0	0	6.25297	9.96835	8.91855	0.367288	0.824206	0.731576	14.1823	15.8374	16.7375	14.6844	15.7695	15.0839	37.7276	42.5075	44.23	-5.09978	-1	0.434891	0.594541	2.08767	-0.26376	1.72073
ySNP38	Zm00001d012085	8	167847382	167854391	-	PREDICTED: probable GPI-anchored adhesin-like protein PGA55 isoform X2 [Zea mays]	25.5938	37.8013	31.2161	1.32244	2.47271	2.10126	37.2709	40.1507	36.971	4.38482	9.0645	5.27546	29.2963	47.7133	31.1342	38.8434	48.3721	32.886	73.0615	49.6125	107.698	-0.078872	0.354154	-1.20826	-0.619357	-0.800411	-2.25043	3.95418
ySNP38	Zm00001d012086	8	167856399	167866530	RPN2	Dolichyl-diphosphooligosaccharide--protein glycosyltransferase subunit 2 [Zea mays]	37.9317	44.3452	39.796	6.48225	13.8272	6.46432	79.9502	98.7338	88.3595	54.8451	106.306	47.2676	25.9596	51.302	40.3357	91.8199	101.442	88.0595	46.2997	47.1247	30.719	-0.418651	-1.00488	-0.104618	-1.2945	0.134543	-1.78163	-38.7736
ySNP39	Zm00001d012121	8	168477740	168480878	TTC1	Tetratricopeptide repeat (TPR)-like superfamily protein [Zea mays]	17.2022	7.97461	14.7715	5.42206	5.44027	5.28733	20.4055	13.4395	20.5855	25.6152	32.1162	18.2562	22.4438	17.0587	13.2857	25.4042	16.031	20.1806	23.6528	16.5468	19.2706	0.473166	-15.8053	1.05169	-3.26397	-2.40129	-0.114585	-0.233381
ySNP39	Zm00001d012126	8	168499982	168507430	Tbc1d13	Ypt/Rab-GAP domain of gyp1p superfamily protein [Zea mays]	30.3605	75.5635	72.3776	5.21697	19.2686	7.8258	77.269	132.697	87.0273	4.26534	23.9555	9.93832	81.1287	108.623	84.3412	85.0858	122.366	99.1784	44.7508	67.028	52.0675	0.859042	-0.62868	-0.647894	-0.423775	-0.766319	-0.243963	-0.343123
ySNP39	Zm00001d012127	8	168508873	168510872	-	uncharacterized protein LOC100275901 [Zea mays]	138.232	184.271	152.722	22.5227	49.3809	33.8722	149.082	216.099	200.727	106.558	167.569	101.381	205.606	290.991	285.715	210.943	264.405	261.008	172.008	247.841	160.955	-0.370522	-0.154854	0.541237	-1.16974	0.876437	0.872925	-1.29151
ySNP39	Zm00001d012131	8	168615878	168618956	CPN10	hypothetical protein ZEAMMB73_Zm00001d012131, partial [Zea mays]	24.3467	32.069	27.5064	3.32677	3.63359	3.2571	31.0014	29.1546	26.6339	6.74614	4.26554	4.38424	11.7808	9.66289	11.6395	15.1567	13.9221	17.4986	2.88167	4.24234	4.12762	-0.181669	-1.4541	-3.72989	-0.904291	0.866503	4.79373	0.831382
ySNP39	Zm00001d012137	8	168709170	168716793	At5g05200	Protein ki0se [Zea mays]	13.065	11.533	13.0212	1.70761	2.76264	3.134	20.3001	22.052	18.4955	16.8747	21.8506	14.2954	26.4247	38.6649	26.5505	20.6575	22.9905	21.527	20.2644	17.4054	16.8859	0.942861	1.70397	-3.06017	-2.03669	-0.979443	-0.254637	-1.3634
ySNP39	Zm00001d012140	8	168727319	168730510	CXE16	PREDICTED: probable carboxylesterase 16 [Zea mays]	6.45956	11.0238	9.69629	4.28473	5.94477	3.77221	9.03805	10.8829	9.20712	8.6026	9.96992	6.34035	8.49331	9.15049	8.45838	11.2333	12.4407	10.6292	5.39526	7.40442	4.95002	0.418298	-1.61748	-0.816708	-4.30904	-1.10629	-2.00056	-1.44321
ySNP39	Zm00001d012141	8	168732016	168736038	PTAC10	PREDICTED: protein PLASTID TRANSCRIPTIO0LLY ACTIVE 10 [Setaria italica]	8.94983	10.4786	11.6993	1.31323	1.63322	2.20944	21.6638	25.5861	22.1648	4.80676	5.04962	3.32688	26.7379	23.6564	24.6343	24.1136	25.2535	26.295	26.1579	17.2613	14.8057	2.59703	4.60145	-0.74453	-13.187	-0.36531	2.82745	-1.55202
ySNP39	Zm00001d012142	8	168736577	168739121	yuiD	acid phosphatase/va0dium-dependent haloperoxidase protein [Zea mays]	3.40103	6.31321	3.31051	6.12219	15.2312	11.1994	11.8801	12.376	16.8795	20.0032	25.6547	18.315	17.7586	23.2253	20.8896	16.716	20.9475	21.0699	120.488	89.3497	185.773	-1.06217	0.114782	19.1622	-1.59746	0.145459	1.05786	5.1932
ySNP40	Zm00001d045596	9	28028596	28031674	BAG7	IQ calmodulin-binding motif family protein [Zea mays]	9.25652	5.69334	8.26053	0.450051	0.289849	0.657831	8.81502	6.94335	7.8242	1.03391	0.911244	0.967402	4.3073	3.87256	3.83187	7.16433	5.13026	6.1108	65.9844	65.4221	71.6007	0.440957	3.59398	-0.0587567	-0.0843884	-1.18718	-0.0358892	20.9781
ySNP40	Zm00001d045597	9	28031882	28047094	REN1	Rho GTPase activation protein (RhoGAP) with PH domain [Zea mays]	72.2625	122.139	127.253	10.1365	28.07	11.5815	200.107	187.218	192.867	67.2383	75.7259	52.5205	23.1407	32.0581	36.1154	76.0693	91.0934	112.152	10.7919	15.2161	5.94857	1.20507	-0.838854	-0.123426	-4.46805	1.90997	3.80329	-3.18943
ySNP40	Zm00001d045599	9	28082328	28086696	SKU5	PREDICTED: monocopper oxidase-like protein SKU5 [Setaria italica]	24.718	42.4544	32.2408	2.23868	3.59006	2.45835	137.801	161.285	135.954	14.9643	31.8914	12.6016	9.0297	6.0509	14.2507	27.6782	44.6329	59.9171	2.86979	1.84335	2.06988	-0.151711	-0.674893	-1.1573	-1.27915	4.50543	2.80295	-0.558601
ySNP41	Zm00001d045888	9	45945932	45946440	AGP23	Pollen-specific arabinogalacta protein BAN102 [Zea mays]	0.308346	1.78991	1.2825	0	0	0	1.90513	0.160727	1.44984	0	0	0.100592	148.21	87.8378	73.9674	5.50127	2.55349	1.56936	1579.38	2119.36	2392.8	0.315038	NA	0.478001	NA	-1.4595	-1.6677	2.01282
ySNP42	Zm00001d000178	ctg181	130973	139616	ATG3	autophagy3	29.2116	35.6802	26.3412	44.0296	61.3623	70.9485	52.6814	53.3338	54.4579	73.3934	108.717	69.9226	86.6974	111.442	99.6127	60.1111	70.3248	64.7356	31.6593	39.4043	41.5055	-1.88746	2.10615	4.44617	-1.19651	0.0438907	-0.0944494	1.54259
ySNP42	Zm00001d000181	ctg181	247190	251607	-	-	3.98423	1.36137	2.08611	3.37207	4.05539	2.74432	0	0	0	13.7486	6.41881	15.2169	0	0	0	0	0	0	0	0	0	-0.447366	-2.83733	NA	1.40065	NA	NA	NA
ySNP43	Zm00001d023294	10	2262454	2264529	O0C010	DREB protein [Saccharum spontaneum]	8.58002	7.67443	6.20065	7.92761	4.03614	10.0116	4.7607	3.02742	3.52462	12.5376	1.62784	5.02334	1.45106	0.974738	0.362837	10.9029	2.38098	2.84373	6.38183	4.79563	7.98844	-4.25484	2.07107	-0.426288	-0.377531	-3.5693	-0.891398	3.02574
ySNP43	Zm00001d023299	10	2352149	2356207	Os03g0328900	Zinc finger CCCH domain-containing protein 46 [Zea mays]	20.5884	25.1806	34.1273	4.83594	0.338584	5.52052	190.77	119.836	154.75	18.633	11.728	13.3702	6.38418	9.65801	11.608	59.1437	38.1033	86.2204	6.28928	11.6792	8.11828	4.89649	1.30444	-0.0155949	-0.524352	2.19126	3.57378	-0.321332
ySNP43	Zm00001d023300	10	2361652	2365412	At4g18975	EMB2748 [Zea mays]	17.6338	20.6465	26.4464	3.02504	1.77668	2.66498	60.282	179.528	98.0297	10.4021	12.3309	9.18809	6.01599	12.3532	9.18758	20.1691	32.0879	41.6906	6.77431	10.7752	6.90256	4.85021	0.423147	-0.366896	-2.25886	NA	2.61136	-0.93589
ySNP45	Zm00001d024587	10	79465955	79472158	NPF6.3	Protein NRT1/ PTR FAMILY 6.3 [Zea mays]	13.3119	13.8331	17.0336	0.056422	0.160326	0.111263	27.6387	25.9968	32.5206	0.388926	0	0.31019	76.3405	91.012	89.3909	81.363	82.8851	54.9001	61.9407	65.9784	47.6512	13.2826	0.0556056	6.94632	0.595108	0.779011	-35.7721	-8.07814
ySNP46	Zm00001d024620	10	80551131	80554704	-	basal layer antifungal peptide [Zea mays]	35.058	3.54992	11.1443	5.51353	5.95294	5.53547	0	0	0	211.847	160.744	113.561	0	0	0	0	0	0	0	0	0	-0.517943	-0.900155	NA	-2.84661	NA	NA	NA
ySNP46	Zm00001d025570	10	122602824	122612725	UBP3	Ubiquitin carboxyl-termi0l hydrolase 3 [Zea mays]	14.082	14.3042	16.8523	2.88058	5.09102	3.09442	27.2046	24.9215	27.7585	13.8118	20.1513	11.73	19.0657	23.7125	19.7976	22.0008	26.5908	23.8605	11.0454	13.2627	10.8922	23.9389	-0.806522	1.4852	-1.65677	-0.684986	-0.189676	-1.13824
ySNP47	Zm00001d024591	10	79578452	79580065	LSM2	SnRNP core Sm protein Sm-X5-like protein [Zea mays]	75.3698	106.747	81.5485	29.7692	43.7122	29.6074	52.0399	67.7479	64.8225	79.6159	87.599	79.9009	51.6178	53.9181	31.3072	42.6059	43.2172	38.8615	23.6903	33.2648	23.276	-0.606173	-1.02322	0.627523	-0.928585	-18.6588	-13.2498	-1.08655
ySNP47	Zm00001d024593	10	79588608	79589422	LSM2	Sm-like protein LSM2 [Zea mays]	0	0	0	0	0	0	0	0	0	0	0	0	0	0	0	0	0	0	0	0	0	NA	NA	NA	NA	NA	NA	NA
ySNP47	Zm00001d025412	10	117864859	117874556	0PRT2	Nicoti0te phosphoribosyltransferase-like protein [Zea mays]	16.8218	20.0962	19.1315	13.7668	10.5767	26.2678	9.20432	5.87794	7.5827	17.8357	16.1899	13.6562	14.7436	4.84215	8.80745	12.1467	17.0793	10.4487	14.9706	13.4493	14.6368	0.410809	8.83718	0.0249918	-4.07898	-0.199044	-1.68848	0.56109
ySNP48	Zm00001d023301	10	2367346	2373030	GAUT7	PREDICTED: probable galacturonosyltransferase 7 [Brachypodium distachyon]	7.97492	7.36675	8.3657	0.25062	0.509284	0.379158	54.2486	67.1905	54.3201	1.63705	2.9391	1.4889	3.69727	9.38606	7.92025	29.4551	48.7581	53.3054	17.9539	8.31261	12.0205	2.28513	-0.00614054	-0.988944	-1.22756	0.484667	1.47115	-0.230838
ySNP48	Zm00001d024588	10	79474689	79478403	PVA13	vesicle-associated membrane protein-associated protein A [Zea mays]	44.808	58.0767	46.399	2.0276	2.19747	3.47694	114.936	106.075	115.784	4.31841	3.42812	2.65073	57.9428	74.5545	73.6889	86.8739	99.3423	97.5927	35.9158	37.5054	31.1406	-0.76018	16.0643	1.1914	-2.74638	0.895776	0.719349	-7.00784
ySNP48	Zm00001d025413	10	117927675	117931068	RPS10	40S ribosomal protein S10 [Zea mays]	211.829	200.399	184.519	34.1691	59.9844	41.9883	300.053	363.007	321.972	225.664	375.019	176.704	115.225	164.954	167.68	189.038	224.594	269.758	71.9289	81.2765	52.3712	-3.77834	-0.394219	-0.303657	-1.65563	1.10965	3.54048	-5.18455
ySNP48	Zm00001d025414	10	117933309	117935123	-	OSIGBa0160I14.1 [Oryza sativa Indica Group]	1.57363	4.19565	2.53827	0.640555	2.14106	0.967791	2.61862	0.956004	1.21447	1.88756	3.55122	0.930014	0.154036	0	0.113776	0.270286	0.176445	0.527712	44.1673	32.2217	24.7666	-0.264201	-0.563833	-0.689081	-2.15114	0.477269	6.4864	-2.24817
ySNP48	Zm00001d025566	10	122509798	122511588	-	PREDICTED: FK506-binding protein 2 [Oryza sativa Japonica Group]	7.3342	2.4251	2.45163	22.6547	32.1372	38.1022	0.541411	0.850967	0.916776	32.7338	45.4831	44.6984	0.581223	108.451	39.9888	5.22956	10.0371	0.582813	22.9617	61.4353	86.5965	-0.98919	2.2581	1.42518	0.876909	-0.269352	-2.93313	2.30797
ySNP48	Zm00001d025567	10	122515167	122515565	-	PREDICTED: arabinogalactan protein 1-like [Zea mays]	1.02134	1.13514	3.72941	42.5571	16.0157	78.6619	4.95277	2.06482	3.86157	4.71098	1.5222	2.19142	1.66012	3.99173	5.1559	8.04224	3.65716	6.02372	0.389542	0.80854	0.864455	46.594	3.72063	0.244312	-0.580262	1.99859	0.0793678	1.2669
ySNP48	Zm00001d025571	10	122637949	122641587	-	TPA_inf: HN1-like protein isoform 1 [Oryza sativa (japonica cultivar-group)] [Oryza sativa Japonica Group]	46.4318	48.9765	46.2766	15.4168	27.9785	14.8149	146.197	165.787	172.414	92.6223	127.554	90.3142	16.7216	32.6909	31.0365	71.877	91.4359	109.948	20.4462	19.2671	16.2463	-1.12198	-1.09585	1.67654	-1.13215	0.792802	2.89294	-6.12423
ySNP48	Zm00001d025572	10	122641857	122645133	STP5	Sugar transport protein 5 [Zea mays]	1.27632	0.0906823	0.932797	0	0	0	0.995118	0.801216	1.3573	0.173708	0	0	72.1211	167.739	148.333	73.1281	35.6608	7.26501	43.3456	13.6538	15.7221	0.420524	NA	4.73576	-1	0.594102	-2.51576	-0.860685
yEpi1-1/yEpi2-1/yEpi13-1	Zm00001d006788	2	216679787	216681518	sld5	D0 replication protein-related [Zea mays]	6.09393	2.75186	6.82997	1.59293	1.56407	2.05861	34.0168	38.8675	36.5045	9.46832	16.682	2.94743	9.5142	12.1903	12.2448	5.45968	9.98379	18.6459	2.28712	3.16636	1.16315	1.44047	33.2815	0.0257254	-2.80792	1.04067	4.82933	-3.55671
yEpi1-1/yEpi2-1/yEpi13-1	Zm00001d006789	2	216682212	216695178	rxt3	zinc finger CCCH domain-containing protein 13 isoform X2 [Aegilops tauschii subsp. tauschii] [Aegilops tauschii]	60.5434	58.2297	56.34	21.335	29.2739	28.4394	86.1369	66.1708	73.8362	54.698	60.7535	54.6928	63.7954	53.6418	42.2982	62.7741	55.712	57.4868	31.4323	21.8125	23.9694	-2.63347	0.789765	-0.232156	-1.00171	-3.23441	-0.497377	-0.551571
yEpi1-1/yEpi2-1/yEpi13-1	Zm00001d006790	2	216755234	216764301	MPK14	Mitogen-activated protein ki0se 16 [Zea mays]	51.8651	45.8066	46.0491	8.73574	6.20239	12.9854	82.6439	61.6216	71.5974	18.5519	10.1724	13.9385	76.7698	49.7069	62.1782	92.5776	74.2957	76.0702	24.2645	26.8254	32.9873	-0.919935	4.35497	-0.0509317	-0.101115	-0.0783514	-0.805873	5.81229
yEpi1-1/yEpi2-1/yEpi13-1	Zm00001d006791	2	216766315	216767167	DIVARICATA	PREDICTED: protein REVEILLE 1-like [Zea mays]	7.26841	5.19991	3.41377	16.8017	3.90285	6.59567	0	0	0	30.1537	13.4366	17.4012	0.499598	0	0	0	0	0	0	0	0	-2.727	-0.582472	NA	-0.525688	-1	NA	NA
yEpi1-1/yEpi2-1/yEpi13-1	Zm00001d006794	2	216884923	216888186	-	tR0/rR0 methyltransferase (SpoU) family protein [Zea mays]	18.2338	17.7837	14.2601	4.88683	2.45285	4.73134	25.1525	31.8515	30.5888	21.3369	16.3625	15.4896	27.0522	17.0932	19.0541	26.2461	20.2726	27.4992	9.34164	10.651	6.0863	-16.6568	0.872234	0.623021	-1.35092	-0.606203	1.41953	-5.97231
yEpi1-1/yEpi2-1/yEpi13-1	Zm00001d006796	2	216891193	216892807	Os05g0140800	0D(P)-binding Rossmann-fold superfamily protein [Zea mays]	954.552	1076.94	933.173	4.51341	3.67588	2.73982	0.0498453	0.098635	0.140454	17.4685	7.87684	18.8157	0	0	0.0102517	0	0.0769413	0.104883	0	0	0	-1.34938	-3.2353	2.71427	1.2809	NA	1.72632	NA
yEpi1-1/yEpi2-1/yEpi13-1	Zm00001d006797	2	216892700	216916575	GUP1	PREDICTED: GUP1 isoform X1 [Zea mays]	22.0949	13.7452	17.9294	1.07222	1.6055	1.63432	29.6812	27.2917	26.8404	5.0708	4.82893	5.70501	16.6166	16.9632	16.9098	32.7936	26.1651	27.0498	12.7603	9.51946	5.81148	NA	1.10809	-1.37776	6.24422	0.691864	-0.733058	-3.28828
yEpi1-1/yEpi2-1/yEpi13-1	Zm00001d006798	2	216935090	216965626	CHR12	PREDICTED: probable ATP-dependent D0 helicase CHR12 isoform X2 [Zea mays]	37.8136	25.2121	32.8227	9.07128	13.5215	15.0776	59.7374	61.1497	46.2498	28.3696	32.3253	36.0886	78.7434	43.8693	51.2801	37.0569	39.4506	29.4447	23.7903	19.1134	21.6043	0.207881	1.69933	-20.0993	2.90271	-0.574998	-7.36016	0.0651999
yEpi7-1	Zm00001d029121	1	58944824	58953954	CLPR3	ATP-dependent Clp protease proteolytic subunit [Zea mays]	24.044	45.248	36.6126	16.2684	18.9253	17.7413	31.9082	34.5197	33.2973	31.041	35.9477	26.1021	16.1423	19.9736	15.7479	24.876	25.1107	27.7562	25.1178	17.8261	16.3701	0.185488	0.108763	0.0638176	-3.01311	-1.20587	23.5428	-1.39936
yEpi7-1	Zm00001d029123	1	59023014	59027798	Rad9a	cell cycle checkpoint control protein family [Zea mays]	13.2343	20.1542	21.0188	2.96124	6.22573	3.78429	31.3501	27.3248	25.7847	5.28004	10.872	5.53586	1.68081	4.80406	2.01212	11.9587	11.4145	16.6279	1.64507	1.61797	2.28268	1.24987	-0.495757	-1.76522	-0.908503	-0.787848	18.1602	48.05
yEpi7-1	Zm00001d029124	1	59028004	59030626	RPS21	40S ribosomal protein S21 [Zea mays]	72.5056	38.8791	56.2933	10.0575	5.87177	7.12438	127.12	143.134	131.764	97.0887	116.345	73.2382	65.0039	79.8289	127.942	95.0822	118.775	141.174	57.8699	65.8079	38.0248	0.0357428	-0.40149	-0.420044	-3.47721	7.49083	2.89077	-6.00002
yEpi7-1	Zm00001d029125	1	59070431	59071868	-	PREDICTED: desiccation-related protein PCC13-62-like [Setaria italica]	0.133506	0.306882	0.699758	0	0	0	0	0	0.103385	4.28585	0	0	0	0	0	1.21272	0.469297	0.286406	4.39404	2.11016	2.22079	5.53209	NA	NA	-1	NA	-1.49203	-0.903119
yEpi7-1	Zm00001d029126	1	59132630	59134681	CCH	PREDICTED: neurofilament heavy polypeptide-like isoform X1 [Zea mays]	0.329168	0.883345	1.42893	0	0.147696	0	29.7579	7.58191	19.6387	0.0646063	1.06214	0	8.70758	10.3456	11.3139	64.2924	35.2082	32.3006	58.554	68.2607	69.7841	2.96899	-1	0.0873751	-1.12953	2.1823	-1.19995	1.31388
yEpi7-2/yEpi11-2	Zm00001d029822	1	88696531	88703297	CYP97C1	cytochrome P450 14 [Zea mays]	2.69377	4.58005	3.80307	0.333016	3.46799	0.663802	16.7891	22.7546	18.2462	3.34421	10.2256	3.48117	21.9342	18.3825	19.9143	16.2583	20.6467	16.0511	17.3938	18.559	18.3894	0.176177	-0.788971	-0.511487	-0.960194	-0.137458	-1.09441	0.708883
yEpi8-1	Zm00001d029134	1	59846904	59876808	-	CW-type Zinc Finger [Zea mays]	7.92321	10.3465	7.04485	4.93634	7.06341	6.78509	7.13154	9.62875	7.76391	24.1314	31.9765	33.4658	10.3082	19.218	9.34203	5.07228	13.8945	5.68949	1.86134	1.69524	2.35724	-1.72493	0.738306	-0.493539	1.3797	-1.21688	-0.860078	6.97099
yEpi8-1	Zm00001d029138	1	60182624	60186722	At5g19830	Peptidyl-tR0 hydrolase mitochondrial [Zea mays]	20.758	14.6379	25.4834	9.33865	4.73904	8.32172	35.5552	26.4161	31.7819	12.0425	6.55528	9.92163	23.5016	21.2103	13.4546	20.9411	12.845	24.4922	11.3534	7.96042	5.59937	2.54421	0.557819	0.17426	0.226978	-7.7696	1.87724	-2.39172
yEpi9-1	Zm00001d029170	1	60930751	60934311	SODCC.3	Superoxide dismutase [Zea mays]	736.195	207.267	392.561	26.5484	13.3201	19.2354	322.262	229.728	387.822	96.3075	62.5553	59.3226	649.263	807.267	689.485	539.348	293.568	473.118	315.186	151.361	129.487	-0.299362	-0.105666	2.41699	-1.19156	-0.490873	0.461066	-1.26703
yEpi9-1	Zm00001d029173	1	60948887	60951140	At3g12390	0scent polypeptide-associated complex alpha subunit-like protein [Zea mays]	239.594	117.472	157.151	70.3375	46.382	64.7756	309.506	321.728	335.744	408.319	368.526	249.016	347.596	265.114	305.657	266.822	278.434	317.14	92.0148	88.2914	70.4965	-0.350167	0.535643	3.29346	-7.00669	-0.0169305	7.66662	-10.5585
yEpi9-1	Zm00001d029174	1	60997143	60999925	NOP56	nucleolar protein NOP56-like protein [Zea mays]	176.078	171.036	190.129	29.124	24.968	29.766	232.03	224.315	220.416	98.1347	99.7281	67.9886	76.703	95.2954	70.4327	101.551	111.444	134.73	29.8601	35.7519	24.4438	6.57367	1.30894	-2.01072	-38.8409	-1.6745	5.70764	-2.83858
yEpi9-1	Zm00001d029177	1	61041496	61045956	NUG2	nucleolar GTP-binding protein 2 [Zea mays]	191.33	127.466	146.718	39.8386	37.8763	47.7074	161.364	117.666	134.742	141.248	128.645	151.563	107.783	76.3259	59.4356	134.364	83.3045	103.716	31.9056	20.407	18.9917	-0.397103	9.02027	-0.218466	2.63701	-2.07385	-0.200481	-1.24617
yEpi9-1	Zm00001d029180	1	61214711	61233546	INO80	D0 helicase INO80 [Zea mays]	27.9428	24.7104	28.3691	3.7415	6.12009	4.98468	49.7365	28.5614	35.5659	27.3906	27.9515	22.5908	28.4222	98.523	26.8184	28.0355	24.9912	26.394	13.9397	4.7184	11.7435	1.26375	0.0453133	-0.338416	-18.1128	-1.04576	-0.0783893	0.523677
yEpi10-1	Zm00001d029257	1	63916533	63917166	-	unknown [Zea mays]	11.0016	29.0986	23.2496	6.57635	7.19676	8.49281	9.24085	13.0396	11.5182	8.69683	10.4966	7.98289	29.1636	19.6004	16.2556	9.7029	20.1271	13.3804	9.87474	16.2679	11.7836	0.353593	5.17803	0.199006	-1.79337	-1.69954	-0.294434	-0.402851
yEpi10-1	Zm00001d029260	1	63980030	63987392	SCAB1	Stomatal closure-related actin-binding protein 1 [Zea mays]	27.6727	25.4755	27.5211	0	0.539349	0.744229	34.2053	25.5718	28.4435	0.34983	3.63677	0.188418	7.8543	18.1019	17.6465	16.8353	20.7884	21.305	6.66219	4.51434	6.52663	0.862019	1.75973	-0.334774	-1.09821	0.911121	1.26135	0.873768
yEpi10-1	Zm00001d029263	1	64042656	64045687	CPN10	PREDICTED: 10 kDa chaperonin-like [Setaria italica]	22.6906	28.0913	33.2163	1.81326	1.66035	1.42454	98.7356	108.363	100.006	4.50628	7.00873	5.12202	21.2382	37.826	45.0158	43.1009	71.3231	86.1654	10.2614	18.4995	4.41416	2.89791	-4.08436	-0.736186	-0.507891	1.86687	2.05182	-2.41954
yEpi11-1	Zm00001d029386	1	68538003	68540116	mhpC	PREDICTED: monoacylglycerol lipase ABHD6 [Zea mays]	0	0	0	0	0	0	0	0	0	0	0	0	0	0	0	0.0665777	0	0	208.045	182.081	498.498	NA	NA	NA	NA	NA	-1	23.3742
yEpi11-1	Zm00001d029391	1	68665582	68667909	DAHPS1	Phospho-2-dehydro-3-deoxyhepto0te aldolase 2 chloroplastic [Zea mays]	0.120029	0	0	0	0.0200597	0	0.801121	0.0607163	0.308121	0	0	0	0	0	0.0257887	0.97726	0.0524203	1.38568	195.843	304.652	24.5082	-1	-1	-0.331705	NA	NA	1.88323	-4.1493
yEpi11-1	Zm00001d029392	1	68668722	68675980	At1g78280	F-box protein [Zea mays]	47.9118	34.066	36.9953	4.10921	5.02796	4.49471	29.5413	25.1576	26.522	21.4431	26.5071	15.9001	44.057	30.7666	32.0648	37.4259	33.625	31.3145	28.1202	18.4712	24.1547	-0.576865	-0.160828	-0.37752	-3.18915	-0.804632	-2.21577	0.178044
yEpi11-1	Zm00001d029393	1	68678959	68683422	COX6B-1	uncharacterized LOC100192808 [Zea mays]	87.1362	45.7162	45.3398	10.7747	11.8173	12.3178	107.785	128.3	130.849	86.282	106.384	78.1901	173.573	274.028	213.026	157.205	181.924	161.024	110.128	152.564	89.804	-1.01818	1.96011	1.24852	-1.80509	-0.214516	-0.690958	-1.95786
yEpi12-1/yEpi7-2/yEpi11-2	Zm00001d029818	1	88440568	88462988	CCDC132	uncharacterized LOC100384314 [Zea mays]	26.7462	41.0304	41.0812	17.5603	17.9246	18.81	42.6399	47.3935	40.925	22.8559	45.2275	19.7831	24.7455	39.6764	32.7267	42.8121	49.8585	44.6498	31.3878	39.2698	25.7433	1.00712	5.86158	-1.72154	-1.27471	0.0690816	-0.478403	-2.43225
yEpi12-1/yEpi7-2/yEpi11-2	Zm00001d029820	1	88468178	88468588	SMR1	PREDICTED: cyclin-dependent protein ki0se inhibitor SMR1-like [Setaria italica]	6.20085	4.62569	9.48551	0.0916133	1.39212	0.779899	31.1015	24.4096	29.0178	0	3.44338	0.919731	2.87351	1.06998	0.731747	10.6169	4.8745	9.4644	7.27827	6.65406	4.17215	5.17059	0.0584871	0.377241	-0.465797	-1.37509	0.598606	-8.95213
yEpi13-2/yEpi3-2	Zm00001d025853	10	131518170	131523882	At4g26100	Casein ki0se 1-like protein 6 [Zea mays]	21.1296	23.5676	26.7331	2.05014	3.09013	2.31883	25.6288	22.5108	27.5182	5.78655	7.70418	5.29193	13.9802	12.7937	16.2168	17.2541	21.4873	22.7345	5.55346	6.00532	4.31781	3.59681	-0.483283	2.21193	-1.51586	4.76987	1.58922	-6.46915
yEpi13-2/yEpi3-2	Zm00001d025857	10	131577849	131579681	RPL14A	PREDICTED: probable 60S ribosomal protein L14 [Oryza sativa Japonica Group]	82.8425	47.3458	69.6492	9.49888	4.71619	8.42965	214.285	215.89	190.414	43.7737	51.9539	26.5109	73.4075	88.4471	111.561	146.325	162.432	231.511	77.4375	79.6099	41.5762	0.256648	0.552875	-30.7463	-5.22065	4.07379	9.57723	-34.0146
yEpi13-2/yEpi3-2	Zm00001d025859	10	131636162	131638435	Dctpp1	MazG nucleotide pyrophosphohydrolase domain protein [Zea mays]	2.66629	10.8602	8.66213	3.51174	9.84997	7.59425	0.386688	0.795024	1.2473	5.90101	31.2978	16.0328	224.615	320.944	193.102	31.5719	38.5234	17.5835	33.4329	101.223	79.6839	0.463483	0.28822	3.21523	-0.202123	-1.65427	-5.02454	0.364538
yEpi13-2/yEpi3-2	Zm00001d025860	10	131691269	131694141	-	uncharacterized protein LOC100217228 [Zea mays]	8.86889	22.913	5.57111	24.711	22.8817	16.733	19.9397	39.5093	32.2976	61.2782	87.2932	28.3095	76.0673	69.8193	68.5841	33.7931	40.7682	28.3557	57.297	69.841	85.4073	-1.46963	-7.72239	0.26297	-3.53459	-1.39538	-2.55908	3.48188
yEpi13-2/yEpi3-2	Zm00001d025862	10	131802312	131805026	THA1	L-allo-threonine aldolase [Zea mays]	63.8988	22.2896	45.3446	33.9615	19.8129	33.0893	33.6324	4.29352	18.5266	52.3151	19.7584	47.8413	32.711	0.895525	19.1008	16.1408	4.85014	14.4636	12.7645	3.24958	4.5103	0.108168	0.876705	-0.0297434	0.725168	0.14443	0.702918	-0.735004
yEpi14-2	Zm00001d025445	10	118846883	118849706	Acot13	acyl-CoA thioesterase 13 [Zea mays]	19.8611	28.9025	24.2131	21.3174	22.9915	29.3618	20.7836	24.7618	27.0262	17.9511	10.5092	20.7065	68.4523	63.5276	49.3601	79.6252	73.3663	44.988	33.1889	34.5773	34.4149	-0.0373175	8.61061	2.13838	1.74048	-6.75358	-10.0682	0.766041
yEpi14-2	Zm00001d025449	10	118888454	118897515	YDA	PREDICTED: mitogen-activated protein ki0se ki0se ki0se YODA-like isoform X1 [Setaria italica]	11.4635	16.8903	13.4142	5.17508	7.74079	6.97371	18.7448	20.29	19.1773	8.23757	13.4388	9.03667	60.2876	41.6826	30.0243	20.7116	24.2309	17.9505	14.0585	12.8184	13.0424	-0.281084	0.402054	-0.44016	-0.692726	-2.25325	-2.56916	-0.638802
yEpi14-2	Zm00001d025450	10	118965103	118969340	Os04g0438700	Zinc finger CCCH domain-containing protein 28 [Zea mays]	30.5245	57.8705	52.8161	12.1681	13.0333	12.6563	65.786	70.1972	67.865	15.4301	23.9066	15.6132	51.7421	52.3176	39.2603	48.065	48.3545	44.9897	19.5617	19.0716	16.0952	0.630342	0.12847	-0.0574091	-0.95681	-44.378	-22.25	-13.1477
yEpi15-1	Zm00001d034747	1	301229954	301230535	-	PREDICTED: 21 kDa protein-like [Brachypodium distachyon]	0	0.0850723	0	0	0	0	0.0585867	0	0.0618493	0	0	0	0	0	0	0	0	0	635.819	739.201	448.025	-1	NA	1.11138	NA	NA	NA	-4.63303
yEpi15-1	Zm00001d034750	1	301294415	301300276	APUM24	Pumilio homolog 24 [Zea mays]	48.6254	47.4213	47.9792	6.29755	8.76759	8.05086	76.2109	68.8448	70.4374	29.6674	42.7991	25.144	30.5951	33.1266	29.969	45.0177	42.1937	49.8295	14.0526	8.44744	9.37326	-0.0733185	0.419658	-0.567561	-1.68893	-1.49461	4.40774	-0.669656
yEpi15-1	Zm00001d034751	1	301301000	301302433	GATA16	C2C2-GATA transcription factor, partial [Zea mays]	109.567	136.497	184.099	27.0932	23.6935	23.2334	225.528	175.194	209.493	102.021	54.0626	55.7519	24.931	27.5783	32.5046	132.777	96.4961	161.838	34.8047	29.4865	21.7288	4.53524	-1.27062	0.362834	-0.929555	4.72163	2.60197	-3.91744
yEpi15-1	Zm00001d034752	1	301368751	301374143	-	hypothetical protein ZEAMMB73_Zm00001d034752 [Zea mays]	8.28343	16.5897	18.582	2.90581	5.20107	3.96982	13.2332	18.302	15.3429	6.26976	4.9994	5.53235	8.07465	11.1941	8.53792	9.89593	15.3749	13.6045	4.02045	6.49912	4.35949	1.47973	-0.0728663	-0.167602	-0.16095	-0.702979	0.353745	-0.726438
yEpi15-1	Zm00001d034756	1	301479326	301479550	-	uncharacterized LOC100126915 [Zea mays]	15.1022	15.3153	18.1061	0.360807	0.784804	0.863379	144.408	88.0317	118.763	2.64295	3.17367	1.07521	202.581	67.4312	163.528	157.12	150.903	201.063	80.7789	74.1576	59.9779	27.2037	1.37064	0.0902114	-6.90794	0.422083	15.1361	-5.28308
yEpi15-1	Zm00001d034757	1	301487821	301492681	ETFA	Electron transfer flavoprotein subunit alpha mitochondrial [Zea mays]	38.8222	43.7046	37.5221	43.6164	71.9622	67.4823	67.1812	61.2119	65.4082	61.7901	86.7432	58.3438	112.04	88.7096	88.3743	55.246	42.4865	45.8724	29.3211	19.7285	22.6614	-1.53257	0.683916	0.405968	-1.27623	-1.02874	-0.469287	-0.38852
yEpi15-1	Zm00001d034758	1	301493011	301499561	ACBP4	Acyl-CoA binding protein [Zea mays]	38.0367	34.4945	40.0607	12.4431	15.0649	13.642	57.996	44.4842	50.355	53.2353	60.6628	51.2202	45.9311	47.7898	48.4415	75.918	67.5015	62.7102	43.3715	30.3971	38.5546	2.14278	-0.0854103	-0.131014	-1.54262	1.70121	-2.13854	0.257467
yEpi15-1	Zm00001d034759	1	301498813	301507653	rngB	PREDICTED: host cell factor isoform X1 [Setaria italica]	38.4229	25.0147	30.7177	6.07682	9.80418	6.74207	46.1526	40.497	42.6327	18.284	27.3989	22.2078	27.7524	30.8226	25.8014	32.0424	33.3775	32.9427	17.3504	12.6279	12.4136	-0.14932	-0.643047	-0.244751	-0.139018	-2.27088	0.348673	-1.09074
yEpi15-1	Zm00001d034760	1	301511660	301512118	FDX3	ferredoxin-3, chloroplastic precursor [Zea mays]	785.852	702.734	509.726	324.769	485.229	416.728	271.004	222.983	277.966	1069.66	1585.27	1148.85	532.073	529.675	422.711	385.828	290.844	320.816	324.221	345.615	242.515	-5.64421	0.146187	1.28995	-0.692816	-90.2005	-0.368895	-8.63824
yEpi15-1	Zm00001d034761	1	301513634	301517295	ACT3	PREDICTED: actin-3 [Oryza sativa Japonica Group]	93.2374	65.8818	65.9937	40.4702	73.4706	50.1228	155.414	135.961	152.003	144.327	533.444	179.318	666.047	1104.88	967.768	265.072	219.091	201.109	78.7086	70.2299	93.8537	-0.991817	-0.415	0.649257	-0.820151	0.375107	-1.78214	4.57248
yEpi16-1	Zm00001d044203	3	221806137	221811113	Os01g0618400	P-loop containing nucleoside triphosphate hydrolase superfamily protein [Zea mays]	18.6071	13.7363	15.985	1.94833	2.01011	1.52658	40.5451	43.8941	38.8583	7.0769	9.9418	7.28235	12.3652	15.4501	11.5858	23.1033	26.2521	33.7613	14.2132	11.3501	9.03968	-0.0766443	-14.6522	-2.00737	-0.856577	-1.50526	5.76944	-2.61393
yEpi16-1	Zm00001d044208	3	221908792	221912374	Os01g0618400	PREDICTED: DEAD-box ATP-dependent R0 helicase 25-like [Zea mays]	6.94891	8.96524	10.5619	1.64587	2.21409	2.55094	11.4993	20.7889	13.6902	6.81586	7.07366	8.66308	12.1884	35.9695	21.3425	9.73349	41.7879	18.2093	20.607	19.2098	18.9296	2.58376	2.18563	-0.52832	13.3305	-0.230136	-0.471161	-1.40114
yEpi16-1	Zm00001d044211	3	221916358	221923940	PGMP	Phosphoglucomutase chloroplastic [Zea mays]	66.6294	72.4116	81.5152	1.55214	1.09571	1.47443	29.0808	31.3251	32.3582	5.6897	5.70951	5.57177	4.75941	30.7343	14.5899	27.8148	82.5525	54.6671	18.4204	17.2434	12.6598	4.14882	0.659474	1.92071	-12.9042	-0.243079	-0.0188745	-8.78841
yEpi16-1	Zm00001d044212	3	221942241	221944571	AKR1	auxin-induced protein PCNT115 [Zea mays]	61.6136	89.9067	65.6405	26.4148	26.0144	28.1166	294.619	266.017	298.23	177.055	278.334	98.9614	143.151	299.414	230.841	272.614	411.433	363.863	63.8691	84.367	51.5849	-0.715344	9.50039	1.25245	-2.54213	0.122328	0.314645	-2.19859
yEpi16-1	Zm00001d044213	3	221965077	221974763	CPSF73-II	PREDICTED: cleavage and polyadenylation specificity factor subunit 3-II isoform X1 [Zea mays]	24.6811	19.6078	25.0428	4.55244	5.31828	5.27203	41.1294	47.0714	38.6334	15.9146	14.8517	13.6411	34.3428	45.043	40.9152	35.5537	47.0675	42.9296	13.5707	13.8035	11.1309	1.14258	0.879214	-1.84011	-3.27794	0.228457	0.28122	-21.9671
yEpi16-1/yEpi62-2	Zm00001d044201	3	221791738	221799935	FTSH9	ATP-dependent zinc metalloprotease FTSH 11 chloroplastic/mitochondrial [Zea mays]	15.374	18.4139	14.8336	6.97822	10.6664	8.49607	25.364	27.0766	26.4462	27.4089	35.6274	24.5014	28.0163	24.2659	24.5529	27.474	29.4668	26.3821	17.3977	14.0406	17.9558	-1.35554	-0.176913	0.263835	-1.70757	-0.846981	-2.09589	1.33243
yEpi17-2	Zm00001d052838	4	202307193	202307801	NFYC2	PREDICTED: nuclear transcription factor Y subunit C-1-like, partial [Setaria italica]	19.1181	25.5223	22.1393	1.12164	1.65282	1.18895	40.4325	39.48	45.2616	3.06166	3.16775	2.21348	13.7974	20.0592	14.2064	23.2751	15.9364	23.6236	9.78472	11.6506	3.02937	-0.0564787	-0.746555	11.1393	-16.9902	-0.869365	1.09498	-8.24092
yEpi17-2	Zm00001d052840	4	202386306	202392553	SFH6	Phosphatidylinositol/phosphatidylcholine transfer protein SFH13 [Zea mays]	126.788	44.1844	85.52	1.25745	1.26936	1.44556	2.06758	1.86815	2.1823	2.83774	1.35915	3.5094	1.04807	5.33175	1.27124	40.4723	83.8128	5.46293	45.1047	28.5565	17.7236	NA	30.5964	2.1505	1.90851	-0.895805	-2.61555	-2.30925
yEpi17-2	Zm00001d052843	4	202399060	202399842	-	uncharacterized LOC100384287 [Zea mays]	0.768218	0.904554	0.76205	0.060949	0.161201	0	0.59319	0.70883	0.706558	0	0	0	0.429745	0.32692	0.0701003	1.63892	3.22525	0.940192	1.51211	3.49028	1.71236	-1.09049	-2.21592	0.960706	NA	-5.99528	-1.88093	-0.797539
yEpi17-2	Zm00001d052847	4	202445149	202447772	WRKY2	PREDICTED: probable WRKY transcription factor 34 isoform X1 [Zea mays]	0.53645	0.885889	1.10514	0.13554	0.272365	0	1.12896	3.02581	1.31447	0.180974	0.415257	0.225024	0	0.389803	0.225703	0.424383	1.32047	1.28046	1.38612	1.62643	0.97191	2.25488	-2.98122	-0.804403	-0.62396	0.158039	0.910705	-4.44721
yEpi17-2	Zm00001d052848	4	202462858	202466951	CSN6A	COP9 sig0losome complex subunit 6a [Zea mays]	9.50293	7.99501	11.1708	2.41668	2.55436	1.73043	33.1934	38.7493	37.2822	9.41159	14.5786	7.70012	10.3813	13.5529	13.7945	16.2928	21.9382	24.6033	8.17017	9.79313	5.9581	3.21211	-10.9691	0.471863	-1.66247	1.15235	1.94414	-3.72598
yEpi17-2	Zm00001d052851	4	202584989	202599440	PEX5	Peroxisome biogenesis protein 5 [Zea mays]	18.6682	20.4098	19.2565	4.26246	11.7303	13.27	17.6673	20.065	18.9791	13.7701	19.5266	13.5545	46.9026	43.2952	36.8816	26.1168	30.6078	22.9625	13.6918	13.305	11.2183	-0.324318	1.41234	0.09425	-1.07491	-4.55592	-2.40474	-11.7926
yEpi17-2	Zm00001d052853	4	202635306	202636943	-	uncharacterized LOC100383376 [Zea mays]	0	0	0	0	0	0	0	0	0	0	0	0	0	0	0	0	0	0	0	0	0	NA	NA	NA	NA	NA	NA	NA
yEpi18-2	Zm00001d016873	5	178968180	178971530	BHLH82	Transcription factor bHLH82 [Dichanthelium oligosanthes]	32.3293	16.4664	23.7084	3.34299	2.60631	2.33349	1.96622	2.40863	2.17252	16.7045	18.5251	16.9429	0	0.071285	0	8.43528	5.17057	2.41617	4.63545	2.70632	1.89722	-0.0869364	-1.74067	-0.0674185	-0.738122	-1	-2.68737	-1.83882
yEpi18-2	Zm00001d016876	5	179111776	179112984	ASIL2	PREDICTED: trihelix transcription factor ASIL2-like [Setaria italica]	5.23037	9.90971	8.82569	2.4208	2.65236	1.69827	10.5726	13.5873	13.1255	6.71161	6.27659	4.97092	8.46733	7.27807	6.30844	10.0235	8.47034	10.3391	6.16847	4.04714	4.89296	0.53668	-7.24068	0.693587	-7.00277	-2.63065	1.40636	-0.202558
yEpi19-2	Zm00001d037307	6	120259268	120263325	-	NHL domain-containing protein [Zea mays]	42.3021	90.5717	80.453	32.5705	84.2636	30.8863	20.9534	30.4365	29.8556	110.36	211.765	119.566	2.77306	4.7365	2.86133	22.583	31.0486	32.4706	20.1183	17.6554	18.6658	0.580743	-1.06516	0.877475	-0.818437	-0.910091	1.33593	-0.179489
yEpi19-2	Zm00001d037313	6	120400514	120406900	JMJ703	Jumonji transcription factor, partial [Zea mays]	12.6205	11.4316	12.3044	3.53681	6.04162	4.17561	22.9868	22.0113	20.4599	11.9269	15.046	12.2934	16.0099	14.959	11.4365	18.8542	20.9715	18.9444	7.16447	6.06429	7.77357	0.468154	-0.489944	-4.18051	-0.765008	-7.70335	-0.914781	2.10728
yEpi20-2	Zm00001d037340	6	122064078	122065011	Y-3	Os06g0256800, partial [Oryza sativa Japonica Group]	13.9779	10.8273	29.3132	0.933394	0.336596	0.320871	10.2998	12.8695	10.8829	3.63154	1.4144	1.18769	4.35566	0.97371	3.91712	6.9199	9.9323	12.3349	2.37432	2.35334	0.692525	10.7347	-1.0527	-0.546138	-1.20451	0.740661	2.59514	-159.336
yEpi20-2	Zm00001d037343	6	122125235	122136629	PXG4	PREDICTED: probable peroxyge0se 4 [Setaria italica]	27.2672	10.146	19.7767	11.2445	6.51023	15.4471	8.6781	27.5063	15.3509	18.5302	36.8232	20.1837	3.25922	14.2656	6.05864	16.7021	19.5647	21.2159	18.0499	11.4451	15.7168	0.124999	2.77543	-0.291193	-0.819215	-0.491311	2.15357	0.293523
yEpi20-2	Zm00001d037346	6	122234850	122246558	SYD	Chromatin structure-remodeling complex protein SYD, partial [Zea mays]	92.2253	75.5875	80.768	15.0795	31.9061	23.0706	97.7251	82.0248	81.3308	76.5034	95.6867	81.6967	89.8406	88.6438	51.5315	67.2663	71.6415	60.7585	33.9382	25.1789	29.8672	-0.37726	-0.0501849	-1.08841	-0.45856	-63.021	-3.97483	0.0704689
yEpi21-2	Zm00001d019342	7	28745288	28767439	ORTH1	E3 ubiquitin-protein ligase ORTHRUS 2 [Zea mays]	0.080087	0	0	0.121764	0	0.114302	0	0	0	0.275608	0.458523	0.0803523	0	0	0	0	0	0	0	0	0	-1	0.877435	NA	-3.13493	NA	NA	NA
yEpi21-2	Zm00001d019343	7	28785037	28786860	-	Histone acetyltransferase HPA2 and related acetyltransferase [Zea mays]	7.84153	4.57062	8.175	1.10433	1.44211	2.15599	10.6477	12.2013	11.6717	5.04678	6.38939	4.66026	8.63215	9.60852	8.21023	10.4237	9.83421	10.9531	13.5306	8.8131	8.39813	1.2039	5.22696	0.31829	-1.57577	-1.86426	2.79621	-1.17593
yEpi21-2	Zm00001d019344	7	28860759	28862951	-	hypothetical protein ZEAMMB73_Zm00001d019344 [Zea mays]	12.2151	16.8704	24.5177	2.84468	4.09807	2.75234	17.1801	38.6543	28.5633	5.43309	16.7671	6.61796	27.5315	36.5701	33.8505	17.887	35.0214	30.1051	18.4125	42.3706	25.2143	4.28543	-1.14734	0.060179	-0.790917	0.398228	0.426148	-0.432186
yEpi21-2	Zm00001d019345	7	28904863	28906524	LEA14-A	late embryogenesis abundant proteins-like [Oryza sativa Japonica Group]	0	0	0	0	0	0	0	0	0	0	0	0	0	0.594514	0.129664	0	0.0812767	0	219.855	114.198	164.57	NA	NA	NA	NA	-0.563798	-1	-0.0465079
yEpi22-1	Zm00001d037362	6	122863117	122880985	topA	D0 topoisomerase type IA core [Zea mays]	12.7279	14.6012	13.9965	0.638066	1.35611	1.19125	35.1115	22.5639	23.8441	7.14553	8.38559	6.12584	9.99279	11.4118	8.03103	13.3162	15.9643	15.9795	2.49504	0.916291	2.0195	0.354341	0.540831	-0.795947	-2.6446	-3.76493	1.01149	0.397573
yEpi22-1	Zm00001d037367	6	123035723	123040543	At1g04910	O-fucosyltransferase family protein [Zea mays]	18.8701	15.2903	15.3532	7.58078	8.15296	9.62455	10.7524	11.1363	10.7871	7.74963	14.0745	11.6094	2.79608	1.7101	4.968	23.3967	23.6518	18.2482	124.301	68.803	275.178	-0.964898	6.14377	-0.81948	0.220487	4.99996	-41.3684	6.43723
yEpi22-1	Zm00001d037369	6	123081049	123084302	-	movement protein binding protein 2C [Zea mays]	13.5809	15.5804	13.9123	6.10107	9.05021	6.01919	30.6103	37.5811	33.1878	28.0029	36.234	27.5197	42.938	49.2069	50.5929	49.6872	49.0722	39.4163	13.1566	14.8521	12.0627	-0.668562	-1.05553	-0.260484	-1.11742	1.44221	-32.3984	-2.29034
yEpi22-1	Zm00001d037370	6	123118322	123118738	-	PREDICTED: classical arabinogalactan protein 11-like [Setaria italica]	0	0.207165	0	0	0	0	0.06034	0.097574	0.148305	0.112486	0	0	0	0.28416	0.0339633	0	0.217948	0.172437	3463.68	3257.13	4858.95	-1	NA	3.72498	-1	-0.760956	0.582371	14.5099
yEpi23-1	Zm00001d032283	1	220368811	220372532	-	PREDICTED: uncharacterized protein LOC100277248 isoform X1 [Zea mays]	15.1248	25.4559	14.4311	23.5856	34.619	26.1935	13.3408	13.3899	13.3501	54.7768	71.711	59.0785	10.9225	10.1329	10.6589	12.9025	10.9981	11.202	13.8168	9.98618	8.6543	-1.13428	-0.527284	-0.620159	-0.491953	0.332345	-0.785875	-1.69539
yEpi23-1	Zm00001d032292	1	220640971	220642533	-	PREDICTED: homeobox protein Hox-D9 [Oryza sativa Japonica Group]	33.5221	34.3375	36.3167	0.553467	0.172374	0.154363	3.10743	0.207181	1.55405	1.42408	0.323959	0.807198	44.1905	25.5993	51.8733	38.8046	13.6667	16.2008	51.6625	28.274	33.818	5.85442	-1.09452	-0.0712089	-0.121481	1.8265	-0.798381	-0.525921
yEpi23-2	Zm00001d052234	4	184184459	184186027	-	uncharacterized LOC103627751 [Zea mays]	22.3596	19.8	27.4467	1.81793	1.21833	2.02997	16.8419	17.2739	17.0515	4.21255	4.51847	2.97443	20.9703	7.92155	17.0226	34.6949	24.4128	34.4783	35.3492	81.8966	28.9039	4.97494	1.70731	-0.0295737	-9.09449	0.394932	0.957868	-1.27693
yEpi23-2	Zm00001d052237	4	184283129	184292636	At5g10080	Aspartic protei0se-like protein 1 [Zea mays]	16.2158	27.7778	19.893	2.92857	7.18475	4.3649	28.604	53.3444	32.2506	9.88755	17.5702	11.2532	11.8546	12.1507	9.23192	26.2491	38.9985	26.4529	3.64955	2.72809	2.99355	-0.363917	-0.325057	-0.705207	-0.644478	-18.7156	-0.968032	-0.423833
yEpi23-2	Zm00001d052239	4	184363869	184367772	MUB3	NTGP5 [Zea mays]	9.80519	5.43009	7.73036	0.819934	0.91297	0.778809	14.627	14.7568	15.2883	1.34866	2.03059	1.87808	53.6003	45.4434	49.2891	38.3919	25.8908	28.6364	32.3798	27.4433	34.0686	0.0515272	-1.88406	9.1861	0.552714	-0.0570635	-0.560735	1.68424
yEpi23-2	Zm00001d052243	4	184464169	184467579	LAC21	Laccase-14 [Zea mays]	0	0.041693	0	0	0	0	0	0	0	0	0	0	0.0752817	0.692867	0	0	0	0	1.72019	0.0602083	0.78199	-1	NA	NA	NA	-1.24379	NA	-0.130374
yEpi24-1	Zm00001d052958	4	206306308	206307489	-	antimicrobial peptide MBP-1 precursor [Zea mays]	26005.8	36260.2	39518.7	84.1973	58.8553	52.5245	0.144661	0.396968	0.262889	24.5102	7.32269	569.626	0	0.26126	0.0706807	0	0.192774	0.122989	0	0.221868	0	1.63555	-1.49963	-0.0628204	64.4316	-0.458925	0.275997	-1
yEpi24-1	Zm00001d052961	4	206347511	206358362	Os11g0582300	PREDICTED: protein ROOT HAIR DEFECTIVE 3 homolog 2-like isoform X2 [Zea mays]	131.91	29.0702	70.5969	1.42595	0.175178	1.25058	8.97507	5.61104	8.18715	4.23862	0.770119	1.69976	4.63584	8.49666	2.60268	23.1665	7.27574	8.77855	20.1812	1.85338	5.2523	-0.1924	0.719582	0.531563	-0.463949	-2.05323	-0.810857	-0.629097
yEpi24-1	Zm00001d052964	4	206412662	206415299	At4g15470	Bax inhibitor-1 family protein [Zea mays]	11.6521	8.36702	12.5111	7.53921	9.55794	5.08689	13.422	16.0673	14.9272	19.2507	18.0603	14.6736	7.75718	5.58075	9.15649	20.1375	15.7627	17.4107	15.8113	11.8214	5.67951	1.52297	-3.42958	0.138	-6.69	2.28587	-0.24661	-4.07868
yEpi24-1	Zm00001d052967	4	206535429	206538212	EPFL4	EPIDERMAL PATTERNING FACTOR-like protein 4 [Zea mays]	9.02638	7.81435	12.5487	0	0	0	6.18401	5.22398	7.46794	0	0	0	0.113427	0	0.0593257	14.4528	16.0173	15.7029	1.91546	1.8324	1.89421	6.81228	NA	3.67475	NA	0.0460559	0.597994	0.488397
yEpi24-2	Zm00001d017613	5	201699854	201703271	LYK4	Protein LYK2 [Zea mays]	8.79135	4.88009	8.04013	0.0782037	0	0	12.5568	8.94976	10.7299	0.724431	0.443967	0.191996	19.8782	11.7824	15.1136	33.902	18.0727	16.3217	8.55628	7.83586	4.83272	0.615865	-1	-0.0129712	-2.79682	-0.177049	-1.22124	-9.33719
yEpi24-2	Zm00001d017614	5	201741196	201748623	MADS6	bearded-ear 1 [Zea mays]	0	0.579212	0	0	0.61047	0	135.045	104.695	168.514	0.347189	0	0	17.4771	89.1915	68.078	81.5638	118.634	126.922	27.7248	30.9494	36.3352	-1	-1	3.2055	-1	0.41118	1.44711	4.34048
yEpi24-2	Zm00001d017615	5	201775528	201775992	RHA1B	protein binding protein [Zea mays]	0.905691	1.14083	1.08471	1.8408	0.48093	1.26763	1.58254	1.20391	1.26887	1.47613	0.544148	0.476471	86.2161	62.3787	67.6913	63.7039	11.2094	8.45694	7.2453	6.12722	4.98108	0.522667	0.157024	-0.656895	-1.14523	-0.554269	-1.10487	-3.05021
yEpi24-2	Zm00001d017616	5	201801849	201802910	TTG1	protein TRANSPARENT TESTA GLABRA 1 [Zea mays]	6.22665	15.0481	12.2045	4.20548	6.69527	5.22688	13.1456	12.0559	11.2372	7.39762	9.49289	5.6562	12.1585	13.7423	12.0303	11.7299	10.9339	9.29377	5.42612	7.60444	4.87744	0.3553	-0.17953	-2.50262	-2.66225	-1.16191	-5.12078	-1.50376
yEpi24-2	Zm00001d017617	5	201803815	201807716	TIM13	pale aleurone color 1 [Zea mays]	59.5505	40.9129	50.0845	19.2099	16.7255	15.7095	64.8255	84.605	71.7722	93.6476	104.727	61.252	43.0787	54.566	56.3499	49.7815	63.3713	67.4143	30.4007	38.9617	14.8685	-0.015801	-1.81789	-0.297583	-6.848	1.31058	1.59501	-4.62859
yEpi24-2	Zm00001d017619	5	201958424	201958630	-	Glycine--tR0 ligase beta subunit, partial [Anthurium amnicola]	3.64357	7.06375	1.7029	0	0.069493	0.0739047	0.515192	1.00157	1.47457	0.450642	0.0695093	0.283401	3.45597	5.52514	4.82736	9.79169	3.2706	3.25456	0.367562	0.964994	0.551839	-2.13484	1.12697	2.94497	0.122403	0.32555	-1.00492	-0.383102
yEpi24-2	Zm00001d017620	5	201983972	201987023	TOM3	Tobamovirus multiplication protein 3 [Zea mays]	16.7981	34.3765	19.5777	1.25908	15.0928	5.16122	10.4189	14.2986	11.9128	5.24983	26.9747	15.2485	4.79481	20.3414	13.8218	23.8044	35.4133	25.6313	16.8937	23.5283	10.2638	-0.68375	-0.435849	-0.229917	-0.0795192	0.16129	-0.685264	-2.9986
yEpi24-2	Zm00001d017621	5	201994341	201995299	SG1	protein SLOW GREEN 1, chloroplastic-like [Aegilops tauschii subsp. tauschii] [Aegilops tauschii]	4.2863	8.38382	10.6572	1.20062	1.50639	0.900374	8.83715	15.0302	9.93146	1.71504	3.55224	2.30859	7.06946	10.71	9.54935	5.68064	8.92984	7.24533	22.0718	41.8022	27.8315	2.10966	-2.96389	-0.6466	-0.35385	0.362361	-0.0368783	-0.416162
yEpi24-2	Zm00001d017622	5	201997949	201998494	-	OSJNBa0088A01.13-like protein [Zea mays]	3.29791	3.87465	1.56307	12.6068	9.91894	15.5055	0.826564	1.62875	0.861186	3.40461	1.78162	3.28321	14.4437	1.74773	1.98404	3.95161	0.997313	0.73173	4.67142	19.547	5.53166	-7.0161	3.15688	-0.91368	0.850405	-0.962775	-1.17979	-0.884341
yEpi26-2/yEpi28-2	Zm00001d020219	7	100656060	100660194	VDAC1	voltage-dependent anion channel protein1b [Zea mays]	74.487	80.7352	88.2173	13.5167	12.6961	8.47036	234.479	205.856	233.013	116.212	107.365	74.3867	68.7134	63.5352	94.3643	142.617	148.264	197.607	90.704	91.5453	57.3202	3.39497	-11.2986	0.897575	-8.45517	10.9074	18.4755	-80.3563
yEpi26-2/yEpi28-2	Zm00001d020224	7	100781683	100784608	triap1	hypothetical protein ZEAMMB73_Zm00001d020224 [Zea mays]	10.5856	13.6353	14.5251	3.66476	5.12479	4.25504	20.5231	24.8577	21.2875	9.27679	16.3332	11.0574	17.4171	18.1997	12.2238	15.7962	16.1377	17.0161	6.51809	8.15303	5.15457	1.58354	-0.191412	-0.647327	-0.49531	-14.2705	6.14547	-2.66797
yEpi27-1/yEpi28-1	Zm00001d036821	6	102225125	102226357	PG9	PREDICTED: exopolygalacturo0se-like [Zea mays]	0	0	0	0	0	0	0	0	0	0	0	0	0	0	0	0	0	0	258.398	343.754	168.623	NA	NA	NA	NA	NA	NA	-3.10357
yEpi27-1/yEpi28-1	Zm00001d036822	6	102234771	102236003	PG9	PREDICTED: exopolygalacturo0se [Zea mays]	0	0	0	0	0	0	0	0	0	0	0	0	0	0	0	0	0	0	395.267	453.819	253.843	NA	NA	NA	NA	NA	NA	-5.83067
yEpi29-1	Zm00001d046579	9	96779946	96809887	TAF1	Transcription initiation factor TFIID subunit 1, partial [Zea mays]	26.0804	29.6422	31.2761	13.394	17.8334	16.4481	33.0837	35.2901	31.5459	24.1081	28.2301	21.9827	37.0905	33.2253	28.3414	30.0787	31.9606	28.1748	26.9064	23.5417	27.4608	1.91743	0.375904	-2.394	-2.03123	-3.52706	-3.02349	1.32957
yEpi29-1	Zm00001d046581	9	96875356	96896707	At4g10320	Isoleucine--tR0 ligase cytoplasmic [Zea mays]	43.0374	35.7919	40.188	21.6736	26.8898	24.802	71.8214	67.3135	66.663	86.4481	90.2607	73.5107	35.1625	36.7513	32.3117	39.1551	46.0124	47.3864	15.8167	11.1994	10.7132	0.213451	0.199481	-1.28864	-7.78661	-4.58851	1.40075	-1.21057
yEpi29-2	Zm00001d045819	9	41248926	41252992	MRPL46	decoy [Zea mays]	48.8803	30.1482	42.813	9.22553	6.89213	9.37914	80.8167	61.1468	67.2207	27.8314	41.6113	23.7699	31.99	28.4703	32.9823	46.6266	38.7314	59.4936	19.5204	17.9602	7.96744	0.352205	1.13166	-0.382419	-1.58947	1.56384	4.25941	-13.8095
yEpi30-1	Zm00001d028064	1	21883821	21884689	-	uncharacterized LOC100278418 [Zea mays]	6.94754	2.88237	4.92716	4.53334	4.25481	2.43914	29.0065	11.4779	20.0126	13.71	8.05238	6.93158	8.36362	16.074	7.81894	59.5831	21.9003	19.5353	34.8424	37.4169	25.2718	0.00600492	-14.0376	-0.0261947	-1.3962	-1.14128	-1.12552	-8.43514
yEpi30-1	Zm00001d028071	1	21979236	21982123	ERV1	Augmenter of liver regeneration [Zea mays]	19.4842	11.7984	13.0926	45.9477	25.685	32.7168	13.0747	18.2681	14.7662	104.034	90.4044	89.8244	12.2845	13.7734	17.5584	16.2977	20.3514	18.4815	21.8148	20.0527	14.5322	-0.663225	-0.30594	-0.348613	-1.0851	6.08424	0.0774178	-7.26585
yEpi30-1	Zm00001d028073	1	21998704	22006841	QWRF2	Protein SNOWY COTYLEDON 3 [Zea mays]	9.52761	22.0211	17.0032	2.4451	5.44133	4.07437	27.8656	30.5527	27.0299	5.14941	7.762	4.56402	13.3651	18.6876	19.6674	25.4369	28.6648	27.0123	9.97718	9.36771	7.38223	0.196721	0.0875433	-1.62203	-1.44813	1.3682	-0.0239174	-7.51542
yEpi30-1	Zm00001d028075	1	22053668	22059573	NPY2	PREDICTED: transposon protein Mutator sub-class isoform X1 [Zea mays]	48.5257	29.4774	33.8751	8.31446	1.80016	6.5253	99.0058	86.6682	87.7015	11.4738	3.85921	12.1563	19.4497	5.952	16.8846	11.2671	2.62304	12.991	26.7674	22.6472	13.4013	-0.538256	0.450698	-0.832498	1.17925	0.619918	1.39886	-5.4882
yEpi30-2	Zm00001d039319	3	1692002	1706787	der	GTP binding [Zea mays]	13.0153	18.5062	16.3567	7.99339	19.5828	12.9713	20.5682	28.016	23.6847	12.7421	27.4664	17.4487	12.1367	12.2623	10.8055	24.9795	25.6607	21.6089	28.4148	27.6084	27.8141	0.21707	-0.140956	-0.163118	-0.360698	-22.2084	-10.8954	-0.489864
yEpi30-2	Zm00001d039321	3	1752436	1773443	-	SMR domain-containing protein [Zea mays]	17.8027	25.1943	27.844	3.66165	5.95694	4.52655	54.7758	51.6071	50.6445	11.1059	16.399	9.38921	26.9833	31.5085	22.3069	42.9456	40.4197	37.5946	18.7679	21.6994	24.4626	1.71694	-0.246371	-1.60757	-1.64864	-3.0668	-3.23695	2.88521
yEpi30-2	Zm00001d039324	3	1876337	1877401	CRF4	PREDICTED: pathogenesis-related genes transcriptio0l activator PTI6-like [Zea mays]	9.09132	15.5768	19.2623	0.780015	1.56317	1.03311	12.3075	12.3469	14.1323	7.62292	6.51411	4.8982	0.153303	0	0.542652	2.8702	2.09535	5.65683	1.12222	1.98506	0.882376	2.13653	-0.35366	91.6232	-3.91468	6.07947	8.19268	-1.55595
yEpi30-2	Zm00001d039330	3	1992693	2001495	VATE	V-type proton ATPase subunit E3 [Zea mays]	55.8697	25.0024	34.9502	5.43876	5.61141	4.70127	86.0424	55.8764	80.4281	31.4295	31.0215	24.3873	47.9062	40.574	62.8129	140.297	90.9553	119.346	66.438	84.3173	32.213	-0.355452	-9.5435	0.627773	-33.5215	5.06611	0.150797	-4.82844
yEpi30-2	Zm00001d039334	3	2020462	2020899	-	hypothetical protein ZEAMMB73_Zm00001d039334 [Zea mays]	0	0	0	0	0	0	39.7646	4.05528	44.0194	0	0	0	0	0	0.183444	161.703	17.3005	143.966	0	0	0	NA	NA	1.2383	NA	NA	0.754338	NA
yEpi3-1/yEpi4-1/yEpi1-2/yEpi5-1/yEpi14-1/yEpi17-1/yEpi18-1/yEpi19-1/yEpi20-1/yEpi21-1/yEpi6-2/yEpi8-2/yEpi9-2/yEpi10-2/yEpi12-2/yEpi15-2/yEpi16-2	Zm00001d039994	3	22276219	22281890	XYL1	PREDICTED: alpha-xylosidase 1-like [Setaria italica]	29.5662	65.6318	54.4193	0.0392567	0.0868	0.0697243	112.658	91.3497	101.736	4.70908	1.75361	2.43589	22.1009	8.33564	17.8412	43.9826	56.3219	72.6542	3.09038	2.77961	2.13165	0.378215	0.28168	-0.0251195	-0.538295	0.38109	3.64719	-5.17013
yEpi3-1/yEpi4-1/yEpi1-2/yEpi5-1/yEpi14-1/yEpi17-1/yEpi18-1/yEpi19-1/yEpi20-1/yEpi21-1/yEpi6-2/yEpi8-2/yEpi9-2/yEpi10-2/yEpi12-2/yEpi15-2/yEpi16-2	Zm00001d039997	3	22422784	22423236	-	protein NEGATIVE REGULATOR OF RESISTANCE-like [Aegilops tauschii subsp. tauschii] [Aegilops tauschii]	2.28502	3.39462	4.98603	8.43412	1.56108	5.01006	15.3875	9.61219	16.5208	23.2497	3.11382	12.9795	1.40285	17.7861	5.20945	7.38901	12.9538	13.4042	6.44889	5.68555	4.91991	3.86843	NA	1.39246	-0.0200883	-0.535306	1.16189	-3.006
yEpi31-1	Zm00001d043390	3	198588278	198589171	TGA1	tumor-related protein [Zea mays]	49.084	60.4712	52.4137	39.9459	27.9122	38.5295	0.274796	0.384468	0.128523	49.4882	36.8684	26.9383	0	0	0	0.0528533	0.04488	0.202497	0.342102	0.409385	0.286934	-0.41518	0.764589	-3.66747	-2.57373	NA	38.536	-2.63986
yEpi31-1	Zm00001d043392	3	198623276	198633083	PCO5	Plant cysteine oxidase 5 [Zea mays]	25.5688	30.055	31.2429	6.45995	9.93088	7.30285	39.8843	43.8063	41.8169	16.2942	28.8298	15.1458	18.1052	22.6903	20.0014	22.6741	29.4795	25.8409	16.5889	23.6784	16.5128	1.52958	-0.514311	-0.0144683	-1.18322	-0.1729	-0.0693381	-1.02148
yEpi31-1	Zm00001d043395	3	198676500	198679792	-	P0460E08.2 [Oryza sativa Japonica Group]	12.9952	7.54504	10.2165	3.22774	1.72646	2.7587	4.69981	5.58795	5.64038	11.0333	9.33529	9.73333	16.1393	15.1472	19.6048	20.2036	13.7958	12.929	4.32137	3.13809	3.59557	-0.0196756	0.375142	1.11806	-0.531179	7.98671	-1.27055	-0.226763
yEpi31-1	Zm00001d043399	3	198729408	198730004	-	Phosphatidate cytidylyltransferase 1 [Dichanthelium oligosanthes]	0.728413	0.212815	1.37779	0.0932593	0.0681953	0.0397497	12.9193	16.6182	17.1505	0.126834	0	0.085917	27.7402	34.5699	38.4933	60.1575	31.0432	38.7003	3.86807	5.85119	6.25232	3.51894	-3.26984	1.28786	0.354791	2.14893	-0.473995	1.40454
yEpi31-1	Zm00001d043400	3	198764862	198766666	At3g59210	PREDICTED: F-box/LRR-repeat protein At3g59190-like isoform X2 [Setaria italica]	1.81442	9.89322	7.40013	0.281921	0.401472	0.61665	3.82667	20.0228	12.8678	0.37909	1.86243	1.64766	11.6101	45.1365	22.7058	5.29592	21.0561	13.0349	5.68453	14.3481	9.84058	0.382805	4.59974	0.116452	0.710422	-0.338088	-0.0179058	-0.0405727
yEpi31-1	Zm00001d043401	3	198862701	198877772	CDS1	phosphatidate cytidylyltransferase [Zea mays]	16.5848	14.1325	14.3989	0.887735	0.786791	0.87252	19.9529	25.64	20.709	1.85864	1.76433	1.33288	19.9992	24.1533	19.1935	17.3797	19.3063	19.0849	11.6439	15.583	13.7417	-0.782699	0.698557	-0.734103	-10.1494	-1.38788	0.770178	0.065109
yEpi31-2	Zm00001d000178	ctg181	130973	139616	ATG3	autophagy3	29.2116	35.6802	26.3412	44.0296	61.3623	70.9485	52.6814	53.3338	54.4579	73.3934	108.717	69.9226	86.6974	111.442	99.6127	60.1111	70.3248	64.7356	31.6593	39.4043	41.5055	-1.88746	2.10615	4.44617	-1.19651	0.0438907	-0.0944494	1.54259
yEpi31-2	Zm00001d000181	ctg181	247190	251607	-	-	3.98423	1.36137	2.08611	3.37207	4.05539	2.74432	0	0	0	13.7486	6.41881	15.2169	0	0	0	0	0	0	0	0	0	-0.447366	-2.83733	NA	1.40065	NA	NA	NA
yEpi32-1	Zm00001d043962	3	214949006	214956897	-	GBF-interacting protein 1 [Zea mays]	31.4007	40.1738	40.7533	4.23891	7.64834	4.96638	52.263	43.7014	45.9143	12.7553	21.0323	9.14614	36.1992	41.9848	33.0647	32.7888	35.1942	33.4182	19.6004	17.5483	18.0993	1.1321	-0.573257	-0.483077	-1.87208	-2.08355	-0.476629	-0.463013
yEpi32-1	Zm00001d043963	3	215008353	215012223	-	pterin-4-alpha-carbinolamine dehydratase [Zea mays]	28.6356	10.7178	11.5618	3.0042	4.3268	3.4825	32.876	40.1562	35.6529	27.8671	31.7653	27.0933	26.062	38.5372	32.4134	30.7148	33.6438	36.7733	33.2513	35.5214	34.2461	-0.905784	-0.276726	-0.237119	-1.39695	0.0182475	3.13689	-0.123611
yEpi32-1	Zm00001d043965	3	215164803	215168155	MAN1	Man0n endo-14-beta-mannosidase 7 [Zea mays]	31.6378	47.0583	64.3206	0	0	0	20.8682	18.4534	27.8529	0.233717	0	0.764132	232.614	320.515	276.354	174.395	92.2736	50.4664	15.7728	33.7045	19.779	3.23888	NA	6.78501	5.53895	NA	-2.01818	-0.553169
yEpi32-2/yEpi37-2/yEpi38-2	Zm00001d000195	ctg178	200500	206059	mate38	multidrug and toxic compound extrusion38	0.456507	0.677543	0.567765	0	0	0	0	0	0	0	0	0	0	0.136669	0	0.055036	0.177262	0	132.485	55.4028	83.0367	0.00669726	NA	NA	NA	-1	-1.90056	-0.283005
yEpi32-2/yEpi37-2/yEpi38-2	Zm00001d000197	ctg178	215229	218747	TIDP3214	-	21.8395	17.59	26.4802	5.93065	7.06073	6.80181	54.3041	65.8338	58.2851	15.4301	13.9467	10.0116	32.1277	13.6765	28.2143	37.3506	39.2454	49.5284	91.6323	89.9162	67.5229	3.18408	0.541759	-0.309432	-6.30555	0.575813	11.854	-27.0979
yEpi32-2/yEpi37-2/yEpi38-2	Zm00001d000199	ctg178	307830	315976	IDP8101	-	8.81325	15.7881	18.605	0.930666	3.80686	1.68256	17.6405	24.9709	20.1059	1.53496	3.26403	2.43612	10.3066	13.7263	12.4158	15.5281	20.8953	17.3312	12.4298	17.7835	16.3129	1.80771	-0.477161	-0.327347	0.0423613	0.233543	-0.328091	0.450595
yEpi32-2/yEpi37-2/yEpi38-2	Zm00001d037966	6	143777350	143782102	DI19-2	fiber protein Fb2 [Zea mays]	34.7681	48.3935	54.8029	5.30242	6.21115	6.79941	62.6513	51.0251	57.3053	10.5349	9.27939	7.96695	32.9947	30.4733	34.3302	60.7295	57.784	55.6287	50.6244	41.0989	44.8856	1.94079	2.29469	0.0803548	-3.09074	2.05936	-2.46335	-0.20493
yEpi32-2/yEpi37-2/yEpi38-2	Zm00001d037967	6	143821245	143826772	FACE2	CAAX prenyl protease 2 [Zea mays]	14.2743	21.7926	18.391	5.31637	11.0686	5.92204	23.9264	32.2758	29.4068	15.6288	28.808	16.5208	11.9862	25.9956	15.4056	15.5563	23.3133	20.9688	8.27604	14.7008	5.45275	0.0951037	-0.789413	0.312779	-0.864636	-0.511838	0.395505	-1.87888
yEpi32-2/yEpi37-2/yEpi38-2	Zm00001d037968	6	143834712	143836988	-	PAR1 protein [Zea mays]	2.0407	6.36019	3.39701	12.0745	50.9152	52.8543	0.157918	0.168945	0	130.895	188.556	216.598	47.2172	69.9611	74.3291	3.81298	32.7634	8.33301	0.67122	2.14428	1.91143	-0.372004	1.09985	-29.6421	1.97265	1.38411	-0.687741	0.683849
yEpi32-2/yEpi37-2/yEpi38-2	Zm00001d037969	6	143835888	143836243	PI1	Inhibitor I family protein [Zea mays]	0	0	0	0	0	0	0	0	0	0	0	0	0	0	0	0	0	0	0	0	0	NA	NA	NA	NA	NA	NA	NA
yEpi33-1	Zm00001d044605	3	233291107	233293518	FAD7	Omega-3 fatty acid desaturase [Zea mays]	0	0	0	0.0593617	0.0602377	0	0.166332	0.50575	0.151071	1.0795	0	0	5.60457	1.41071	1.97638	6.17928	6.86289	3.86557	144.985	125.598	135.733	NA	-136.529	-1.08992	-1	-0.730238	-7.76907	0.045528
yEpi33-1	Zm00001d044606	3	233293582	233295891	GRXS12	grx_S16-glutaredoxin subgroup II [Zea mays]	10.2619	6.643	9.79406	1.28881	2.75826	1.85959	9.73573	12.271	10.5174	5.19695	11.9584	7.39825	15.0995	15.9798	23.597	8.61606	13.6997	13.4799	25.3149	20.2922	17.66	0.741425	-0.223139	-0.383387	-0.348872	18.3059	0.913542	-2.04812
yEpi33-1	Zm00001d044608	3	233328410	233331483	AS	asparagine synthetase 2 [Zea mays]	162.437	69.6323	102.299	0.392223	0.27889	0.0478317	22.2574	3.28312	10.413	1.45356	0	1.42471	0.206341	1.43171	0.51093	6.45855	0.61192	4.9284	4.315	0.281881	1.40141	-0.296004	-5.07752	-0.24847	0.960303	-0.50286	0.476572	-0.444831
yEpi33-1	Zm00001d044614	3	233442816	233453376	Os11g0104900	Clathrin heavy chain 2 [Zea mays]	81.9373	36.3382	59.0654	28.1318	22.3324	26.247	160.111	170.216	152.594	127.517	142.407	100.334	75.9167	88.9212	104.426	191.785	154.674	184.447	102.736	97.1999	87.3524	NA	0.349986	-2.48804	-4.65116	3.38461	0.604501	-4.55721
yEpi33-1	Zm00001d044615	3	233458347	233460440	MRTO4	ribosomal protein L10-like protein [Zea mays]	36.2269	24.8489	27.1577	10.8277	8.8441	11.8648	61.5084	75.2055	65.8674	56.9356	82.1386	54.5543	34.0328	45.8336	48.1303	38.5609	55.1207	60.683	28.4849	25.1899	20.4062	-0.594164	2.04572	-0.363516	-1.18897	1.38925	1.67178	-3.9036
yEpi33-1	Zm00001d044620	3	233480561	233489829	Klhl1	DCD (Development and Cell Death) domain protein [Zea mays]	10.0022	11.7496	12.4002	0.678197	0.632629	0.653613	44.6618	47.2962	49.9125	2.80957	4.34774	4.05296	55.8545	86.6402	83.7639	25.6536	38.1783	39.655	6.07048	3.42827	2.84527	1.74458	-0.0789961	2.98633	0.616715	0.813141	1.23581	-1.44129
yEpi33-1	Zm00001d044621	3	233490453	233491514	fam175a	hypothetical protein ZEAMMB73_Zm00001d044621 [Zea mays]	11.3316	15.5057	15.0015	5.83621	6.98394	5.31695	13.9919	14.9801	14.6633	7.83094	12.4437	8.82316	9.78623	11.1702	10.2854	10.6087	10.1327	11.6492	6.38574	6.31187	4.04137	0.758419	-1.90483	0.358787	-0.569792	-0.278652	5.37232	-62.4801
yEpi33-1	Zm00001d044622	3	233498011	233502120	FBL3	F-box/LRR-repeat protein 3 [Zea mays]	4.14432	4.70659	3.70496	1.18445	5.7538	2.1949	10.2871	13.1586	10.0546	2.07563	10.0101	2.44801	11.4794	11.1242	9.20199	15.8266	15.9542	12.8933	7.05789	8.63326	12.6674	-2.56281	-0.557727	-1.16194	-0.906135	-11.8229	-46.9849	6.12152
yEpi33-2/yEpi40-2	Zm00001d008226	8	1889016	1893402	PHT4;1	PREDICTED: sialin isoform X1 [Zea mays]	2.00264	1.2836	1.83703	0.802631	1.81391	1.09764	7.63743	5.99216	5.9641	2.54051	4.19585	2.32559	33.0613	35.0098	23.4852	9.25792	8.87522	6.88844	33.7083	27.5621	51.8832	0.539353	-0.416567	-1.0341	-1.25966	-10.8289	-11.3829	6.91416
yEpi33-2/yEpi40-2	Zm00001d008228	8	1976472	1977821	PSRP5	50S ribosomal protein L40 [Zea mays]	12.5871	7.14265	9.48441	0.102331	0.745027	0.689286	24.532	20.0083	24.1265	2.22453	6.10802	1.54952	27.4634	24.9275	39.489	35.1959	34.6186	37.9695	70.4106	64.4236	50.8171	-0.13977	0.826542	0.82073	-1.34764	10.4842	10.6101	-5.54535
yEpi33-2/yEpi40-2	Zm00001d008230	8	2034108	2036318	CRD1	magnesium-protoporphyrin IX monomethyl ester [oxidative] cyclase, chloroplastic [Zea mays]	12.4639	9.31177	9.27895	0.199554	0	0.123959	47.9802	55.6108	58.1543	1.59308	0.792978	0.829334	227.747	249.502	248.85	141.73	152.908	121.95	218.129	258.509	266.631	-1.02083	0.242357	1.66667	-0.909121	0.940047	-4.53914	1.40227
yEpi33-2/yEpi40-2	Zm00001d008233	8	2062566	2071530	CSN2	COP9 sig0losome complex subunit 2 [Zea mays]	50.1616	30.7521	34.4102	9.80723	25.3313	14.6906	83.7238	69.4223	77.5704	42.4003	93.9535	45.705	51.5076	60.9868	44.2047	48.7556	51.5511	54.5899	18.8251	20.4889	17.9222	-0.623055	-0.370864	0.139479	-0.871793	-2.54082	3.17408	-2.08535
yEpi33-2/yEpi40-2	Zm00001d008236	8	2198415	2206591	OsI_01383	Glucosidase 2 subunit beta [Zea mays]	46.8098	71.0409	67.4874	10.5081	26.167	15.424	72.6997	81.7337	78.7493	38.6618	71.4382	41.4264	50.2273	71.8669	50.1825	62.4526	74.7675	66.0961	43.1853	39.4943	30.8715	0.706697	-0.372125	0.339286	-0.831306	-1.00414	-0.408278	-5.67238
yEpi33-2/yEpi40-2	Zm00001d008237	8	2224750	2226261	RING1	protein binding protein [Zea mays]	8.46642	6.64944	7.19318	0.958486	2.12912	1.48342	8.65903	13.4114	11.0567	3.57576	4.45394	4.74385	11.4151	32.3345	16.625	7.48247	9.42275	11.7344	94.2802	68.0685	222.209	-0.401495	-0.103161	0.00905259	1.66025	-0.501903	3.38283	10.7612
yEpi34-1	Zm00001d053568	4	234742154	234742759	-	PREDICTED: glycine-rich protein 1 [Oryza sativa Japonica Group]	0.681966	0.334209	0.566758	0	0.0973767	0.0312627	1.21115	0.300263	1.15388	0.0777663	0.0840847	0.0377773	101.932	27.2079	32.9737	21.234	1.71261	5.59427	14.8686	5.68485	13.1683	0.337422	-0.357902	0.874264	-13.6581	-0.845676	-0.602318	0.6297
yEpi34-1	Zm00001d053572	4	234902783	234907567	RNP1	R0-binding (RRM/RBD/RNP motifs) family protein [Zea mays]	45.4328	33.8526	49.6563	13.578	17.2877	17.3146	89.3031	93.4881	86.1332	61.2182	80.3799	51.9488	38.5623	38.18	38.943	38.5246	49.7737	53.454	18.6731	18.1158	20.4036	1.72945	1.01452	-2.51491	-1.9675	2.99232	1.65434	7.21074
yEpi34-1	Zm00001d053575	4	234970571	234980630	EDR1	Protein ki0se domain superfamily protein [Zea mays]	11.6676	7.23878	8.13564	2.07925	3.81433	2.71215	13.0439	6.06862	8.82502	10.0194	11.6196	9.56918	30.2312	17.0332	17.7574	16.5004	12.782	11.4399	27.696	13.8206	18.9705	-0.594991	-0.270475	-0.209662	-1.56271	-0.89026	-1.72185	-0.257687
yEpi34-2/yEpi35-2	Zm00001d012881	5	1566875	1569101	tolB	PREDICTED: protein TolB-like [Setaria italica]	1.55267	5.2622	2.77086	0.891313	1.87511	1.74058	0.260387	0.630302	0.709646	0.166649	0.971397	0.364994	120.209	39.4878	43.5218	4.56403	5.8921	2.5181	17.2262	31.4691	18.8868	-0.343212	0.726509	1.42898	-0.507064	-0.90005	-4.08105	-0.766814
yEpi34-2/yEpi35-2	Zm00001d012882	5	1573806	1578947	RBK1	Protein ki0se protein with adenine nucleotide alpha hydrolase-like domain [Zea mays]	8.58882	10.1533	8.34386	0.0850077	0.288479	0.439937	24.1018	22.0199	20.7915	0.613596	0.338649	0.680672	71.2209	27.8077	40.0905	21.8007	18.9862	21.5196	12.2827	8.82439	15.264	-1.31316	2.48874	-2.18011	1.48792	-0.434146	0.800243	2.72414
yEpi34-2/yEpi35-2	Zm00001d012884	5	1588003	1593592	coq6	FAD/0D(P)-binding oxidoreductase family protein [Zea mays]	13.4926	20.9139	19.77	3.65821	8.06626	4.70421	16.0846	24.4548	20.5472	10.3365	20.0696	12.3352	9.20547	27.0861	15.2932	5.91147	17.3588	15.8627	13.0047	17.0668	15.2356	0.691716	-0.52541	0.0663065	-0.5893	-0.319068	0.738624	0.0984068
yEpi34-2/yEpi35-2	Zm00001d012885	5	1594063	1594988	SBT3.3	Pi starvation-induced protein precursor [Zea mays]	0	0	0	0	0	0	0	0	0	0	0	0	0	0	0	0	0	0	422.936	390.89	307.781	NA	NA	NA	NA	NA	NA	-6.18688
yEpi34-2/yEpi35-2	Zm00001d012886	5	1605087	1607673	RPS21	PREDICTED: 40S ribosomal protein S21-like isoform X1 [Zea mays]	111.206	63.7718	99.0189	41.9251	38.0153	40.3249	164.966	191.114	186.363	201.178	259.715	156.085	37.9347	74.2201	90.8958	83.4025	107.073	178.907	40.7903	45.9305	26.9034	0.486132	0.181428	0.636566	-2.54069	1.91914	7.06949	-6.40331
yEpi34-2/yEpi35-2	Zm00001d012888	5	1612077	1615249	-	hypothetical protein ZEAMMB73_Zm00001d012888 [Zea mays]	25.9351	29.3183	29.9535	4.82947	4.88469	6.14931	38.9851	38.0629	43.7533	15.1342	16.5783	14.7489	24.0756	28.4941	16.4151	35.3511	33.2745	43.1354	12.1273	22.4158	13.5494	1.3755	46.7988	11.3409	-1.53367	-4.46745	8.49685	-0.723552
yEpi34-2/yEpi35-2	Zm00001d012890	5	1618038	1622184	mrpl41-a	PREDICTED: 39S ribosomal protein L41-A, mitochondrial-like [Setaria italica]	38.9574	40.6268	36.1921	10.8568	18.1642	11.8156	53.8634	66.5922	59.2227	44.6538	91.9721	39.3829	13.9816	33.3633	30.7248	46.2698	61.4902	69.8973	23.5823	48.3694	13.3337	-4.31299	-0.737588	-0.157927	-1.22278	0.727728	2.10472	-1.82693
yEpi34-2/yEpi35-2	Zm00001d012892	5	1643067	1653399	ACBP4	Acyl-CoA-binding domain-containing protein 4 [Zea mays]	25.6066	21.5176	24.7874	5.69772	9.87286	6.48231	32.6249	38.4823	34.6972	27.046	34.419	22.7162	38.4566	48.9395	41.8573	67.4875	68.2665	59.5776	38.8293	32.5007	31.8896	0.599318	-0.62416	-0.292411	-2.17449	-0.351189	-21.306	-1.19313
yEpi34-2/yEpi35-2	Zm00001d012895	5	1713093	1718062	-	DUF4378 domain protein [Zea mays]	5.92782	6.93324	6.20549	1.60492	2.37247	2.10541	17.5366	15.0134	14.8615	7.63082	8.72608	9.93786	3.26478	5.31719	5.40515	10.8843	11.0837	11.3753	12.0209	8.70597	16.8624	-0.447657	0.304114	-1.12041	3.21278	1.08571	3.9252	3.92099
yEpi34-2/yEpi35-2	Zm00001d012896	5	1719750	1724041	-	PREDICTED: uncharacterized protein LOC100273886 isoform X1 [Zea mays]	36.5796	33.8327	41.7653	8.76806	7.70682	7.73764	54.3207	53.5401	44.912	17.839	10.4233	17.9799	27.3473	24.8359	21.0723	39.2408	37.7031	38.6462	16.6444	15.7137	12.2002	4.77567	-0.941919	-23.1042	1.03802	-3.99722	0.226634	-8.55051
yEpi34-2/yEpi35-2	Zm00001d012906	5	1836103	1837130	CNR3	cell number regulator 3 [Zea mays]	0	0	0	0	0	0	0	0	0	0	0	0	0	0	0	0	0	0	225.943	408.811	586.662	NA	NA	NA	NA	NA	NA	2.94514
yEpi34-2/yEpi35-2/yEpi63-2	Zm00001d012908	5	1876137	1876529	EPHX2	soluble epoxide hydrolase [Zea mays]	0	0	0.160223	0	0	0	0	0	0	0	0.467957	0	0	0	0	0	0	0	0	0.123751	0	NA	NA	NA	-1	NA	NA	-1
yEpi34-2/yEpi35-2/yEpi63-2	Zm00001d012909	5	1879412	1882842	EPHX2	uncharacterized LOC100191966 isoform 2 [Zea mays]	0.310538	0	0.334965	0	0	0	0	0	0	0	0	0	0	0	0	0	0	0	0	0	0	1.15732	NA	NA	NA	NA	NA	NA
yEpi34-2/yEpi35-2/yEpi63-2	Zm00001d012911	5	1884345	1891050	-	Huntingtin interacting protein K [Zea mays]	110.374	79.2822	93.487	26.1351	35.9637	37.8344	125.51	166.43	162.16	173.221	161.08	142.765	90.6939	137.173	127.426	146.196	125.217	181.774	46.8282	54.282	45.5154	-0.0862576	1.38067	0.79131	-4.01716	0.580581	4.39168	-1.35225
yEpi34-2/yEpi35-2/yEpi63-2	Zm00001d012913	5	1891852	1900865	D0jc14	Chaperone D0J-domain superfamily protein [Zea mays]	46.0003	56.5003	52.1721	7.65992	10.4649	8.27853	48.3756	48.178	48.7243	14.2894	17.1657	13.7586	55.6505	52.8402	41.7402	59.0937	60.2151	55.5233	49.8631	39.3276	53.1712	0.175579	-0.558923	4.52912	-1.36912	-8.89941	-7.36812	1.62798
yEpi34-2/yEpi35-2/yEpi63-2	Zm00001d012916	5	1908305	1915026	SPL6	Squamosa promoter-binding-like protein 1 [Zea mays]	12.7578	12.7759	10.0119	1.65954	3.83784	2.10729	21.5819	19.5061	19.2852	8.47772	17.4332	11.6005	16.45	15.603	12.9616	21.467	19.4138	18.7905	5.02543	4.4919	4.92501	-304.092	-0.588898	-1.21284	-0.302603	-7.23711	-1.60707	0.623559
yEpi35-1	Zm00001d053611	4	236401759	236413086	PHF3	death-inducer obliterator 1-like [Zea mays]	11.3008	9.50987	11.6187	10.8392	5.89051	9.95953	18.2327	15.7653	15.7872	19.1807	8.32081	15.2889	13.2181	13.1614	10.9553	13.881	13.3259	13.745	7.33361	5.93974	5.28169	1.35512	0.644481	-0.982255	0.283278	-78.8609	0.51011	-1.94421
yEpi35-1	Zm00001d053613	4	236483017	236493112	RBMY1B	R0-binding (RRM/RBD/RNP motifs) family protein [Zea mays]	42.0927	48.7554	40.1307	3.42706	6.91561	5.30742	76.1685	119.488	103.628	15.6954	27.0287	16.0429	55.9032	85.1731	59.4943	48.2066	83.1488	81.8084	33.4126	42.8031	36.4631	-1.58893	0.0780183	0.267755	-0.938671	-0.754624	0.923279	-0.350289
yEpi35-1	Zm00001d053616	4	236545424	236550814	RPT6A	PREDICTED: 26S protease regulatory subunit 8 homolog A [Setaria italica]	94.6494	77.7193	74.0581	19.1399	19.2596	22.2875	185.278	165.413	180.849	76.2941	100.64	65.4087	102.817	141.61	124.184	121.152	149.266	166.796	112.106	83.8812	95.2104	-1.43251	51.6004	0.554079	-1.89421	0.101593	2.24706	-0.197231
yEpi36-2	Zm00001d013869	5	23456902	23457294	SAUR32	SAUR56-auxin-responsive SAUR family member [Zea mays]	3.79038	10.9374	11.5147	1.02097	1.17266	0.783066	0.604811	0.346663	0.686035	2.46269	1.15188	0.857502	0.376503	1.19249	0.595027	1.53272	1.45199	0.796412	14.4848	6.62223	11.3093	1.16155	-4.13674	1.62928	-1.44914	-0.464395	-17.2417	0.192253
yEpi36-2	Zm00001d013873	5	23536538	23540265	ACT2	actin-2 [Zea mays]	14.3269	48.0878	22.8501	11.3178	20.3383	21.4644	38.3195	83.5805	60.2981	32.7351	65.2092	31.4178	38.3393	67.0996	76.0354	44.4359	101.629	65.3399	6.54548	9.51434	8.5486	-0.495083	1.24968	-0.0288053	-1.08113	1.62139	-0.269003	0.349425
yEpi36-2	Zm00001d013879	5	23707174	23707530	-	protein RESPONSE TO LOW SULFUR 3-like [Aegilops tauschii subsp. tauschii] [Aegilops tauschii]	0	0.0961827	0.136839	0.512581	0.515251	0.27137	0.542322	0.40872	0.981147	0.106117	0.233077	0.044351	0.280764	0.459077	0	0.720902	2.03504	1.17784	58.6383	24.7981	46.628	1.84541	-181.728	7.56912	-1.973	-4.1491	-0.304582	0.290179
yEpi39-1/yEpi40-1	Zm00001d022227	7	173165811	173167796	MYB306	Transcription factor MYB30 [Dichanthelium oligosanthes]	3.04782	3.3977	3.43361	0.169602	0.0732847	0.0657707	2.48966	1.94332	2.6998	0.446602	0.175381	0.260805	51.3454	31.5081	34.8518	3.91888	2.61617	5.02052	2.98574	3.4575	2.4711	1.20529	-1.15603	1.7693	-0.370077	-0.662887	2.6913	-3.1818
yEpi39-1/yEpi40-1	Zm00001d022230	7	173266204	173271408	CSLA7	PREDICTED: probable man0n synthase 7 [Zea mays]	14.06	13.5437	14.4646	11.3953	14.7558	14.8854	22.136	80.6712	49.5919	18.3405	23.3659	21.1128	13.1191	6.75719	10.0761	43.0059	30.5182	37.7046	22.6602	15.214	19.6435	2.56723	1.07717	-0.0619008	0.103335	0.0433841	0.150956	0.189732
yEpi39-1/yEpi40-1	Zm00001d022231	7	173271292	173287007	CG7427	Defective in cullin neddylation protein [Zea mays]	15.4681	12.7169	14.1616	6.38664	10.3501	9.04386	24.6277	24.3732	28.3096	20.6824	27.237	19.2157	31.5266	37.1076	32.6955	22.7293	25.7028	24.8844	13.0083	12.3779	9.04903	0.0502351	0.340869	29.9372	-1.44755	-0.581129	0.449515	-11.5617
yEpi39-1/yEpi40-1	Zm00001d022236	7	173376167	173378936	exosc6	PREDICTED: exosome complex component MTR3 [Setaria italica]	49.2531	38.3178	35.1452	8.42297	6.20186	8.29598	45.9884	55.8222	49.812	49.8924	49.3594	36.8431	24.2656	24.9793	20.3691	39.4214	36.9525	43.9064	6.99583	11.0131	6.53229	-1.58027	0.885649	-0.22236	-47.9647	-11.9197	4.63311	-1.23077
yEpi39-1/yEpi40-1	Zm00001d022237	7	173379234	173381283	CP29B	R0 binding protein 1 [Zea mays]	7.32561	5.65488	8.53128	3.30154	4.95549	5.19184	26.4405	41.4167	31.322	43.3848	50.9341	37.117	64.5003	99.2715	110.681	45.9186	71.584	58.1675	332.606	382.523	417.154	2.44328	1.2858	-0.348095	-2.66051	1.65625	-0.0454936	2.38752
yEpi39-1/yEpi40-1	Zm00001d022238	7	173392122	173395313	At1g26690	transmembrane emp24 domain-containing protein 10 precursor [Zea mays]	29.4587	26.8155	23.1607	6.42462	11.9208	10.0831	23.5594	31.2295	27.1535	36.9515	53.1426	30.1212	30.4417	41.4383	34.1773	40.657	47.5365	33.3456	36.6762	50.8243	35.6231	-3.76536	0.331288	-0.0628204	-1.84371	-0.320604	-3.12555	-1.14887
yEpi39-1/yEpi40-1	Zm00001d022239	7	173396699	173401006	splA	PREDICTED: serine/threonine-protein ki0se STY8 [Setaria italica]	15.425	16.2506	16.3317	2.7862	6.10321	6.67898	29.0213	47.5375	37.8492	3.49785	7.227	3.00584	55.1613	45.5421	65.3456	57.488	65.5721	70.2067	47.505	48.4094	38.1329	1.19648	1.34716	-0.0464683	-1.26387	3.11747	2.1466	-21.7257
yEpi39-1/yEpi40-1	Zm00001d022240	7	173410425	173421144	PUS7	Pseudouridine synthase family protein [Zea mays]	18.7259	16.184	18.6244	2.80066	2.94333	4.36015	44.1787	40.2478	37.7704	12.8728	14.7991	9.16646	10.6602	20.9123	13.7057	21.2356	23.6431	26.5808	8.27863	6.42308	5.76598	0.920169	20.8616	-2.26053	-4.84829	-0.405876	3.44054	-1.70826
yEpi39-2	Zm00001d008189	8	750465	754201	RAP	PREDICTED: retrotransposon protein SINE subclass isoform X2 [Zea mays]	3.77529	27.0155	14.9211	0.314338	0.26646	0.22259	132.24	112.579	159.449	0.710162	0.624842	0.379273	89.5309	180.297	140.989	236.756	210.548	218.08	171.057	128.734	206.938	-0.0408203	-2.83256	3.76775	-6.75642	0.133862	-0.425222	2.69558
yEpi39-2	Zm00001d008200	8	985128	985854	LTI6B	hydrophobic protein LTI6B [Zea mays]	9.87551	0.642797	4.65773	47.4509	0	45.7742	0.825135	0	0	3.86967	0	6.92239	229.74	52.4085	56.6973	36.0421	133.923	21.3763	94.0792	47.7028	81.6754	-0.13028	0.92933	-1	2.57777	-0.951629	-1.29967	0.465081
yEpi41-1	Zm00001d042286	3	158988662	158990021	-	P0482D04.7 [Oryza sativa Japonica Group]	0.513535	3.89399	2.32835	0.184549	0	0.216459	0	1.41642	1.74335	1.20065	0.561753	0	0.310689	0	0.88614	0	0.901083	1.09142	524.228	467.79	1286.37	0.0737073	1.34582	1.46163	-2.7585	4.70435	1.42247	28.0079
yEpi41-1	Zm00001d042287	3	159074669	159084170	CDC5	CDC5 protein [Zea mays]	50.3028	68.6819	66.8015	8.38756	13.4704	10.5922	79.324	75.6933	75.1332	34.3226	51.2932	35.9709	40.5982	46.3008	36.3367	48.8468	55.8458	52.2597	27.9123	20.4428	18.1509	0.795367	-0.132496	-1.30852	-0.805752	-2.49456	-0.0247456	-1.61368
yEpi41-1	Zm00001d042288	3	159141395	159142770	0M-1	0C domain-containing protein 68 [Zea mays]	28.1399	37.0033	35.349	95.7782	130.764	104.811	37.482	32.0656	37.3678	97.8651	95.306	112.736	3.70997	5.99117	5.21496	24.4654	27.6705	31.1081	50.7721	67.6654	57.1237	0.626716	-0.483636	0.957837	12.6213	0.319477	3.14506	-0.248037
yEpi41-1	Zm00001d042289	3	159151282	159153701	-	rieske domain containing protein [Zea mays]	0.921591	1.99784	1.60505	0.462261	1.12113	1.25345	3.88566	6.68794	4.98886	0.400641	0.136358	0.577847	13.5371	20.894	19.9823	6.88027	11.1637	8.22763	65.6859	122.089	126.844	0.270081	1.40167	-0.212644	2.34103	0.752136	-0.370895	1.1686
yEpi41-1	Zm00001d042290	3	159213195	159216491	PAT07	PREDICTED: probable protein S-acyltransferase 7 isoform X2 [Zea mays]	19.618	9.93798	12.1019	0.646743	0.600716	0.850253	56.8471	58.4508	54.1112	4.40144	5.99224	3.00262	1.41438	6.45472	5.70974	21.8552	28.4792	36.5434	2.68054	3.81084	0.665152	-0.552907	9.8432	-4.41194	-2.75863	0.704393	3.43484	-4.56611
yEpi41-2	Zm00001d020283	7	104115314	104131534	Cd2bp2	PREDICTED: CD2 antigen cytoplasmic tail-binding protein 2 homolog isoform X1 [Setaria italica]	14.1535	17.8423	19.028	3.19044	4.65813	4.68498	25.083	29.2643	28.6252	9.0775	11.4153	8.60626	12.9016	17.5702	13.4388	18.4943	20.2661	19.2597	6.22833	6.64677	6.71195	1.64289	1.03659	0.694284	-1.40316	-0.769878	-0.136027	1.31152
yEpi4-2	Zm00001d051249	4	150498265	150503211	ERG3	PREDICTED: elicitor-responsive protein 3-like isoform X1 [Setaria italica]	15.5496	11.2396	15.7552	8.64087	18.3867	14.0768	6.09378	12.5445	9.30998	3.16391	8.7488	4.73757	6.4698	14.6816	7.90154	6.2531	12.8723	9.90202	220.128	227.078	205.266	1.09538	0.115531	NA	-0.436457	-0.651298	0.102532	-5.27679
yEpi4-2	Zm00001d051250	4	150569015	150572646	Os02g0639900	chloroplast thioredoxin M-type 2 precursor [Zea mays]	15.3984	23.9894	17.9303	2.87568	3.83745	1.40941	19.1813	34.0882	30.7567	9.26964	13.5128	8.03047	19.51	46.9316	43.3631	35.7711	53.9131	45.3108	22.0632	36.6555	17.5559	-0.410562	-4.0491	0.553022	-1.58408	0.73973	0.0516783	-1.61777
yEpi42-2/yEpi45-2	Zm00001d020297	7	104760610	104770103	Stk16	serine/threonine protein ki0se 3 [Zea mays]	16.4391	18.7272	16.5075	3.80031	3.99636	3.80405	49.2413	52.4618	53.2488	20.3395	36.7069	19.8737	73.3075	87.9185	68.7495	78.8699	75.9786	65.3068	35.781	33.3796	36.4197	-0.940235	-0.961813	1.48877	-1.05693	-1.62393	-8.38175	1.53201
yEpi42-2/yEpi45-2	Zm00001d020303	7	104926515	104927627	At3g57590	uncharacterized LOC100383281 [Zea mays]	12.7762	4.3254	7.366	2.53778	1.98852	3.32535	14.785	16.6151	14.7561	3.95612	3.75073	5.16255	18.6353	52.0742	31.581	16.9586	18.0962	16.0868	14.3756	10.006	11.416	-0.2804	3.86777	-1.03155	12.7481	-0.225707	-2.53267	-0.354645
yEpi43-1	Zm00001d042347	3	162369545	162373901	Os07g0631100	unknown [Zea mays]	0	0	0	0.703561	0.925542	0.864127	0	0	0	0.358935	0.951682	0	0	0	0	0	0	0	0	0	0	NA	0.446667	NA	-2.21109	NA	NA	NA
yEpi43-1	Zm00001d042349	3	162503582	162506018	-	hypothetical protein ZEAMMB73_Zm00001d042349 [Zea mays]	0.985386	0	0.209559	0.833215	0.13932	0.729871	0.658958	0.614638	0.34451	3.16603	0.833251	2.22494	35.7013	15.2396	12.6854	6.94963	4.61995	3.37704	29.4174	18.188	22.6897	-0.574666	0.702133	-13.1899	0.193161	-1.24966	-2.06702	-0.198231
yEpi43-1	Zm00001d042350	3	162539747	162542986	Rnf4	RING/U-box superfamily protein [Zea mays]	51.3903	42.1223	48.0065	23.111	12.2759	21.5515	50.4586	51.745	52.3521	39.5053	31.2803	34.9408	66.3841	55.3493	43.5442	53.5002	45.2883	46.4725	36.212	32.0273	26.9411	0.269778	0.71215	1.94374	-0.109905	-3.1396	-0.711595	-3.43084
yEpi43-2	Zm00001d044747	9	1104146	1104848	-	B12D protein [Zea mays]	263.05	208.303	139.709	312.372	369.478	340.447	143.147	84.877	121.399	1321.29	1286.01	910.686	202.553	133.522	176.904	214.249	136.853	148.78	66.3333	60.6729	54.2075	-3.50588	-0.0167547	0.253535	-22.2749	0.256896	-0.691808	-3.28448
yEpi43-2	Zm00001d044748	9	1120172	1124593	Os06g0246500	Pyruvate dehydroge0se E1 component subunit alpha-1 mitochondrial [Zea mays]	143.256	204.79	219.072	1.82851	2.59164	3.10061	5.19373	0	4.31114	5.37746	3.92867	6.35153	11.1177	15.8686	5.69866	5.83659	0.699119	3.21474	1.39692	0.514576	0.948322	1.46419	2.3339	0.66013	2.34467	-3.28128	-0.0206776	-0.016831
yEpi43-2	Zm00001d044752	9	1245653	1246790	GATL9	PREDICTED: probable galacturonosyltransferase-like 9 [Setaria italica]	6.41577	12.2401	10.1525	2.30169	3.04584	2.98586	13.3757	15.1404	14.8031	5.97646	11.7149	5.77989	2.38956	5.22651	8.31949	9.86228	19.3167	21.7297	2.0531	2.91288	2.79849	0.28314	0.838792	0.617698	-1.06851	3.18051	1.51045	0.733921
yEpi43-2	Zm00001d044753	9	1257308	1268407	Tceb1	Elongin [Zea mays]	26.5402	31.6018	29.6798	3.61752	3.22166	3.93456	34.0497	39.0478	32.6821	7.83868	14.5303	8.61229	30.308	54.2117	42.7767	50.912	59.039	41.2576	44.7692	63.5315	46.444	0.240556	2.60178	-1.54723	-0.768782	0.0432442	-3.37591	-0.821468
yEpi43-2	Zm00001d044754	9	1341074	1353747	PFP-BETA	Pyrophosphate--fructose 6-phosphate 1-phosphotransferase subunit beta 2 [Zea mays]	0	0	0	0	0	0	0	0	0	0	0	0	0	0	0	0	0	0	0	0	0	NA	NA	NA	NA	NA	NA	NA
yEpi43-2	Zm00001d044757	9	1442782	1460701	DRP2A	Dy0min-2A [Zea mays]	62.8394	65.2853	67.8115	20.805	34.4333	28.1822	98.1069	120.376	107.194	47.873	88.1104	65.2889	73.1611	108.861	76.0635	82.1501	102.405	95.5388	39.1956	48.1582	35.1292	3.06559	0.0826277	-0.183879	-0.134344	-0.8374	0.322054	-1.90742
yEpi44-1/yEpi45-1	Zm00001d042441	3	167523894	167537970	MRS2-F	PREDICTED: magnesium transporter MRS2-F isoform X1 [Zea mays]	97.813	123.36	110.61	9.83294	13.2746	11.4562	80.889	88.6999	84.763	22.613	29.0805	24.1131	150.486	138.917	96.9178	143.91	114.698	93.9932	56.5023	44.0238	69.5703	NA	-0.0566687	-0.00805699	-0.536116	-8.26051	-2.41758	3.09448
yEpi44-1/yEpi45-1	Zm00001d042442	3	167605139	167612389	ICMT	PREDICTED: LOC100284671 isoform X1 [Zea mays]	5.50066	5.08419	5.66618	1.50324	2.1675	1.77283	17.6766	23.7406	20.4154	5.94204	11.0481	7.22536	15.9014	18.4448	18.1318	16.3582	20.2158	21.3138	9.54087	10.8039	15.292	1.79489	-0.188309	-0.0966959	-0.49734	0.753842	1.56929	8.10655
yEpi44-1/yEpi45-1	Zm00001d042443	3	167612707	167616683	BT2	BTB/POZ and TAZ domain-containing protein 1 [Dichanthelium oligosanthes]	8.11235	10.8665	10.0211	0	0	0.33335	15.2157	34.9641	18.8729	0.782899	0.516864	0	0.563794	0.620721	0	7.81036	9.23872	10.7589	20.637	30.8843	43.1493	0.386086	NA	-0.629625	-4.88568	-20.8075	3.1285	3.39381
yEpi44-2	Zm00001d020267	7	103377384	103378274	ERF060	ethylene-responsive transcription factor RAP2-13-like [Zea mays]	84.0358	132.388	115.178	14.2818	17.2003	13.5883	249.201	218.542	233.303	54.0846	37.0141	37.4863	90.0136	62.4965	83.1612	147.015	164.844	180.953	57.1478	45.0906	47.4028	0.288154	-1.47524	-0.0371193	-0.944669	0.501953	2.807	-0.616458
yEpi44-2	Zm00001d020268	7	103433362	103435296	-	hypothetical protein ZEAMMB73_Zm00001d020268 [Zea mays]	151.429	25.9723	114.684	0.32258	0.0673923	0.0929603	0	0.930224	0.280365	0.843315	0.152571	1.65131	0	0	0	0	0.127069	0.122625	0.479197	0.086295	1.21061	0.414224	-0.799614	-0.397209	3.3395	NA	0.930059	4.72313
yEpi46-1	Zm00001d051910	4	174417077	174421569	gyp1	TBC1 domain family member 22A [Zea mays]	35.9061	32.2784	35.378	9.00208	12.6773	10.4414	61.2751	70.1752	60.8143	39.3318	47.4149	33.4443	45.6242	52.1022	46.1729	55.7693	66.035	59.1459	35.6611	34.1699	29.9985	0.708854	-0.21674	-1.10355	-2.45673	-0.830603	-0.342167	-6.59446
yEpi46-1	Zm00001d051911	4	174427408	174429846	IAA10	Auxin-responsive protein IAA13 [Zea mays]	31.6899	19.5387	31.5842	0.669511	0.874675	1.08275	48.303	49.4362	48.9886	1.9816	1.78469	1.58697	36.957	27.5068	29.3873	21.7107	27.7323	28.3076	31.6205	26.4652	22.4623	0.982598	3.02839	0.210036	-3.00831	-0.602009	1.19106	-2.55293
yEpi46-1	Zm00001d051912	4	174430425	174434646	KOB1	voltage-gated potassium channel beta subunit [Zea mays]	31.3621	27.0364	22.8516	3.16676	1.12865	3.71152	70.2936	71.88	70.0512	12.2293	8.99463	6.18759	250.233	177.756	254.921	31.1748	33.4789	42.447	19.9325	44.4988	27.6989	-2.93484	1.53457	-1.3056	-2.73559	1.12938	8.78423	-0.367716
yEpi46-1	Zm00001d051913	4	174496316	174502253	ARPC1B	Actin protein 2/3 complex subunit 1B [Zea mays]	27.1869	28.3286	29.3744	33.8349	45.7965	52.9281	38.8809	41.2837	38.2262	61.3535	70.8381	57.9732	23.0392	16.5267	14.0078	38.6575	33.9518	32.7112	21.7184	22.7095	16.5047	2.83203	2.19242	-1.54493	-1.71281	-1.77354	-1.52728	-11.5211
yEpi46-1	Zm00001d051915	4	174610009	174614912	At1g79600	PREDICTED: ABC(yeast) homolog1 isoform X1 [Zea mays]	6.20272	7.5367	6.96725	0.26156	0.963583	0.487877	8.12885	7.79691	8.10181	1.63312	4.48748	1.82433	5.95651	7.39883	6.00707	10.1126	10.1113	7.88124	39.818	61.3185	104.989	0.146239	-0.355244	0.837088	-0.866024	-0.929883	-3349.44	5.06229
yEpi46-1	Zm00001d051916	4	174610973	174619416	-	unknown [Zea mays]	18.3918	26.5282	24.3575	4.13284	5.49186	5.76581	26.1119	31.4041	26.6161	9.27571	11.9742	9.74194	20.2747	21.3552	17.3842	23.1972	25.5343	22.1319	9.45214	12.2506	11.6552	0.466426	1.40315	-0.809432	-0.654442	-6.3503	-1.91158	0.574465
yEpi46-2	Zm00001d019664	7	48965568	48977532	-	PREDICTED: uncharacterized protein LOC100276564 isoform X1 [Zea mays]	44.9854	75.2292	55.9689	6.82892	12.1678	8.27833	42.4448	43.2222	41.6083	18.5616	32.5736	18.8465	55.0044	71.2579	48.4601	44.7077	53.155	39.7599	14.5207	14.5478	16.2404	-0.273672	-0.457032	-3.1519	-0.95933	-1.80529	-2.17143	126.109
yEpi47-1	Zm00001d020019	7	86094098	86099698	APL	PREDICTED: myb family transcription factor-related protein isoform X1 [Zea mays]	27.647	17.4452	26.8305	1.3366	2.68037	1.82292	66.1522	53.0478	66.2614	11.176	11.2844	10.9704	27.3879	30.5167	32.0769	45.2603	46.7267	50.4502	12.6194	10.5996	10.3624	0.839941	-0.276186	1.01666	-4.79283	1.99735	6.07875	-1.23492
yEpi47-1	Zm00001d020020	7	86219721	86224081	PHL1	Myb family transcription factor PHL7 [Zea mays]	25.062	36.5384	29.26	6.14312	16.1943	6.74412	78.3615	71.856	71.9296	21.9325	42.0441	24.688	40.0401	46.5644	32.7115	66.6328	60.8192	63.1121	35.7815	32.6898	37.0876	-0.268407	-0.88041	-0.97738	-0.725976	-3.24658	-0.211196	1.84492
yEpi47-2/yEpi48-2	Zm00001d018624	7	1247292	1253741	ATK5	kinesin-related protein11 [Zea mays]	11.1421	8.55665	8.86247	0	0.0920703	0	92.2476	64.8363	76.555	2.81464	3.28563	1.2636	0.680492	1.31504	0.888289	7.74476	12.0931	24.3713	0	0.0130373	0	-0.763422	-1	-0.144971	-7.5862	-0.345053	6.6473	-1
yEpi47-2/yEpi48-2	Zm00001d018626	7	1327797	1335562	LRRC48	Outer arm dynein light chain 1 protein [Zea mays]	26.9096	23.8705	29.9014	6.66938	6.15509	8.63121	31.6027	31.998	30.1316	15.0279	20.0997	16.1792	71.991	76.9346	72.2591	44.4414	51.0101	44.6019	36.5665	29.0189	30.5348	2.96885	8.62928	-8.44402	-0.545994	-0.891509	-0.951126	-0.598316
yEpi47-2/yEpi48-2	Zm00001d018629	7	1372027	1372659	DIR1	PREDICTED: dirigent-like protein pDIR3 isoform X1 [Zea mays]	1.13058	0.721189	1.34875	0.0124213	0.0482803	0.00796867	2.45013	0.494281	1.66165	0.233012	0.136377	0.0621833	9.76775	3.16831	10.4171	33.1741	23.5129	10.2606	13.1169	22.9773	11.4254	2.0658	-1.24834	0.193723	-2.53555	1.1968	-3.74342	-1.34309
yEpi47-2/yEpi48-2	Zm00001d018631	7	1374181	1374933	DIR1	disease resistance response protein [Saccharum hybrid cultivar R570]	30.2087	86.7971	66.5512	0.116737	0.594959	0.20025	37.1209	48.9982	48.6858	1.80962	0.645238	1.32792	85.8816	61.9237	147.942	382.309	320.043	206.623	41.2368	39.4499	14.8553	0.28445	-0.650736	0.947395	0.172606	6.18081	-4.64303	-28.529
yEpi47-2/yEpi48-2	Zm00001d018632	7	1388811	1390530	PDX11	Pyridoxal 5'-phosphate synthase-like subunit PDX1.2 [Zea mays]	141.906	276.455	230.142	32.9376	20.8787	23.556	79.5022	96.1681	93.6446	81.3743	134.171	40.5557	51.8702	85.827	81.4792	81.01	75.7858	95.7827	59.0291	92.726	48.7288	0.311588	-0.555952	0.697165	-2.54627	0.743922	6.65555	-1.61135
yEpi47-2/yEpi48-2	Zm00001d018633	7	1389242	1390195	PDX11	Pyridoxal 5'-phosphate synthase-like subunit PDX1.2 [Zea mays]	0	0	0	0	0	0	0	0	0	0	0	0	0	0	0	0	0	0	0	0	0	NA	NA	NA	NA	NA	NA	NA
yEpi47-2/yEpi48-2	Zm00001d018634	7	1391301	1395097	RRP15	PREDICTED: RRP15-like protein [Setaria italica]	26.0287	30.8722	35.3782	15.2631	10.8197	14.4827	53.9097	34.8619	48.4136	35.5124	19.1246	23.7571	22.6178	15.0192	20.1329	26.2773	15.9971	29.7915	9.79444	4.77611	5.9365	2.86066	0.648736	0.422922	-0.434645	0.34595	1.6837	-0.53754
yEpi47-2/yEpi48-2	Zm00001d018636	7	1401157	1403921	-	PREDICTED: serine/arginine repetitive matrix protein 2 [Setaria italica]	22.0358	13.7152	16.6063	2.01934	3.36977	2.88341	20.3083	20.3603	20.9942	6.92212	11.0247	7.41046	22.0759	15.3255	12.0546	20.0828	18.41	16.5037	15.688	14.2431	11.9987	-0.305075	0.279687	25.3912	-0.761935	-1.96909	-3.27932	-4.10647
yEpi47-2/yEpi48-2	Zm00001d018637	7	1406045	1411041	-	Transducin/WD40 repeat-like superfamily protein [Zea mays]	18.1874	11.7465	13.2948	2.31663	2.80139	2.71589	28.7225	16.9562	19.1976	9.8877	6.1845	8.54386	10.2694	10.2146	8.84399	15.9065	12.1333	17.1562	8.23453	4.93458	4.76977	-0.51922	0.647238	-0.619016	0.274229	-51.0823	1.6624	-1.09989
yEpi47-2/yEpi48-2	Zm00001d018638	7	1410785	1413063	ALF5	PREDICTED: protein DETOXIFICATION 18-like [Setaria italica]	14.3128	13.3862	13.0995	14.7482	14.5179	19.673	20.0056	22.338	22.1956	36.4541	33.5598	26.4908	40.4264	27.9791	39.724	30.2178	42.5141	33.6013	581.933	796.426	924.581	-1.61881	43.7742	0.877848	-5.88476	0.887145	-0.449669	2.19495
yEpi47-2/yEpi48-2	Zm00001d018639	7	1414649	1420776	GGAT1	Pentatricopeptide repeat-containing protein ELI1 chloroplastic [Zea mays]	0	0	0	0	0	0	0	0	0	0	0	0	0	0	0	0	0	0	0	0	0	NA	NA	NA	NA	NA	NA	NA
yEpi47-2/yEpi48-2	Zm00001d018642	7	1465054	1470400	wdr82-b	Transducin/WD40 repeat-like superfamily protein [Zea mays]	37.2043	84.026	49.0435	9.26274	5.38337	7.60134	68.1169	110.787	69.6087	45.9731	22.5612	26.0249	27.2472	64.8089	37.2342	40.6467	77.2453	55.6451	19.117	44.7301	25.223	-0.494286	0.143468	-0.930077	-0.704107	-0.468235	-0.180386	-0.523211
yEpi48-1	Zm00001d020038	7	87795585	87811711	ASHH3	Histone-lysine N-methyltransferase, H3 lysine-36 and H4 lysine-20specific [Zea mays]	19.7719	16.2468	16.7202	2.25077	3.49795	2.59064	42.1208	34.3697	37.1965	10.8363	16.0793	10.6835	20.4105	17.7382	19.6191	22.1327	21.5589	24.1529	5.9135	3.69915	5.56713	-0.731378	-0.454964	-0.27061	-1.05827	0.407725	8.04083	0.68716
yEpi49-1	Zm00001d048461	9	156752400	156768303	PAT1	PREDICTED: blue fluorescent1 isoform X1 [Zea mays]	144.793	66.1371	93.895	12.2466	6.37683	9.9386	131.8	82.0335	102.851	87.653	47.2726	55.2259	50.8121	28.6442	68.3924	185.234	45.2831	118.806	57.0081	23.6665	16.5348	-0.294196	0.213604	-0.163387	-0.606081	2.5861	0.0506927	-1.42779
yEpi49-1	Zm00001d048463	9	156771663	156777418	CBSDUF7	Hemolysin [Zea mays]	13.1026	6.25979	11.5135	7.50977	7.10403	8.59056	21.768	18.2715	18.7038	8.61063	12.6769	5.0426	19.4798	14.3157	12.1839	17.2442	13.9361	13.8433	18.8887	10.8107	11.9808	0.53553	6.32757	-0.752715	-2.75495	-1.82562	-1.05612	-0.710292
yEpi49-1	Zm00001d048466	9	156825990	156831559	dda1	uncharacterized LOC103631233 [Zea mays]	26.6846	13.8405	30.1347	9.83858	1.24043	5.12701	27.0616	9.175	22.1743	18.4908	6.05024	10.8896	36.1666	23.4867	26.1088	46.7989	15.9666	25.0425	17.9486	12.7903	16.3994	1.53721	-0.0959499	0.453523	-0.222013	-0.586424	-0.411277	0.399345
yEpi49-1	Zm00001d048467	9	156831903	156836049	At1g01540	PREDICTED: probable serine/threonine-protein ki0se At1g01540 [Setaria italica]	8.81206	7.73003	8.72881	1.34811	3.3786	1.37372	44.383	21.535	34.6698	7.12533	13.7219	7.67213	32.8996	8.31065	20.1152	34.657	10.867	29.3578	27.8618	5.97065	19.6614	0.846126	-0.974775	0.149752	-0.834217	-0.0398526	0.554504	0.250803
yEpi49-1	Zm00001d048469	9	156850438	156852802	BHY	beta-carotene hydroxylase [Zea mays]	10.2782	15.9143	22.2129	0	0	0.0651643	10.7834	5.03823	9.65192	0	0	0.364993	168.503	21.0718	55.5805	34.8697	2.74395	20.5131	8.76226	7.29356	7.25198	3.2351	NA	0.606115	NA	-0.531867	0.106223	-1.05662
yEpi49-1	Zm00001d048470	9	156886005	156889520	infB	PLAC8 family protein [Zea mays]	20.2286	24.7287	26.0805	19.0743	6.9763	16.4294	55.7971	54.2647	51.3597	38.9451	9.24865	22.7702	76.4578	85.6329	68.9441	69.9838	68.344	59.6399	38.2454	36.3274	19.6968	1.60081	0.562756	-4.7913	-0.0893481	-2.63784	-11.6158	-18.3413
yEpi49-1	Zm00001d048472	9	156918352	156922586	FZR2	Protein FIZZY-RELATED 1 [Zea mays]	6.99234	6.90695	7.44804	5.23773	4.21682	6.07127	15.4833	9.3437	13.0275	17.3548	9.15069	9.7351	24.3318	17.5299	16.2237	21.9539	14.5528	17.433	15.5684	7.93727	10.4848	11.6722	2.63292	0.200023	-0.857532	-1.38406	-0.221684	-0.332341
yEpi49-1	Zm00001d048473	9	156924729	156931203	SCE1	ubiquitin-conjugating enzyme E2 I [Zea mays]	13.8699	6.79628	8.47296	7.95995	2.78854	6.64919	59.5996	38.2526	52.6447	27.4023	10.8491	18.3393	47.0406	15.1917	34.614	35.5464	30.7998	36.911	16.8876	13.9871	10.0226	-0.525936	0.493073	0.348392	-0.0950195	0.219657	1.57502	-3.73367
yEpi49-1	Zm00001d048474	9	156960598	156980213	MADS50	MADS1 [Zea mays]	11.1901	1.95105	6.24795	39.3164	13.9776	30.7815	114.8	80.4707	94.0839	65.8134	25.5128	40.2499	37.2175	7.83039	24.1233	64.4287	34.548	62.325	45.2955	25.8134	23.0576	-0.0698428	0.326343	-0.206904	-0.26864	0.108849	0.859192	-1.28291
yEpi49-1	Zm00001d048476	9	156984273	156985316	AT4	Acyltransferase [Zea mays]	8.81114	5.53539	8.34719	0.460711	0.917283	0.579634	1.76018	5.86012	4.75716	3.83942	0.918894	1.11242	9.47647	0.123026	4.13082	6.93251	3.5776	6.4092	1.78892	0.05704	1.16349	0.716737	-0.47906	0.461964	-0.867475	-0.143033	0.688036	0.277743
yEpi49-1	Zm00001d048479	9	156995451	156996912	At3g49470	0scent polypeptide-associated complex alpha subunit-like protein [Zea mays]	2.28664	1.87564	2.00808	2.255	0.763073	3.17842	1.48478	5.243	2.70074	3.62266	0.757974	0.973383	0.504354	4.69616	2.71062	11.7167	7.31683	9.72045	41.7664	25.894	24.017	-0.355541	2.23789	-0.352909	-0.849611	0.0526588	0.0925757	-1.2365
yEpi49-1	Zm00001d048480	9	156999447	157005117	TOM3	Tobamovirus multiplication protein 3 [Zea mays]	18.7965	20.9579	21.221	5.43845	4.91145	4.83279	21.6069	26.4225	24.5206	11.4354	12.7617	9.29782	21.036	26.5547	20.3631	31.7642	29.5303	27.2091	33.5464	25.6377	34.0258	1.24347	-1.29852	0.210124	-4.22339	-1.24388	-3.07826	1.12123
yEpi49-1	Zm00001d048483	9	157065287	157067801	THO7B	ngg1 interacting factor 3 like 1 binding protein 1 [Zea mays]	42.035	45.9636	39.1346	9.96652	15.6046	12.7655	87.3324	86.404	85.5774	34.3675	44.7094	27.567	61.8255	61.4748	55.2846	71.4991	74.196	75.2001	38.9274	33.9641	32.9318	-2.47658	-0.00711975	-2.78072	-2.31513	-36.299	1.74464	-1.416
yEpi49-1	Zm00001d048486	9	157071764	157073242	Dgcr14	DGCR14 protein [Zea mays]	0	0	0	0	0	0	0	0	0	0	0	0	0	0	0	0	0	0	0	0	0	NA	NA	NA	NA	NA	NA	NA
yEpi49-1	Zm00001d048491	9	157090097	157090813	H2B1	Histone H2B [Zea mays]	150.396	193.399	183.277	66.5983	25.7228	66.5332	782.271	848.116	859.671	94.8292	68.1638	98.3915	46.5403	97.1712	91.6033	163.592	271.227	499.2	22.2532	24.1395	16.619	0.529245	0.996811	1.35096	1.26719	0.780061	5.23608	-6.97398
yEpi49-2	Zm00001d047799	9	142104187	142106884	HSP70	Heat shock 70 kDa protein 5 [Zea mays]	81.2984	82.8783	65.9384	36.677	39.2329	35.3011	0.388291	0.581923	1.10358	26.6033	20.4504	16.7536	77.384	3.40799	28.4303	2.74079	1.98057	1.04935	1.39315	0.878853	1.20112	-20.4438	-2.0767	6.38807	-2.20164	-0.3235	-3.44989	0.253234
yEpi49-2	Zm00001d047800	9	142110332	142111936	-	SLT1 protein [Zea mays]	12.5489	6.33278	11.8542	2.52216	1.17641	4.39448	24.1846	7.6833	14.266	4.70462	1.82223	3.46751	41.7032	8.7164	21.0128	27.8208	9.54955	15.7207	52.2744	14.4632	32.5316	0.776489	3.78256	-0.202153	0.141608	-0.254466	-0.324496	-0.0442861
yEpi49-2	Zm00001d047801	9	142137063	142141520	Xylt1	PREDICTED: BGGP Beta-1-3-galactosyl-O-glycosyl-glycoprotein isoform X1 [Zea mays]	12.1061	12.7436	11.5419	6.24763	20.5511	11.4137	18.1764	13.2063	14.8307	9.52532	25.6136	11.7983	6.41383	4.47529	6.05781	16.0597	11.9977	14.464	6.52108	5.23428	4.77798	-2.77022	-0.277645	-0.346332	-0.717439	0.632698	0.214346	-1.70921
yEpi49-2	Zm00001d047804	9	142203289	142205193	At4g32285	PREDICTED: probable clathrin assembly protein At4g32285 [Musa acumi0ta subsp. malaccensis] [Musa acumi0ta]	26.2318	22.8619	24.8231	8.65708	13.0732	11.3759	52.2603	50.2214	48.699	51.597	45.5608	44.3562	46.1921	34.8791	38.0233	59.8674	46.8746	47.9282	21.691	20.2635	24.5683	0.16394	0.231312	-2.49336	-1.39916	-0.444153	-0.837828	5.0313
yEpi49-2	Zm00001d047805	9	142245020	142254543	Zdhhc17	DHHC zinc finger domain containing protein [Zea mays]	12.736	8.7014	8.65142	1.04979	2.90427	1.49207	16.2506	21.4298	17.5922	3.39941	10.6549	4.97182	21.1377	32.6457	23.8029	13.7546	21.9186	14.9125	17.7264	18.7603	17.5957	-1.02478	-0.523016	-0.481917	-0.566559	-0.53681	-0.716341	-1.25274
yEpi49-2	Zm00001d047808	9	142331434	142336808	TBP1	initiator binding protein1 [Zea mays]	11.3472	17.7834	12.7331	6.5427	34.3296	12.9631	26.3473	26.0364	25.7286	11.3483	31.5869	17.9571	22.521	35.3084	28.7832	38.4434	44.4404	31.4322	44.6436	58.9821	56.8929	-0.569326	-0.537885	-2.98031	-0.346912	-0.0205801	-3.33821	0.70858
yEpi49-2	Zm00001d047812	9	142388915	142393403	ORP3A	oxysterol-binding protein [Zea mays]	41.4137	48.1618	49.1785	30.3282	28.2496	31.9532	57.5533	56.7833	58.0721	70.3369	53.7676	50.6602	156.332	97.4249	143.455	72.5343	67.6953	68.1151	43.2724	37.3632	42.423	1.30133	2.56365	2.34738	-1.37508	0.562815	-0.826468	0.712527
yEpi50-1	Zm00001d032845	1	239926166	239927481	At4g12780	3-hydroxy-3-methylglutaryl-coenzyme A reductase 2 [Zea mays]	25.2878	21.8228	26.6591	8.622	7.13748	7.70821	48.6962	50.5772	45.9762	20.4346	25.4704	21.8438	29.6296	35.4353	27.5672	47.2129	50.8302	45.8603	17.6971	20.5911	16.993	1.79156	-0.23109	-3.89224	-0.44035	-1.71051	-1.74782	-1.48656
yEpi50-1	Zm00001d032849	1	239984978	239990767	RNF141	RING/U-box superfamily protein [Zea mays]	9.02915	12.1606	6.09187	0.947491	1.58725	0.956219	18.4044	11.0778	12.6579	4.96298	3.41452	4.30417	13.2468	8.45619	7.58482	13.9517	11.8605	13.4247	3.553	4.66724	1.88294	-2.87599	-0.972714	-0.56868	0.149073	-1.36378	0.495999	-3.99768
yEpi50-2	Zm00001d042146	3	153564761	153570791	HXK3	hexoki0se4 [Zea mays]	29.7874	35.0255	28.9608	24.7771	47.3097	51.4721	27.7861	32.568	29.0845	35.1809	59.156	36.5494	12.8226	15.7405	15.9974	19.76	32.0192	28.2523	14.5874	14.1155	33.4875	-1.31561	1.36946	-0.456924	-0.885841	1.17611	0.385465	81.1088
yEpi51-1/yEpi52-1/yEpi53-1	Zm00001d028154	1	24416953	24417897	SAT4	serine acetyltransferase 2 [Zea mays]	1.41306	1.85341	3.10087	2.05258	2.85477	2.05776	0.392056	0.75138	0.797781	2.29203	2.46293	2.62836	0.738329	0.234845	1.32717	0.828567	0.974857	1.0201	1.8866	2.73391	2.70901	6.66581	-0.987084	1.25827	2.93595	3.33907	1.61854	0.941224
yEpi51-1/yEpi52-1/yEpi53-1	Zm00001d028160	1	24589912	24593712	Sb01g044070	CASP-like protein 2B2 [Zea mays]	75.292	32.9434	44.1685	0.274341	0.629383	0.801847	84.1996	76.3306	80.4289	18.4702	10.2312	5.62302	120.335	131.846	172.895	102.041	66.7299	115.648	6.8652	6.43581	2.76917	-0.469872	1.97152	0.0416423	-2.11863	8.13263	1.77068	-18.0782
yEpi51-2	Zm00001d052945	4	205815603	205819193	EMB1687	PREDICTED: probable ribonuclease P/MRP protein subunit POP5 [Setaria italica]	35.5399	29.9226	42.6653	19.2937	5.12398	13.8609	59.2754	59.3894	65.8879	42.4701	17.361	36.4167	36.2725	35.6929	33.1707	48.5055	48.1794	57.2822	10.8341	10.4435	7.67349	3.537	0.233181	114.977	0.517832	-9.70335	54.8361	-15.1838
yEpi51-2	Zm00001d052947	4	205833914	205836511	-	D0J heat shock N-termi0l domain-containing protein [Zea mays]	27.1512	39.0417	25.8817	0.632404	1.03997	0.528627	8.5198	8.56271	9.40781	1.30026	1.79353	1.44321	16.4254	22.227	11.3595	18.534	16.3338	13.5156	5.98504	5.2366	4.85272	-1.21353	-1.50925	40.3889	-0.420416	-2.7464	-3.56186	-2.02581
yEpi51-2	Zm00001d052948	4	205895319	205899917	CCT8	T-complex protein 1 subunit theta-like [Zea mays]	84.2611	74.9623	86.3573	8.90002	12.8294	12.3361	106.883	100.632	99.3978	42.9328	55.7195	31.6872	55.3592	72.9012	68.985	66.0128	80.4113	81.9406	26.192	23.6401	16.6725	1.45086	0.74895	-1.39501	-2.75895	0.553504	1.21244	-6.46065
yEpi5-2	Zm00001d045665	9	32284202	32294854	RAD23	D0 repair protein RAD23 [Zea mays]	102.979	83.8919	90.5277	55.7744	54.1456	65.2331	194.521	176.992	176.282	194.605	157.838	152.468	244.893	212.19	216.679	191.185	184.562	181.828	103.608	94.683	94.8731	-0.304696	12.6142	-1.08109	-1.29214	-0.725441	-1.82539	-0.957398
yEpi52-2	Zm00001d052950	4	206094011	206095432	At5g15350	uclacyanin-2 precursor [Zea mays]	17.4013	41.4499	39.4306	1.95915	5.16296	2.27114	15.4668	20.7941	20.7329	3.30463	16.0286	4.9846	7.98734	13.0079	24.9309	70.1599	41.421	55.8758	16.8944	21.3927	14.5705	0.832063	-0.805235	0.976996	-0.735937	5.74966	0.0059438	-2.03321
yEpi52-2	Zm00001d052951	4	206108330	206113498	-	PREDICTED: proline-rich receptor-like protein ki0se PERK2 [Setaria italica]	18.3533	31.9498	30.0823	7.13266	9.88672	8.06742	58.7	63.0542	59.5204	20.3203	24.3169	16.5726	20.3136	25.7344	23.5946	25.4765	34.0511	37.2029	13.4432	20.5718	14.6625	0.725296	-0.321177	-0.623153	-2.87552	0.210514	1.73513	-0.657921
yEpi52-2	Zm00001d052952	4	206113707	206115890	At5g18180	h/ACA ribonucleoprotein complex subunit 1-like protein 1 [Zea mays]	45.5628	79.7862	77.9098	6.01411	4.1457	5.60567	92.3411	112.417	105.555	31.9527	26.7342	11.3221	8.98808	7.28054	11.3195	22.9237	29.5446	48.8169	6.128	7.42566	2.70813	0.890343	0.562793	0.316402	-6.90681	3.73076	6.82167	-6.27083
yEpi52-2	Zm00001d052953	4	206116499	206121004	APUM12	Pumilio homolog 12 [Zea mays]	7.78488	7.3914	8.23777	8.68884	13.5631	12.8142	4.30709	4.82036	4.70026	20.4969	27.897	21.5498	5.99595	13.0285	7.23451	4.95337	8.3984	6.25949	1.5957	2.13777	1.00111	3.30197	0.692723	0.532025	-0.715429	-0.647762	-0.241739	-3.19374
yEpi53-2	Zm00001d053022	4	209718384	209734577	GTE12	Transcription factor GTE12 [Zea mays]	56.6848	79.3866	63.5588	21.1651	40.5256	31.2521	76.4119	80.398	74.6056	53.6438	86.7786	66.373	52.1836	48.9733	35.8483	65.5713	61.2664	55.9193	30.9155	30.0219	32.6667	-0.394404	0.0420181	-1.90629	-0.231672	-9.17686	-3.48419	4.91955
yEpi54-1/yEpi55-1	Zm00001d029336	1	66388200	66393060	At1g26850	PREDICTED: probable methyltransferase PMT2 [Zea mays]	19.7055	15.8506	17.983	0.674571	1.46641	0.856262	27.5743	20.1376	22.6753	3.79622	6.04707	3.13703	15.9124	24.5415	17.9091	23.3516	22.5016	21.5245	36.0324	23.5638	20.032	0.106335	-0.541093	-0.31752	-1.58572	-0.537208	-3.29896	-1.56652
yEpi54-1/yEpi55-1	Zm00001d029339	1	66569893	66572838	BHLH47	amelogenin precursor like protein [Zea mays]	42.0569	27.9975	32.6352	4.1149	6.44565	18.8612	9.43704	13.948	11.7776	18.6141	54.4233	23.0467	6.56452	9.95864	5.73205	7.73977	10.7657	6.40682	7.12985	8.36754	6.87571	-0.340272	11.6536	0.0377311	-0.752432	-1.49053	-1.88101	-1.41067
yEpi54-1/yEpi55-1	Zm00001d029342	1	66637546	66648174	PUS3	tR0 pseudouridine synthase [Zea mays]	16.8706	29.4205	26.7105	8.43412	18.6634	16.9371	20.3295	19.1961	18.2903	11.9199	16.9696	18.2295	29.7583	22.4572	16.9977	17.5797	17.4295	15.9773	7.25775	4.42467	7.41515	0.568133	0.662477	-2.59857	1.49901	-2.49552	-20.3423	1.11112
yEpi54-1/yEpi55-1	Zm00001d029343	1	66648726	66655094	At1g71790	F-actin capping protein [Saccharum hybrid cultivar R570]	25.7981	28.2689	34.0463	3.0605	4.82933	3.95206	40.9924	35.7727	43.0872	12.9032	24.9453	11.1762	33.0614	37.2278	24.8251	34.8691	38.0855	34.0956	28.1874	12.4062	12.9272	5.67662	0.00807368	1.8026	-1.28682	-4.9536	-1.48094	-0.933975
yEpi54-2	Zm00001d003630	2	51047805	51050712	Acot13	PREDICTED: acyl-coenzyme A thioesterase 13 [Zea mays]	15.7675	21.7034	19.0663	4.34069	6.72922	5.21737	18.7157	21.8972	20.6973	17.3542	21.9477	14.1969	54.9259	55.9246	53.1567	32.5026	35.1765	29.7958	12.6867	13.8251	8.42952	0.111473	-0.265923	0.245723	-2.37471	-4.54301	-3.02452	-8.47918
yEpi54-2	Zm00001d003632	2	51106489	51111751	UVR8	regulator of chromosome condensation2 [Zea mays]	42.3006	39.8806	47.3416	0.096433	0	0	86.2633	89.9794	91.2376	2.9338	0.575404	0.717525	352.806	312.214	246.689	227.916	157.361	177.28	82.4963	59.7103	57.3648	5.16623	-1	1.67714	-0.879477	-4.22843	-0.435376	-1.20587
yEpi56-2/yEpi57-2/yEpi58-2/yEpi59-2	Zm00001d017768	5	206249303	206254075	-	hypothetical protein ZEAMMB73_Zm00001d017768 [Zea mays]	7.86321	8.35522	8.47193	1.51321	3.75343	4.12776	10.9582	8.89548	10.7448	2.40264	3.71665	2.44287	6.12069	11.6121	8.13391	13.7892	11.9664	12.5473	42.3616	44.1648	56.8384	1.47442	1.3342	0.793143	-0.938765	-0.266768	-0.362679	15.0567
yEpi56-2/yEpi57-2/yEpi58-2/yEpi59-2	Zm00001d017769	5	206296072	206299206	ARGF	Ornithine carbamoyltransferase chloroplastic [Zea mays]	30.0085	21.1289	23.8004	6.16941	6.20328	6.65664	45.1649	38.2718	42.5245	45.5654	29.5627	35.3106	19.8966	29.4312	30.9279	30.9029	30.4012	34.9044	12.2664	13.6278	7.12921	-0.398269	27.7729	0.233904	-0.281637	1.31394	16.9517	-8.54683
yEpi56-2/yEpi57-2/yEpi58-2/yEpi59-2	Zm00001d017770	5	206299496	206304043	IPP	Soluble inorganic pyrophosphatase 2 [Zea mays]	1.19067	10.2529	6.13656	0	0	0	10.9114	69.684	35.5726	0	0	0	6.06748	52.9992	28.5523	10.4063	70.455	38.714	90.1672	117.552	135.999	0.091533	NA	-0.160793	NA	-0.0418063	-0.0571739	2.34727
yEpi56-2/yEpi57-2/yEpi58-2/yEpi59-2	Zm00001d017771	5	206343101	206346122	PLR3	PREDICTED: probable pinoresinol-lariciresinol reductase 3 [Setaria italica]	16.0038	13.2184	14.7837	4.46918	5.68565	4.58815	14.562	17.9126	16.5394	10.2507	20.5496	12.6149	23.8761	33.5361	29.4847	22.5803	28.1433	23.8794	11.7502	8.77063	6.16411	0.123924	-0.804406	0.180293	-0.540889	0.1612	-0.532943	-2.74959
yEpi56-2/yEpi57-2/yEpi58-2/yEpi59-2	Zm00001d017772	5	206349763	206353137	use1	cation cation antiporter [Zea mays]	21.3562	27.0754	23.6337	8.96746	11.5415	8.23807	40.08	48.9946	46.4706	26.2083	32.6506	25.2016	24.4474	31.3765	26.7708	27.4795	33.8081	29.1751	15.9536	20.8203	14.0858	-0.203566	-1.56674	0.433743	-1.31251	-0.329358	-0.464158	-1.76758
yEpi56-2/yEpi57-2/yEpi58-2/yEpi59-2	Zm00001d017773	5	206380933	206384191	TULP5	Tubby-like F-box protein 5 [Dichanthelium oligosanthes]	29.7699	30.0065	31.5915	8.9051	11.2026	10.2905	83.5196	77.9709	77.4797	24.4824	26.5129	19.7329	58.6653	57.0968	67.9082	54.4356	46.2474	55.6556	8.52899	10.8826	9.03512	14.3978	0.20598	-1.17706	-5.67821	12.7858	1.29797	-0.569901
yEpi56-2/yEpi57-2/yEpi58-2/yEpi59-2	Zm00001d017777	5	206411178	206414564	slr1101	Adenine nucleotide alpha hydrolase-like superfamily protein [Zea mays]	21.6564	16.156	19.6407	5.19938	6.49946	7.78776	31.1428	30.3058	31.4546	12.6055	9.15088	10.9275	5.28769	18.6292	13.0487	40.7792	52.9687	48.7633	22.8019	37.0105	24.3066	0.267087	2.98187	1.74503	0.0285423	0.163429	0.310004	-0.788205
yEpi56-2/yEpi57-2/yEpi58-2/yEpi59-2	Zm00001d017780	5	206546325	206552409	PUB6	Ubiquitin-protein ligase [Zea mays]	6.94687	5.71055	4.71484	6.10152	4.27028	7.49334	8.24556	7.4822	6.66232	8.94914	9.08867	8.45186	27.7956	24.1563	19.3249	8.00073	7.85019	5.79527	9.48339	9.26127	6.57808	-2.61078	2.52009	-3.14805	-8.12821	-3.65507	-28.3001	-25.16
yEpi57-1	Zm00001d004458	2	113246759	113251908	Adat3	Cytidine/deoxycytidylate deami0se family protein [Zea mays]	17.5645	11.0688	11.8632	1.52383	1.09677	1.51028	27.5589	24.8234	24.304	12.6673	12.4899	8.31248	16.5657	16.1387	15.2114	23.4641	20.8766	22.8269	8.85816	10.8963	5.58598	-0.755409	0.936557	-1.37971	-48.098	-5.34302	0.507466	-4.21098
yEpi57-1	Zm00001d004460	2	113301631	113309328	AAR2	AAR2 protein family [Zea mays]	22.3842	23.7872	17.6327	1.07534	2.61179	1.42677	19.9174	32.7708	26.1896	2.65852	13.06	4.02507	5.18415	23.5986	9.4989	4.64244	20.7145	14.6171	1.53683	5.34376	2.11209	-7.77351	-0.542545	-0.0240523	-0.737238	-0.531374	0.241243	-0.697781
yEpi58-1	Zm00001d004478	2	114435461	114439440	HCF101	Fe-S cluster assembly factor HCF101 chloroplastic [Zea mays]	1.72524	6.79243	4.86817	1.7496	0.108702	2.07339	3.88211	9.79968	6.15698	1.66898	0.365666	0.457625	19.6404	16.6225	16.6386	11.9678	20.1793	14.0062	53.8467	43.7006	53.7667	0.240502	1.39465	-0.231145	-0.858884	-0.989305	-0.503542	0.98424
yEpi58-1	Zm00001d004482	2	114558262	114558645	DDB_G0277575	transmembrane-like protein [Zea mays]	7.43239	8.21915	11.2167	1.13689	0.742403	1.46761	9.78504	7.21241	9.1689	4.14438	3.5877	2.9771	7.38747	4.16871	7.08871	14.9452	11.2496	14.4734	10.439	22.4322	9.36982	8.61999	2.6767	0.521006	-3.19371	0.814367	0.74468	-1.1783
yEpi59-1	Zm00001d004521	2	116470474	116480753	SWI3D	SWI/SNF complex subunit SWI3D [Zea mays]	10.6939	17.2411	15.457	1.29889	2.85949	1.35653	22.8427	25.041	21.5317	5.92612	11.6851	5.39794	13.4725	15.5476	12.1478	13.6056	15.8464	16.6636	3.0497	2.81451	1.75282	0.454997	-0.926125	-2.19266	-1.18343	-2.27677	1.72941	-10.028
yEpi59-1	Zm00001d004523	2	116567249	116568460	-	mater0l effect embryo arrest 60 [Zea mays]	2.70003	10.3959	8.24893	1.16859	0.0933537	0.339789	0	0.233024	0	3.719	2.05612	2.24729	5.87469	9.14694	8.862	18.4941	22.8478	2.34049	7.06463	9.95055	6.02829	0.44204	-0.541619	-1	-0.770063	0.825847	-8.42076	-1.71821
yEpi60-1	Zm00001d041346	3	113860754	113865747	CTU2	PREDICTED: cytoplasmic tR0 2-thiolation protein 2 [Setaria italica]	16.8283	9.75082	13.8475	2.92972	5.57561	4.88853	26.7868	14.9653	20.3939	9.4098	11.0489	8.02487	13.8593	6.77056	10.2458	15.1296	9.12683	15.183	6.78752	7.17254	5.47485	0.157661	0.480644	-0.0815658	-2.68983	-0.0195054	1.01779	-7.8187
yEpi60-1	Zm00001d041352	3	113916459	113919793	APT1	PREDICTED: adenine phosphoribosyltransferase 1 [Setaria italica]	157.341	110.208	133.741	27.0428	31.6741	21.6651	343.947	238.268	302.346	163.148	225.61	127.781	267.121	169.714	210.443	324.763	152.601	292.105	153.394	115.277	113.437	NA	-3.32231	0.212697	-2.13245	-0.163734	0.62062	-1.09654
yEpi60-2	Zm00001d050915	4	130729909	130734070	RABB1C	ras-like [Zea mays]	22.5604	22.5445	21.1477	14.0912	14.2888	16.0637	51.9434	49.4552	56.9717	26.557	44.7347	20.1563	65.5803	79.556	80.4958	63.6867	61.198	61.2634	100.559	99.3668	148.847	-176.388	18.9593	5.04173	-1.70423	1.13448	-0.947376	81.9887
yEpi60-2	Zm00001d050916	4	130734772	130738021	Snrpd1	Small nuclear ribonucleoprotein family protein [Zea mays]	143.552	104.172	120.722	11.3316	10.73	11.2811	257.907	318.223	261.004	66.0931	63.4547	58.0559	84.0115	96.1669	85.0105	145.644	147.058	206.124	45.7202	49.6214	32.7356	-0.159474	0.832038	-0.89728	-5.09255	-0.83562	84.4914	-7.65667
yEpi60-2	Zm00001d050917	4	130884294	130889709	GDPDL4	Glycerophosphodiester phosphodiesterase GDPDL3 [Zea mays]	35.8626	51.8468	42.4715	6.61972	14.008	7.89009	88.2426	91.0353	88.9514	17.1206	34.4548	18.0462	22.0777	20.6639	24.1869	67.4018	94.7705	94.949	39.9919	24.6496	37.1108	-0.173067	-0.656109	-0.492388	-0.893202	3.98352	1.01305	0.624418
yEpi6-1/yEpi2-2	Zm00001d040118	3	28238999	28239742	-	sarcoplasmic reticulum histidine-rich calcium-binding protein [Zea mays]	25.2762	11.9342	18.1289	3.00934	2.50597	2.13641	48.6351	32.2625	39.2954	5.96648	7.22557	4.30163	44.7817	21.6075	28.6215	46.6342	27.9568	37.77	22.5597	9.14453	12.2203	-0.0713977	-2.46836	-0.140893	-3.64452	-0.394671	0.0508088	-0.541443
yEpi61-1	Zm00001d049054	4	14033618	14051717	ULP2B	Cysteine protei0ses superfamily protein isoform 1 [Zea mays]	78.3696	54.6193	67.2679	3.96447	7.96381	6.01041	50.104	43.1217	42.4559	17.2912	12.6963	14.9525	17.4783	34.5898	27.9328	27.2648	32.1421	42.6716	18.1562	13.8491	14.8697	0.0651299	0.0231409	-1.1907	-0.0179574	0.221923	5.3177	-0.526076
yEpi61-1	Zm00001d049055	4	14072313	14076058	SCPL42	Serine carboxypeptidase F13S12.6 [Zea mays]	27.1815	19.9233	24.6869	0.0588457	0	0	19.3572	22.5777	18.3605	8.85561	8.11127	1.81828	5.45981	18.0805	12.6983	5.26636	5.043	7.93389	9.48093	6.82151	6.84207	0.312605	-1	-1.61898	-17.909	0.147086	24.8856	-0.984541
yEpi61-2	Zm00001d039144	6	171009263	171031047	CAS1	Protein REDUCED WALL ACETYLATION 3 [Zea mays]	15.6189	13.0455	14.7957	3.04412	3.48839	3.08499	31.8448	28.6676	29.6743	9.69112	12.9133	8.12334	25.4465	32.8712	32.5399	163.338	114.781	38.331	29.1481	24.7578	18.0021	0.360248	-0.816008	-0.366309	-1.9731	0.910756	-4.14886	-4.07754
yEpi61-2	Zm00001d039145	6	171033311	171034198	HNRNPF	R0 binding protein [Zea mays]	56.0806	30.7785	42.8018	9.15143	12.4015	9.62655	107.086	84.7711	95.5288	45.7255	61.7603	42.6005	50.692	47.6648	50.6221	65.7022	61.4918	78.7499	43.096	36.6573	37.7239	-0.0496248	-0.707626	-0.0358044	-1.38977	0.953781	7.19795	-0.668677
yEpi61-2	Zm00001d039147	6	171041056	171048997	Snx16	Phox-associated domain [Zea mays]	40.0564	29.7328	31.3624	16.7753	11.327	19.6966	29.9942	26.874	28.7881	54.0576	38.7423	41.016	134.615	66.4714	73.1037	52.21	31.2181	32.6905	37.7121	18.908	35.1063	-0.684307	2.07237	0.226879	-0.703074	-0.805342	-0.859718	0.722844
yEpi61-2	Zm00001d039148	6	171049832	171050563	-	harpin-induced protein [Zea mays]	22.1133	13.6853	34.3247	0.158391	0	0.0559893	0.435446	0.583716	1.13071	0.101379	0	0.898552	13.9204	14.4881	14.6799	4.73532	4.13378	3.25564	4.37634	8.92856	2.6	3.89779	-0.293025	8.37833	16.7267	1.67566	-3.91958	-1.78043
yEpi61-2	Zm00001d039154	6	171163852	171169201	RPN13	26S proteasome regulatory subunit RPN13 [Zea mays]	50.2871	39.9786	45.3225	16.0092	22.7614	21.8959	106.284	111.263	109.821	56.4798	75.0844	52.5929	75.2961	80.7284	76.7916	79.2874	86.1473	98.0237	40.2369	41.8445	34.7215	0.036788	0.743627	0.420777	-1.41785	-0.449414	4.46254	-7.86142
yEpi61-2	Zm00001d039155	6	171177893	171180993	At1g51745	Tudor/PWWP/MBT superfamily protein [Zea mays]	9.29286	11.7597	10.8462	0.8288	1.48228	0.768872	10.3426	11.2221	10.477	3.18361	7.41039	4.17584	9.44776	13.0872	7.54322	8.85963	7.52881	8.00921	3.15824	3.60681	2.27259	0.259369	-1.18341	-0.69426	-0.530504	-2.0466	-0.278031	-4.94877
yEpi61-2	Zm00001d039156	6	171181094	171184464	ELF3	PREDICTED: protein EARLY FLOWERING 3-like [Zea mays]	10.607	10.8912	11.2179	9.47765	19.4756	14.7836	17.4372	18.039	14.3436	12.0474	16.2085	16.2669	29.9282	18.9646	14.323	15.2038	17.2424	13.2531	18.4672	16.7644	12.4557	3.29887	0.0614078	-11.2819	1.02808	-1.84674	-2.91385	-6.06041
yEpi61-2	Zm00001d039157	6	171239022	171243031	VHA-C	PREDICTED: V-type proton ATPase subunit C [Setaria italica]	72.447	78.0546	70.2263	13.0992	25.3834	15.8658	153.479	122.629	144.634	81.088	113.936	64.1605	98.5333	129.637	121.477	180.149	175.338	181.414	96.6023	89.7935	82.6132	-1.79205	-0.549578	0.42656	-2.03064	0.4753	1.52591	-3.10913
yEpi61-2	Zm00001d039158	6	171285758	171287677	-	PREDICTED: translation initiation factor IF-2-like [Oryza brachyantha]	14.819	13.137	15.6791	14.956	19.6335	15.0696	59.1238	67.065	60.8078	40.4745	75.119	40.2494	35.4821	34.7822	35.4591	39.752	42.2166	52.6533	17.6984	21.2119	14.7853	2.02273	-0.951434	-0.575891	-1.013	0.934339	9.4694	-2.65827
yEpi62-1	Zm00001d007929	2	243169818	243173004	RBP45	PREDICTED: polyadenylate-binding protein RBP45-like [Setaria italica]	15.0958	17.0289	17.4612	8.29263	15.8895	10.0461	15.0709	11.5617	14.5688	15.993	19.5651	16.1209	24.0781	19.3716	20.138	14.3125	7.09607	10.838	13.8452	7.60284	11.2487	1.4473	-0.538359	0.713825	-0.928408	-0.674333	0.0370421	0.168102
yEpi62-1	Zm00001d007930	2	243173881	243177151	TOM1	tobamovirus multiplication-like protein [Zea mays]	92.8774	64.1758	84.7615	22.9513	30.2819	29.7696	63.1773	66.0623	63.5009	97.1956	107.233	83.196	51.8292	56.9147	56.3689	44.9113	40.1685	43.8364	45.535	42.6715	30.4386	0.434465	0.860217	-0.775638	-3.78947	0.785372	0.546713	-9.5439
yEpi62-1	Zm00001d007934	2	243390189	243394709	UTP6	PREDICTED: U3 small nucleolar R0-associated protein 6 homolog [Zea mays]	22.5429	8.73832	14.9406	6.77823	4.87074	7.36807	26.5212	40.9297	31.3905	33.9642	32.0081	28.7181	20.0107	16.2856	17.7654	19.6362	21.6698	24.6066	8.74545	9.02509	6.92563	-0.101422	1.61845	-0.324115	-4.36378	-0.205494	3.88829	-14.0151
yEpi62-1	Zm00001d007936	2	243421943	243422896	PDX11	pyridoxin biosynthesis protein ER1 [Zea mays]	8.09528	12.9466	12.0947	2.28078	1.97817	1.38024	6.61315	15.1006	11.3918	9.05711	11.0957	4.66697	6.72356	8.67739	7.96952	17.121	17.1676	14.913	17.8493	27.0689	9.93874	0.648784	-4.95174	0.12606	-5.30702	0.275406	-95.7995	-2.71605
yEpi62-1	Zm00001d007937	2	243431749	243432764	GGAT2	alanine amino transferase8 [Zea mays]	9.16418	26.9908	15.902	0.412513	0.670793	0.4154	4.81894	191.561	53.8383	1.36566	4.4852	1.69917	17.2715	6.34589	8.98962	17.4429	27.8251	17.6465	994.342	1119.75	2111.65	-0.244067	-0.97765	-0.475004	-0.786184	-0.516048	-0.960774	16.8182
yEpi62-2	Zm00001d044191	3	221504920	221511730	XLG2	Extra-large G-protein-like, partial [Zea mays]	26.0845	19.8771	23.4745	3.48009	6.83688	5.69945	59.4182	49.2731	53.1661	12.2037	14.6615	10.3828	21.6992	24.2786	24.723	44.2978	36.4757	38.136	15.2114	15.7501	12.0608	0.159088	0.32231	-0.23253	-2.48172	1.34453	-0.575481	-12.697
yEpi62-2	Zm00001d044193	3	221614693	221628450	SEH1	Seh1-like protein [Zea mays]	25.1061	30.21	27.147	4.88449	4.94585	4.32045	52.0763	40.3481	45.1959	23.4408	27.808	20.2484	17.3712	19.0989	14.526	28.226	28.9192	33.8819	7.77173	6.91517	4.42216	-0.200263	-19.386	-0.173306	-2.46196	-4.29351	15.3192	-6.82102
yEpi62-2	Zm00001d044195	3	221636992	221642811	At5g53180	Polypyrimidine tract-binding protein homolog 2 [Zea mays]	86.117	93.9891	85.6313	26.384	35.0559	27.8998	99.4892	79.531	86.5403	61.3019	71.2517	49.4903	133.227	85.0269	74.4915	90.265	70.5646	73.9356	38.8341	27.5555	31.4663	-1.12341	-0.650406	-0.297601	-3.37421	-1.43716	-0.657776	-0.306499
yEpi63-1	Zm00001d052742	4	199485321	199490557	gins3	GINS complex protein [Zea mays]	130.473	84.5646	90.0624	8.92544	15.6435	15.9288	152.159	182.309	152.105	82.3031	91.3941	81.831	70.3469	102.563	79.6993	118.411	140.978	156.896	89.0025	75.9228	94.7039	-0.760487	1.08493	-1.00359	-1.10388	-0.41939	2.41075	1.8718
yEpi63-1	Zm00001d052747	4	199611240	199615525	Odr4	oxidoreductase zinc-binding dehydroge0se family protein [Zea mays]	25.1362	17.263	30.3932	7.98505	9.47287	10.1408	42.4732	31.0387	34.5966	32.0667	27.2632	22.9734	25.2147	17.2619	18.8995	30.0864	21.9616	25.9706	26.8545	28.3197	25.0713	2.33542	1.89782	-0.377682	-2.78615	-0.58816	-0.0131605	-3.43427
yEpi63-1	Zm00001d052748	4	199642595	199648641	Slc44a2	PREDICTED: choline transporter-like protein 2 [Zea mays]	5.52123	4.77529	4.97948	0.121094	0.475462	0.249828	6.92016	6.27677	5.35994	1.94448	3.50655	2.08984	1.94955	5.40926	2.87477	7.22776	7.32281	7.95047	0.88768	0.485229	0.499053	-0.452518	-0.273443	-3.84999	-0.813879	-0.465145	14.2061	-0.931299
yEpi63-1	Zm00001d052749	4	199665081	199666577	HMGB7	HMG1/2-like protein [Zea mays]	53.9013	60.2123	70.1388	3.50586	3.23278	3.89251	357.519	454.454	378.85	14.1332	39.7224	14.0401	22.9126	35.3008	30.3864	56.5425	100.538	174.752	6.17188	5.45333	5.19241	4.14577	3.83171	-0.559899	-1.00728	0.206601	4.37374	-1.72623
yEpi63-1	Zm00001d052750	4	199667552	199671247	IDEF1	PREDICTED: B3 domain-containing protein IDEF1-like [Zea mays]	36.4364	64.8603	49.2305	15.2539	25.5811	19.5044	76.1441	63.3597	71.5674	44.664	57.0834	34.3647	27.2664	33.2863	27.3426	51.5893	49.5704	53.4367	45.16	28.5557	32.1837	-0.0997623	-0.176836	0.284027	-2.65856	-0.974666	2.83004	-0.563007
yEpi63-2	Zm00001d012920	5	1958516	1959313	-	PREDICTED: uncharacterized protein LOC103625740 [Zea mays]	0	0	0	0	0	0	0	0	0	0	0	0	0	0	0	0	0	0	0	0.753477	0	NA	NA	NA	NA	NA	NA	-1
yEpi63-2	Zm00001d012921	5	1959713	1963560	Tmem184b	Transmembrane protein 184A [Dichanthelium oligosanthes]	18.8381	25.789	18.7228	8.17008	17.7234	9.52999	50.4949	41.7745	48.8277	26.0639	39.4329	31.1572	42.8742	37.0141	40.4363	59.246	56.0096	53.2839	28.6463	31.6359	32.6194	-1.03319	-0.7153	0.617633	-0.238039	0.167956	-2.68437	1.658
yEpi63-2	Zm00001d012922	5	1978763	1993142	Os03g0827700	R0 helicase3, partial [Zea mays]	4.34485	1.81977	3.9106	0.84746	0.251168	0.615078	9.81225	8.23506	8.85074	1.08977	1.11828	0.959798	8.19109	4.34925	6.76176	10.1194	9.50836	11.1536	23.9983	12.8897	14.6787	0.656053	0.220576	-0.219263	-10.1169	0.255916	4.38474	-0.677912
yEpi63-2	Zm00001d012923	5	1993895	2003080	-	RMUA [Zea mays]	10.6463	7.79884	7.56422	1.22562	2.27184	1.62122	19.8719	8.33255	11.1036	8.34335	10.0433	7.34242	9.97817	7.90413	4.73978	13.0472	6.50378	7.96156	5.51965	3.42629	5.97018	-1.16479	-0.24376	-0.519715	-2.1776	-4.05138	-0.55443	1.43043
yEpi63-2	Zm00001d012924	5	2004892	2007704	NPC1	PREDICTED: non-specific phospholipase C1 [Setaria italica]	13.8268	13.6943	12.5935	1.82558	3.72891	1.3771	17.9836	21.2761	18.5935	3.73403	4.70397	1.0819	86.0843	88.9185	78.6353	52.1211	55.3341	31.5294	23.3753	37.256	32.2243	-17.6239	-1.47126	-0.629526	-6.46864	-6.25639	-13.8175	0.275001
yEpi64-1	Zm00001d049252	4	22932092	22935601	SWEET14	mtN3-like protein [Zea mays]	4.61901	4.61541	7.13005	14.8084	7.1531	8.10816	13.0251	15.0635	21.5515	17.1531	31.4435	24.3935	0	0	0	48.9555	28.5306	98.9093	0.937423	0.681697	0.878524	1396.41	-0.750484	7.36588	0.0133179	NA	5.89146	0.539358
yEpi64-2	Zm00001d013071	5	4310449	4311941	IAA24	IAA14 - auxin-responsive Aux/IAA family member [Zea mays]	2.92101	1.30028	1.14977	0	0.124053	0.0485197	14.0379	10.8516	14.415	0	0.063069	0	37.6114	15.7457	31.4086	12.892	8.71237	16.2866	79.5685	7.76432	18.5977	-1.18572	-0.217761	1.23669	-1	0.432646	2.62434	-0.698251
yEpi64-2	Zm00001d013072	5	4313552	4316490	efg1	DUF2361 family protein [Zea mays]	36.5672	54.5023	53.7798	36.5286	47.8564	43.333	69.3002	90.2175	81.6825	73.3863	64.0799	60.1246	48.2791	62.823	49.2202	48.0494	50.3083	59.6796	37.0815	40.1067	38.0151	0.919432	0.201366	0.183924	-1.85001	-0.870594	9.29697	-0.382764
yEpi64-2	Zm00001d013073	5	4321102	4333658	UNE12	PREDICTED: transcription factor UNE12-like [Setaria italica]	2.50307	4.19505	3.63277	3.93186	7.23554	3.77731	13.6369	8.85822	13.0203	7.31819	12.7039	8.72835	9.81685	4.80902	7.86111	12.5779	14.8085	18.4033	3.34207	4.07056	3.09372	0.335359	-1.09356	0.74193	-0.476331	0.218925	4.22335	-1.68181
yEpi64-2	Zm00001d013074	5	4364153	4367765	CPRF2	Basic leucine zipper 25 [Zea mays]	36.4678	22.3543	24.0273	4.04896	5.05146	3.32526	47.5535	47.6234	46.7112	14.2683	22.6264	14.0661	59.9535	29.0319	25.0587	39.6107	32.4497	37.5582	16.8409	16.6119	13.4623	-0.762929	-2.44379	-25.0753	-1.04839	-1.25698	0.426771	-28.5142
yEpi64-2	Zm00001d013075	5	4368506	4377758	GBP4	Guanylate-binding family protein [Zea mays]	12.035	12.7552	12.1307	0.375194	0	0.0574287	24.6195	27.7667	22.8743	1.65509	0.792775	1.25208	14.749	17.1236	15.4228	22.676	22.7775	22.4387	10.0501	11.384	6.78529	-0.733991	-0.693872	-2.10903	0.0652742	-0.432474	-5.67342	-5.89516
yEpi64-2	Zm00001d013076	5	4379338	4381854	RPL4A	PREDICTED: 60S ribosomal protein L4-1-like [Setaria italica]	19.22	17.0575	20.9441	7.13438	3.44881	6.03226	34.6631	34.6723	33.1628	37.4052	23.9074	22.0872	11.3809	20.1692	20.8669	25.3589	27.3654	32.4105	13.5352	11.3111	7.57767	2.59458	0.401927	-326.906	-1.26971	1.15879	6.02885	-4.35742
yEpi64-2	Zm00001d013078	5	4419199	4421924	At4g15470	transmembrane BAX inhibitor motif-containing protein 4 [Zea mays]	19.9887	15.0799	15.5107	19.6061	11.8076	16.8782	31.6952	21.4225	26.5729	42.0695	29.9433	33.7211	31.2698	28.0925	27.1079	33.5879	26.9969	31.4548	34.4459	57.7395	31.2045	-0.824459	0.300385	NA	-0.37692	-1.61981	0.352743	-1.27831
yEpi64-2	Zm00001d013079	5	4422306	4427048	At3g04780	PREDICTED: LOC100280535 isoform X1 [Zea mays]	21.0388	48.1927	30.1961	3.68734	14.1989	5.73558	42.7107	50.8873	44.4717	20.5298	33.2299	19.5461	23.0922	34.463	33.9794	50.0206	45.4879	44.0143	22.031	20.508	20.9608	-0.325525	-0.610288	-0.569244	-1.15491	0.914939	-1.65019	-0.405326
yEpi64-2	Zm00001d013083	5	4461282	4476568	XRN4	5'-3' exoribonuclease 4 [Zea mays]	45.6321	39.5422	45.519	9.52499	12.897	11.2481	59.3168	58.8936	49.1908	27.0617	32.6196	32.1356	51.6646	54.4414	39.3362	43.5034	40.3429	38.8787	26.7035	17.435	21.5962	0.96284	0.022008	-46.8524	0.825843	-9.87949	-1.92657	-0.102089
yEpi64-2	Zm00001d013086	5	4528515	4530286	RPS18A	ribosomal protein S18 [Zea mays]	234.584	155.463	138.504	36.7377	44.9904	42.6334	228.614	201.352	198.038	327.208	160.918	207.764	257.873	110.076	174.584	187.245	134.262	187.312	113.31	66.9812	48.9999	-1.42868	0.428788	-1.24316	-0.436568	-0.12708	1.00253	-1.77625
yEpi65-1/yEpi66-1	Zm00001d053855	4	242281659	242285564	WHY2	D0 binding protein isoform 1 [Zea mays]	37.1353	49.9425	44.151	2.57013	2.48996	2.67797	134.265	155.682	148.396	10.0092	11.7255	6.11913	23.5055	35.8622	23.3796	39.3521	52.6585	72.7579	9.16195	12.8105	6.32696	0.0955896	3.69027	0.319549	-5.53311	-1.02038	4.021	-2.55402
yEpi65-1/yEpi66-1	Zm00001d053857	4	242293376	242298403	CCT7	T-complex protein 1 subunit eta [Zea mays]	146.527	84.5504	103.27	33.2659	50.206	38.3682	246.599	228.641	235.379	231.462	284.677	214.436	129.983	157.23	133.574	145.551	166.789	186.53	39.81	40.8507	30.3888	-0.395919	-0.397604	-0.249524	-1.63991	-0.736408	2.85914	-19.1051
yEpi65-1/yEpi66-1	Zm00001d053858	4	242390665	242395306	EHD1	EH-domain-containing protein 1 [Zea mays]	7.58515	11.2628	8.55223	1.29842	1.59376	1.74365	58.792	60.7293	60.375	6.09309	8.85171	3.45174	0	0.337207	0	3.99449	7.97651	14.4114	0.72357	1.10763	0.679686	-0.474076	2.01498	0.634256	-2.91498	-1	4.23195	-1.22853
yEpi65-1/yEpi66-1	Zm00001d053859	4	242396086	242396676	ERF4	ethylene-responsive transcription factor 3 [Zea mays]	4.14608	23.0521	14.6763	9.20203	14.9872	10.7296	4.72454	9.30465	7.78395	7.23265	7.77663	5.33959	6.46209	9.41209	6.91573	22.2618	20.8261	20.737	15.5643	29.019	14.5631	0.113953	-0.471913	0.335953	-7.96008	-0.692448	-1.12406	-1.14882
yEpi65-1/yEpi66-1	Zm00001d053861	4	242512382	242522531	Os02g0157700	PREDICTED: translation factor GUF1 homolog, chloroplastic [Zea mays]	11.5179	24.2298	19.7129	5.09089	11.4827	7.2256	9.37208	10.343	8.42927	10.2415	18.2352	11.7788	11.0963	13.5402	11.8227	10.1338	11.3323	9.71686	20.7063	17.5755	20.4683	0.289339	-0.332048	-2.94202	-0.615381	-0.40556	-1.69567	0.847941
yEpi65-1/yEpi66-1	Zm00001d053862	4	242512732	242523643	STR18	uncharacterized LOC100502537 [Zea mays]	400.457	198.589	287.131	100.336	56.8415	113.034	461.091	423.114	458.633	403.186	419.599	310.929	261.421	197.753	270.755	339.946	244.513	374.28	77.1467	124.494	62.514	-0.122776	1.58393	0.870547	-12.242	1.29319	1.71953	-1.6181
yEpi65-1/yEpi66-1	Zm00001d053863	4	242524003	242526153	Os01g0679700	60S ribosomal protein L37a isoform 2 [Zea mays]	0	0	0	0	0	0	0	0	0	0	0	0	0	0	0	0	0	0	0	0	0	NA	NA	NA	NA	NA	NA	NA
yEpi65-1/yEpi66-1	Zm00001d053864	4	242557991	242560362	RPL19B	60S ribosomal protein L19-2 [Zea mays]	125.756	114.662	130.169	24.4803	22.886	24.3094	127.671	163.289	138.842	136.746	145.587	112.401	76.4386	89.256	80.12	97.6918	112.288	125.72	55.699	57.8691	35.409	1.79557	0.785706	-0.37271	-6.50775	-0.425567	2.84055	-19.6992
yEpi65-1/yEpi66-1	Zm00001d053865	4	242558466	242564564	RPL19B	60S ribosomal protein L19-3 [Zea mays]	0	0	0	0	0	0	0	0	0	0	0	0	0	0	0	0	0	0	0	0	0	NA	NA	NA	NA	NA	NA	NA
yEpi65-2	Zm00001d013093	5	4608646	4623764	EGY1	PREDICTED: probable zinc metalloprotease EGY1, chloroplastic [Oryza sativa Japonica Group]	18.8758	22.7868	20.6834	4.34312	7.40399	6.30689	11.6349	12.8988	10.972	13.1469	19.4811	14.4679	21.3841	18.9494	13.729	16.1423	16.1116	12.511	17.9529	14.9212	14.8926	-0.0756451	0.283149	-2.04895	-0.582892	-5.28831	-236.054	-1.01883
yEpi65-2	Zm00001d013094	5	4676467	4680108	BPM4	speckle-type POZ protein [Zea mays]	32.4921	23.1243	28.7439	13.2848	17.7856	16.2133	67.747	58.7679	62.5971	43.1262	49.5283	43.3564	25.9252	30.3204	32.4186	40.558	43.7851	52.4757	31.048	27.6024	23.8137	0.199773	0.301336	-0.147085	-0.928077	1.95478	6.38593	-3.19925
yEpi65-2	Zm00001d013095	5	4680234	4684555	RFC5	PREDICTED: replication factor C subunit 5 [Zea mays]	21.7922	12.0669	16.2686	2.6037	1.2943	2.11404	55.4262	34.1409	46.3829	7.56827	8.24531	6.41426	10.0891	11.7394	9.08964	14.0186	15.938	21.8756	7.1265	7.06036	5.04898	-0.135929	0.252088	0.150276	-4.40899	-2.21118	7.187	-61.8203
yEpi65-2	Zm00001d013098	5	4694181	4700885	AO2	aldehyde oxidase2 [Zea mays]	6.68794	15.74	12.9478	0.45579	1.51057	0.538096	1.75775	12.7742	7.15527	0.687136	4.33173	2.096	13.2883	23.3122	14.952	2.61709	12.5235	5.81083	1.03326	6.30866	1.90907	0.383093	-0.843936	-0.0201017	-0.226875	-0.668052	-0.355217	-0.667963
yEpi65-2	Zm00001d013099	5	4703800	4704819	CXE15	PREDICTED: probable carboxylesterase 15 [Setaria italica]	1.27463	2.1823	1.40241	0.034267	0	0	0.206954	0.551711	0.320813	0.0515897	0.130449	0.0319977	1.97187	4.10915	2.96254	1.184	2.4218	1.34413	1.21042	1.54821	1.22881	-0.718449	-1	-0.33948	-1.49688	-0.0729645	-0.741279	-0.891117
yEpi65-2	Zm00001d013100	5	4705906	4709535	MYOB7	Myosin-binding protein 7 [Zea mays]	3.79814	4.96101	5.15285	0.499582	1.10831	0.870761	11.2189	12.9143	11.9983	1.69861	5.18268	2.20802	33.0717	25.7045	31.9028	21.5155	23.2335	20.4245	7.36467	8.5324	6.87478	1.32994	0.219514	-0.0806321	-0.707576	0.682683	-2.27019	-1.83904
yEpi65-2	Zm00001d013107	5	4767916	4771878	RHF2A	PREDICTED: uncharacterized LOC100280311 isoform X2 [Zea mays]	12.5655	7.86658	8.08496	14.3665	17.3962	19.7584	25.5333	26.6005	23.8105	14.3146	26.9706	24.5435	13.8129	13.5687	10.8366	33.5468	29.9606	28.3894	90.8953	90.3045	219.635	-0.907048	2.55941	-4.22894	0.616452	-23.38	-1.87621	436.772
yEpi65-2	Zm00001d013108	5	4776323	4780168	FLA17	fasciclin domain [Zea mays]	29.9051	67.7535	46.5652	54.6879	75.1503	59.521	17.7728	23.9205	23.7006	107.182	136.333	70.3815	54.2684	64.4429	101.575	100.322	125.932	56.0416	31.5104	37.254	35.4658	-0.119641	-0.52761	0.928482	-3.52485	8.29904	-4.45797	0.377296
yEpi65-2	Zm00001d013109	5	4781512	4784720	CPK20	calcium-dependent protein ki0se 10 [Zea mays]	3.93528	2.33204	2.80065	1.53348	1.30615	1.3281	5.71313	3.37543	6.60562	9.38093	13.3809	7.00883	1.19258	0.61458	1.96989	16.4792	17.6519	18.1132	13.3256	8.8354	19.5386	-0.415422	-0.806862	1.76356	-2.18606	3.68963	1.78689	3.76734
yEpi65-2	Zm00001d013111	5	4796152	4799203	D0J1	D0J protein [Zea mays]	0.505783	135.86	28.5753	0	27.689	6.24398	0.276321	52.0305	33.4249	0	61.8711	8.98636	0.102519	54.1917	28.0379	0.0369717	54.1776	34.8068	0.702037	38.0459	27.2428	-0.585245	-0.548991	0.281001	-0.709513	0.0329391	0.284426	0.421426
yEpi65-2	Zm00001d013112	5	4870603	4876521	IQD1	IQ-domain 5 [Zea mays]	11.8121	12.336	13.7294	8.22628	11.9677	8.81695	48.9378	59.7989	58.5221	22.1678	29.1601	24.2334	2.63842	10.5373	4.76555	21.5417	40.6783	46.1368	9.04266	10.7344	5.20949	6.31936	-0.684255	0.764885	-0.409203	-0.461412	1.57048	-5.53166
yEpi65-2	Zm00001d013113	5	4876757	4878827	-	expp1 protein precursor [Zea mays]	1.49262	5.31075	3.19372	0.275235	0.287089	0.182696	1.85318	3.28467	2.18837	0.57473	1.4083	0	28.3287	32.9949	40.7532	2.78705	3.36527	5.45514	11.7128	36.83	14.661	-0.108937	-16.6136	-0.53169	-2.37896	4.32533	8.22862	-0.765245
yEpi65-2	Zm00001d013116	5	4888300	4898094	CUL4	Cullin-4 [Zea mays]	30.0969	23.3086	26.4127	8.32881	15.1246	12.9274	53.258	45.8841	51.3423	39.8853	55.2093	35.0916	27.7655	34.6912	32.7404	31.7194	37.2186	38.3983	16.8953	14.1692	14.0883	-0.0854626	0.353372	0.480424	-1.62565	0.43667	1.42907	-1.05936
yEpi66-2	Zm00001d036593	6	93920665	93928357	ARF17	Auxin response factor 6 [Zea mays]	14.7521	25.6169	26.8525	0.38021	0.53368	0.482081	54.5096	64.0573	56.0645	0.537258	0.248097	0.901819	25.7153	34.1495	22.3958	47.8624	60.0106	39.7395	8.15298	10.3217	7.84723	1.22745	0.327573	-0.674281	3.5215	-1.78713	-2.3373	-1.28197
yEpi67-1	Zm00001d012170	8	169429054	169433174	CRT3	Calreticulin-3 [Zea mays]	33.4839	31.527	31.2353	4.84738	3.47623	5.07303	69.2342	59.7995	63.2776	3.74095	5.31487	3.50153	41.7802	48.8596	44.6597	50.1159	66.3313	51.1005	53.2284	40.9655	39.321	-1.29808	1.32915	-0.262689	-1.30423	-0.186507	-0.878564	-1.2682
yEpi67-1	Zm00001d012173	8	169516096	169525048	FRK1	fructoki0se-1 [Zea mays]	8.85725	8.58546	8.62623	7.19205	6.05681	15.3649	21.453	27.3436	23.0534	5.16769	4.68083	3.78276	18.1003	27.5453	30.1463	23.6054	29.1235	33.5505	4.12485	6.93349	4.10159	-0.700003	15.3986	-0.456601	-4.68918	1.55078	2.60449	-1.01657
yEpi67-1	Zm00001d012178	8	169610519	169612653	STR4A	Rhodanese-like domain-containing protein 4A chloroplastic [Zea mays]	16.9644	14.4647	18.7828	7.41856	9.90483	8.69885	25.29	17.594	22.4255	13.063	20.1823	11.5787	12.6926	11.7514	13.3454	18.2518	14.6776	21.0842	20.238	19.0028	14.905	2.45492	0.0298869	0.255581	-1.41699	2.38699	2.58492	-7.63535
yEpi67-1	Zm00001d012194	8	169912082	169912459	-	PREDICTED: protein AUXIN-REGULATED GENE INVOLVED IN ORGAN SIZE-like [Zea mays]	48.6802	32.0714	38.4915	6.60068	4.42027	7.73323	59.0521	59.0475	54.1501	24.1421	19.239	18.3565	30.8227	35.0132	33.2748	39.9045	42.1399	42.3042	22.6037	12.6496	15.1059	-0.226904	2.03884	-2145.21	-1.35997	0.170319	1.14699	-0.506477
yEpi67-1	Zm00001d012195	8	169913488	169917951	rio2	serine/threonine ki0se [Zea mays]	0.140141	0	0	0.410232	0	0.348335	0	0	0.10228	0.989224	0.285822	0.689978	0.193583	0	0.475654	0.0670167	0	0	0.0304197	0.345808	0.514973	-1	0.698231	NA	0.149147	3.91421	-1	2.07274
yEpi67-1	Zm00001d012196	8	169919970	169924165	Os01g0887700	PREDICTED: PHD finger protein isoform X3 [Zea mays]	39.9654	20.2744	28.7256	11.4085	5.08746	10.0268	87.1627	80.1068	80.6011	43.6939	23.7013	30.1401	68.8978	58.171	78.0222	54.2862	36.4875	60.6703	19.0054	12.4869	9.85963	-0.141621	0.562814	-0.859885	-0.355882	2.70125	1.71737	-1.80611
yEpi67-2	Zm00001d012131	8	168615878	168618956	CPN10	hypothetical protein ZEAMMB73_Zm00001d012131, partial [Zea mays]	24.3467	32.069	27.5064	3.32677	3.63359	3.2571	31.0014	29.1546	26.6339	6.74614	4.26554	4.38424	11.7808	9.66289	11.6395	15.1567	13.9221	17.4986	2.88167	4.24234	4.12762	-0.181669	-1.4541	-3.72989	-0.904291	0.866503	4.79373	0.831382
yEpi67-2	Zm00001d012137	8	168709170	168716793	At5g05200	Protein ki0se [Zea mays]	13.065	11.533	13.0212	1.70761	2.76264	3.134	20.3001	22.052	18.4955	16.8747	21.8506	14.2954	26.4247	38.6649	26.5505	20.6575	22.9905	21.527	20.2644	17.4054	16.8859	0.942861	1.70397	-3.06017	-2.03669	-0.979443	-0.254637	-1.3634
yEpi67-2	Zm00001d012140	8	168727319	168730510	CXE16	PREDICTED: probable carboxylesterase 16 [Zea mays]	6.45956	11.0238	9.69629	4.28473	5.94477	3.77221	9.03805	10.8829	9.20712	8.6026	9.96992	6.34035	8.49331	9.15049	8.45838	11.2333	12.4407	10.6292	5.39526	7.40442	4.95002	0.418298	-1.61748	-0.816708	-4.30904	-1.10629	-2.00056	-1.44321
yEpi67-2	Zm00001d012141	8	168732016	168736038	PTAC10	PREDICTED: protein PLASTID TRANSCRIPTIO0LLY ACTIVE 10 [Setaria italica]	8.94983	10.4786	11.6993	1.31323	1.63322	2.20944	21.6638	25.5861	22.1648	4.80676	5.04962	3.32688	26.7379	23.6564	24.6343	24.1136	25.2535	26.295	26.1579	17.2613	14.8057	2.59703	4.60145	-0.74453	-13.187	-0.36531	2.82745	-1.55202
yEpi67-2	Zm00001d012142	8	168736577	168739121	yuiD	acid phosphatase/va0dium-dependent haloperoxidase protein [Zea mays]	3.40103	6.31321	3.31051	6.12219	15.2312	11.1994	11.8801	12.376	16.8795	20.0032	25.6547	18.315	17.7586	23.2253	20.8896	16.716	20.9475	21.0699	120.488	89.3497	185.773	-1.06217	0.114782	19.1622	-1.59746	0.145459	1.05786	5.1932
yEpi67-2	Zm00001d012144	8	168855687	168867132	4CLL5	4-coumarate--CoA ligase-like 9 [Zea mays]	3.41862	8.86946	6.2318	0.204961	2.71817	1.37122	30.5637	43.1344	35.6242	3.87501	13.7489	5.78447	6.5943	26.0928	15.4644	14.1481	24.8677	23.7295	97.1352	88.3083	79.5379	0.0322003	-0.0718959	-0.194875	-0.613231	-0.0901733	0.787639	-2.98723
yEpi68-1	Zm00001d046555	9	95832622	95834867	RPL35	prpl35-1 protein [Zea mays]	0	0	0	0	0	0	0	0.0977807	0	0	0	0	0	0.0781453	0.0753477	0	0	0	0.122893	0.0889413	0.4238	NA	NA	-1	NA	0.928398	NA	18.7258
yEpi68-1	Zm00001d046558	9	95895575	95899022	HGGT	homogentisate geranylgeranyl transferase1 [Zea mays]	4.20356	0	0.876072	15.4205	7.31165	16.1636	0	0	0	56.5212	40.2257	44.0376	0	0	0	0	0	0	7.51897	17.9402	4.13523	-0.583176	1.18326	NA	-0.532152	NA	NA	-1.6494
yEpi68-1	Zm00001d046561	9	95968172	95971622	At1g80640	Protein ki0se superfamily protein [Zea mays]	6.62729	2.14006	3.77453	0.032137	0	0	58.588	40.2568	49.7004	1.46994	0.962128	0.552374	178.704	75.0966	125.107	70.0581	47.7447	49.2056	2.2022	1.12454	1.19353	-0.2715	-1	0.0303293	-2.61382	-0.0346076	-0.869063	-0.87197
yEpi68-1	Zm00001d046564	9	96085990	96091648	-	bZIP transcription factor, partial [Zea mays]	1.42303	0.487371	1.36262	0.639434	0.577705	1.06903	2.82065	2.18256	2.90428	0.943853	0	0.700155	0.473269	0.470028	0.730931	3.36101	1.75004	2.33339	1.99349	2.16632	1.29769	0.870879	14.9188	1.26211	0.48361	160.034	-0.275775	-9.05179
yEpi68-2	Zm00001d048574	9	159326202	159349212	0GS1	PREDICTED: probable amino-acid acetyltransferase 0GS1, chloroplastic [Setaria italica]	20.9965	14.6704	16.3971	4.64407	5.54168	6.3703	43.5295	44.8672	47.5828	20.5635	20.0057	19.1478	44.8868	55.8484	49.5356	54.5629	61.0597	50.0842	23.8432	23.9031	21.1726	-0.454113	2.84626	5.0598	-4.07599	-0.1518	-2.37876	-90.0621
yEpi68-2	Zm00001d048575	9	159481003	159515310	-	myosin heavy chain-related [Zea mays]	48.9169	53.5026	51.1895	3.55372	4.58277	4.53285	76.8283	75.4416	68.1166	14.758	13.8351	12.3524	46.4231	56.8025	41.6533	57.9741	68.2912	52.4604	16.8115	19.5568	16.7827	-0.00882099	0.902966	-11.565	-4.21303	-1.91909	-2.06885	-1.02098
